# Supplementary material for: Minigene-based characterization and classification of splice-associated variants in succinate dehydrogenase B
Source: Research Square preprint supplement (doi:10.21203/rs.3.rs-8661010/v1), 2026-02-24
Supplement: Supplementary file 1 [file 5f3a0b9bff38f0d1ff30469e.xlsx]

## Sheet: Splice variants
Selected for SDHB MG	#CHROM	POS (Hg 19)	POS (Hg 38)	REF	ALT	DS_AG	DS_AL	DS_DG	DS_DL	DS_MAX	DP_AG	DP_AL	DP_DG	DP_DL	DS_AG_REF	DS_AG_ALT	DS_AL_REF	DS_AL_ALT	DS_DG_REF	DS_DG_ALT	DS_DL_REF	DS_DL_ALT	Consequence_x	feature	intr_ex	acc_don	dist_exin	MaxEntScan_alt	MaxEntScan_diff	MaxEntScan_ref	ada_score	rf_score	CADD_PHRED	CADD_RAW	Consequence_y	IMPACT	SYMBOL	Feature2	BIOTYPE	HGVSc	HGVSp	cDNA_position	CDS_position	Protein_position	Amino_acids	Codons	Existing_variation	STRAND	SIFT
	1	17371405	17044910	A	T	0.98	0.67	0	0		-2	-22	1259	231	0	0.98	0.99	0.33	0.05	0.05	0.03	0.03	intron_variant	intron	1	acceptor	22	-	-	-	-	-	22.3	2.36529	intron_variant	MODIFIER	SDHB	NM_003000.3	protein_coding	NM_003000.3:c.73-22T>A								-1
	1	17371403	17044908	A	T	0.82	0.08	0	0		-2	-20	-809	233	0	0.82	0.99	0.91	0	0.01	0.03	0.03	intron_variant	intron	1	acceptor	20	3.586	1.725	5.311	-	-	16.23	1.49411	intron_variant	MODIFIER	SDHB	NM_003000.3	protein_coding	NM_003000.3:c.73-20T>A								-1
	1	17371400	17044905	T	C	0.79	0.24	0	0		-1	-17	-806	236	0	0.79	0.99	0.75	0	0	0.03	0.03	splice_polypyrimidine_tract_variant,intron_variant	intron	1	acceptor	17	4.705	0.606	5.311	-	-	16.86	1.60216	splice_polypyrimidine_tract_variant,intron_variant	LOW	SDHB	NM_003000.3	protein_coding	NM_003000.3:c.73-17A>G								-1
	1	17371399	17044904	G	C	1	0.73	0	0		-1	-16	-805	237	0	1	0.99	0.27	0	0.01	0.03	0.03	splice_polypyrimidine_tract_variant,intron_variant	intron	1	acceptor	16	3.442	1.869	5.311	-	-	20.7	2.10574	splice_polypyrimidine_tract_variant,intron_variant	LOW	SDHB	NM_003000.3	protein_coding	NM_003000.3:c.73-16C>G								-1
	1	17371394	17044899	T	C	1	0.94	0	0		-1	-11	242	1270	0	1	0.99	0.06	0.03	0.03	0.05	0.05	splice_polypyrimidine_tract_variant,intron_variant	intron	1	acceptor	11	-0.382	5.694	5.311	0.993002211060919	0.862	23.7	3.07021	splice_polypyrimidine_tract_variant,intron_variant	LOW	SDHB	NM_003000.3	protein_coding	NM_003000.3:c.73-11A>G								-1
	1	17371393	17044898	T	C	1	0.64	0	0		-1	-10	-799	91	0	1	0.99	0.35	0	0	0.01	0	splice_polypyrimidine_tract_variant,intron_variant	intron	1	acceptor	10	-1.752	7.063	5.311	0.998931393568975	0.992	22.9	2.6772	splice_polypyrimidine_tract_variant,intron_variant	LOW	SDHB	NM_003000.3	protein_coding	NM_003000.3:c.73-10A>G								-1
	1	17371392	17044897	T	C	1	0.9	0	0		-1	-9	244	1272	0	1	0.99	0.1	0.03	0.03	0.05	0.05	splice_polypyrimidine_tract_variant,intron_variant	intron	1	acceptor	9	-0.734	6.045	5.311	0.999741258477557	0.956	24	3.18277	splice_polypyrimidine_tract_variant,intron_variant	LOW	SDHB	NM_003000.3	protein_coding	NM_003000.3:c.73-9A>G							rs1553178757,CS065615	-1
	1	17371391	17044896	T	C	1	0.88	0	0		-1	-8	-797	1273	0	1	0.99	0.12	0	0	0.05	0.05	splice_region_variant,splice_polypyrimidine_tract_variant,intron_variant	intron	1	acceptor	8	-1.454	6.765	5.311	0.999439585537958	0.946	23.6	2.99937	splice_polypyrimidine_tract_variant,splice_region_variant,intron_variant	LOW	SDHB	NM_003000.3	protein_coding	NM_003000.3:c.73-8A>G								-1
	1	17371390	17044895	T	C	1	0.67	0	0		-1	-7	1274	-134	0	1	0.99	0.32	0.05	0.05	1	1	splice_region_variant,splice_polypyrimidine_tract_variant,intron_variant	intron	1	acceptor	7	-0.988	6.299	5.311	0.999698406923899	0.988	23.3	2.88232	splice_polypyrimidine_tract_variant,splice_region_variant,intron_variant	LOW	SDHB	NM_003000.3	protein_coding	NM_003000.3:c.73-7A>G								-1
	1	17371389	17044894	A	C	0.99	0.24	0	0		-1	-6	-795	247	0	0.99	0.99	0.75	0	0.01	0.03	0.03	splice_region_variant,splice_polypyrimidine_tract_variant,intron_variant	intron	1	acceptor	6	-1.315	6.626	5.311	0.999909383462851	0.956	23.8	3.10821	splice_polypyrimidine_tract_variant,splice_region_variant,intron_variant	LOW	SDHB	NM_003000.3	protein_coding	NM_003000.3:c.73-6T>G								-1
	1	17371385	17044890	T	G	0.66	0.99	0	0.01		-12	-2	-791	-129	0	0.66	0.99	0	0	0.01	1	0.99	splice_acceptor_variant	intron	1	acceptor	2	-2.731	8.042	5.311	0.999959626360342	0.902	34	5.79933	splice_acceptor_variant	HIGH	SDHB	NM_003000.3	protein_coding	NM_003000.3:c.73-2A>C								-1
	1	17371385	17044890	T	C	0.5	0.99	0	0.01		-12	-2	-791	-129	0	0.5	0.99	0	0	0.01	1	0.99	splice_acceptor_variant	intron	1	acceptor	2	-2.644	7.955	5.311	0.999959626360342	0.902	34	5.75554	splice_acceptor_variant	HIGH	SDHB	NM_003000.3	protein_coding	NM_003000.3:c.73-2A>G								-1
	1	17371385	17044890	T	A	0.66	0.99	0	0.01		-12	-2	-791	-129	0	0.66	0.99	0	0	0.01	1	0.99	splice_acceptor_variant	intron	1	acceptor	2	-3.056	8.367	5.311	0.999979394981131	0.908	34	5.74154	splice_acceptor_variant	HIGH	SDHB	NM_003000.3	protein_coding	NM_003000.3:c.73-2A>T							rs1474282888	-1
	1	17371384	17044889	C	A	0.71	0.99	0	0.01		-11	-1	-790	-128	0	0.71	0.99	0	0	0.01	1	0.99	splice_acceptor_variant	intron	1	acceptor	1	-3.287	8.598	5.311	0.999982627682474	0.902	34	5.87559	splice_acceptor_variant	HIGH	SDHB	NM_003000.3	protein_coding	NM_003000.3:c.73-1G>T							rs1131691055	-1
	1	17371384	17044889	C	G	0.66	0.97	0	0.01		-11	-1	-790	-128	0	0.66	0.99	0.02	0	0.01	1	0.99	splice_acceptor_variant	intron	1	acceptor	1	-2.753	8.064	5.311	0.999965960435774	0.896	34	5.75785	splice_acceptor_variant	HIGH	SDHB	NM_003000.3	protein_coding	NM_003000.3:c.73-1G>C								-1
	1	17371384	17044889	C	T	0.98	0.99	0	0		-2	-1	-790	-128	0	0.98	0.99	0	0	0.01	1	0.99	splice_acceptor_variant	intron	1	acceptor	1	-3.439	8.750	5.311	0.999982627682474	0.902	35	6.12633	splice_acceptor_variant	HIGH	SDHB	NM_003000.3	protein_coding	NM_003000.3:c.73-1G>A							rs1131691055	-1
	1	17371259	17044764	T	C	0	0	0.91	0.01		-635	124	1	-3	0.03	0.03	0.99	0.99	0	0.91	1	0.98	missense_variant	exon	2	donor	3	-	-	-	-	-	23.3	2.89819	missense_variant	MODERATE	SDHB	NM_003000.3	protein_coding	NM_003000.3:c.197A>G	NP_002991.2:p.Asn66Ser	210	197	66	N/S	aAt/aGt		-1	tolerated(0.11)
	1	17371255	17044760	C	T	0.01	0.19	0.05	0.95		1325	128	-3	1	0.01	0.02	0.99	0.8	0	0.05	1	0.05	splice_donor_variant	intron	2	donor	1	-1.748	8.182	6.434	0.999962297682439	0.962	33	5.11169	splice_donor_variant	HIGH	SDHB	NM_003000.3	protein_coding	NM_003000.3:c.200+1G>A							CS094758	-1
	1	17371255	17044760	C	A	0.01	0.18	0.05	0.99		1325	128	2	1	0.01	0.02	0.99	0.81	0	0.05	1	0	splice_donor_variant	intron	2	donor	1	-2.070	8.504	6.434	0.999962297682439	0.966	33	5.18625	splice_donor_variant	HIGH	SDHB	NM_003000.3	protein_coding	NM_003000.3:c.200+1G>T							CS094758	-1
	1	17371255	17044760	C	G	0.01	0.24	0.1	0.99		1325	128	-3	1	0.01	0.02	0.99	0.75	0	0.1	1	0	splice_donor_variant	intron	2	donor	1	-1.839	8.273	6.434	0.999962297682439	0.966	33	5.15606	splice_donor_variant	HIGH	SDHB	NM_003000.3	protein_coding	NM_003000.3:c.200+1G>C							CS094758	-1
	1	17371254	17044759	A	C	0.01	0.24	0.02	0.98		1326	129	-660	2	0.01	0.02	0.99	0.75	0	0.02	1	0.02	splice_donor_variant	intron	2	donor	2	-1.213	7.647	6.434	0.99994568797423	0.948	33	5.38449	splice_donor_variant	HIGH	SDHB	NM_003000.3	protein_coding	NM_003000.3:c.200+2T>G								-1
	1	17371254	17044759	A	G	0.01	0.1	0.05	0.31		1615	129	-2	2	0.02	0.03	0.99	0.9	0	0.05	1	0.69	splice_donor_variant	intron	2	donor	2	-1.320	7.754	6.434	0.999686616955574	0.878	32	4.49662	splice_donor_variant	HIGH	SDHB	NM_003000.3	protein_coding	NM_003000.3:c.200+2T>C								-1
	1	17371254	17044759	A	T	0.01	0.23	0.02	0.96		1326	129	-660	2	0.01	0.02	0.99	0.77	0	0.02	1	0.03	splice_donor_variant	intron	2	donor	2	-1.750	8.183	6.434	0.999978952611685	0.95	33	5.32033	splice_donor_variant	HIGH	SDHB	NM_003000.3	protein_coding	NM_003000.3:c.200+2T>A								-1
	1	17371251	17044756	C	G	0.01	0.25	0.02	0.73		1329	132	-657	5	0.01	0.02	0.99	0.74	0	0.02	1	0.27	splice_donor_5th_base_variant,intron_variant	intron	2	donor	5	-2.046	8.480	6.434	0.999987330007069	0.998	24.8	3.43661	splice_donor_5th_base_variant,intron_variant	LOW	SDHB	NM_003000.3	protein_coding	NM_003000.3:c.200+5G>C							rs1553178726	-1
	1	17371251	17044756	C	T	0.01	0.23	0.02	0.48		1329	132	-657	5	0.01	0.02	0.99	0.76	0	0.02	1	0.52	splice_donor_5th_base_variant,intron_variant	intron	2	donor	5	-2.135	8.569	6.434	0.999983952707761	1.0	23.9	3.13936	splice_donor_5th_base_variant,intron_variant	LOW	SDHB	NM_003000.3	protein_coding	NM_003000.3:c.200+5G>A								-1
	1	17371251	17044756	C	A	0.01	0.27	0.02	0.64		1329	132	-657	5	0.01	0.02	0.99	0.72	0	0.02	1	0.36	splice_donor_5th_base_variant,intron_variant	intron	2	donor	5	-2.294	8.728	6.434	0.999978777684288	0.98	24.4	3.31284	splice_donor_5th_base_variant,intron_variant	LOW	SDHB	NM_003000.3	protein_coding	NM_003000.3:c.200+5G>T								-1
	1	17371222	17044727	T	A	0	0	0.54	0.01		-598	1358	2	34	0.03	0.03	0.01	0.01	0	0.54	1	0.98	intron_variant	intron	2	donor	34	-	-	-	-	-	11.66	0.7635	intron_variant	MODIFIER	SDHB	NM_003000.3	protein_coding	NM_003000.3:c.200+34A>T								-1
yes	1	17359736	17033241	T	C	0.25	0.01	0.57	0.05	0.57	115	-96	1	-17	0	0.25	0.97	0.96	0	0.57	0.05	0	intron_variant	intron	2	acceptor	96	-	-	-	-	-	8.693	0.427906	intron_variant	MODIFIER	SDHB	NM_003000.3	protein_coding	NM_003000.3:c.201-96A>G								-1
yes	1	17359731	17033236	G	C	0.31	0.01	0.81	0.05	0.81	120	-91	1	-12	0	0.31	0.97	0.95	0	0.81	0.05	0	intron_variant	intron	2	acceptor	91	-	-	-	-	-	11.01	0.68303	intron_variant	MODIFIER	SDHB	NM_003000.3	protein_coding	NM_003000.3:c.201-91C>G							rs1411857144	-1
	1	17359716	17033221	C	T	0.08	0.01	0.28	0.03		135	633	3	-161	0	0.08	0.07	0.06	0.05	0.33	0.94	0.91	intron_variant	intron	2	acceptor	76	-	-	-	-	-	9.187	0.477341	intron_variant	MODIFIER	SDHB	NM_003000.3	protein_coding	NM_003000.3:c.201-76G>A								-1
	1	17359714	17033219	G	C	0.06	0.01	0.29	0.03		137	635	5	-159	0	0.06	0.07	0.06	0.05	0.34	0.94	0.92	intron_variant	intron	2	acceptor	74	-	-	-	-	-	8.122	0.37495	intron_variant	MODIFIER	SDHB	NM_003000.3	protein_coding	NM_003000.3:c.201-74C>G								-1
	1	17359656	17033161	A	C	0.01	0.29	0	0.43		-1	-16	-16	-101	0	0.01	0.97	0.67	0	0	0.94	0.51	splice_polypyrimidine_tract_variant,intron_variant	intron	2	acceptor	16	4.628	2.083	6.712	-	-	9.301	0.489185	splice_polypyrimidine_tract_variant,intron_variant	LOW	SDHB	NM_003000.3	protein_coding	NM_003000.3:c.201-16T>G								-1
yes	1	17359654	17033159	A	C	0.02	0.76	0	0.82	0.82	-1	-14	-1	-99	0	0.02	0.97	0.21	0	0	0.94	0.12	splice_polypyrimidine_tract_variant,intron_variant	intron	2	acceptor	14	4.114	2.598	6.712	-	-	17.18	1.65385	splice_polypyrimidine_tract_variant,intron_variant	LOW	SDHB	NM_003000.3	protein_coding	NM_003000.3:c.201-14T>G								-1
	1	17359653	17033158	A	T	0	0.13	0	0.3		-85	-13	-13	-98	0	0	0.97	0.84	0	0	0.94	0.64	splice_polypyrimidine_tract_variant,intron_variant	intron	2	acceptor	13	5.266	1.446	6.712	-	-	9.888	0.552977	splice_polypyrimidine_tract_variant,intron_variant	LOW	SDHB	NM_003000.3	protein_coding	NM_003000.3:c.201-13T>A								-1
	1	17359652	17033157	A	C	0	0.17	0	0.34		-84	-12	-12	-97	0	0	0.97	0.8	0	0	0.94	0.6	splice_polypyrimidine_tract_variant,intron_variant	intron	2	acceptor	12	5.899	0.813	6.712	8.46049572332547E-5	0.044	10.35	0.60425	splice_polypyrimidine_tract_variant,intron_variant	LOW	SDHB	NM_003000.3	protein_coding	NM_003000.3:c.201-12T>G								-1
	1	17359652	17033157	A	T	0	0.27	0	0.45		-84	-12	-12	-97	0	0	0.97	0.7	0	0	0.94	0.49	splice_polypyrimidine_tract_variant,intron_variant	intron	2	acceptor	12	5.229	1.482	6.712	5.62872133997618E-4	0.102	12.09	0.817057	splice_polypyrimidine_tract_variant,intron_variant	LOW	SDHB	NM_003000.3	protein_coding	NM_003000.3:c.201-12T>A								-1
	1	17359651	17033156	A	T	0	0.21	0	0.4		-83	-11	-11	-96	0	0	0.97	0.76	0	0	0.94	0.55	splice_polypyrimidine_tract_variant,intron_variant	intron	2	acceptor	11	5.108	1.604	6.712	0.00239811480774848	0.172	11.93	0.797471	splice_polypyrimidine_tract_variant,intron_variant	LOW	SDHB	NM_003000.3	protein_coding	NM_003000.3:c.201-11T>A								-1
	1	17359650	17033155	A	C	0	0.29	0	0.46		-82	-10	-10	-95	0	0	0.97	0.68	0	0	0.94	0.49	splice_polypyrimidine_tract_variant,intron_variant	intron	2	acceptor	10	5.285	1.426	6.712	0.00216982454415582	0.106	13.02	0.941928	splice_polypyrimidine_tract_variant,intron_variant	LOW	SDHB	NM_003000.3	protein_coding	NM_003000.3:c.201-10T>G								-1
	1	17359650	17033155	A	T	0	0.39	0	0.56		-82	-10	-10	-95	0	0	0.97	0.58	0	0	0.94	0.38	splice_polypyrimidine_tract_variant,intron_variant	intron	2	acceptor	10	4.989	1.722	6.712	0.00245110540100354	0.096	13.72	1.04348	splice_polypyrimidine_tract_variant,intron_variant	LOW	SDHB	NM_003000.3	protein_coding	NM_003000.3:c.201-10T>A							rs761461907	-1
	1	17359648	17033153	A	C	0	0.18	0	0.33		-80	-8	-8	-93	0	0	0.97	0.79	0	0	0.94	0.62	splice_region_variant,splice_polypyrimidine_tract_variant,intron_variant	intron	2	acceptor	8	6.235	0.476	6.712	5.18035431760296E-5	0.056	10.35	0.605217	splice_polypyrimidine_tract_variant,splice_region_variant,intron_variant	LOW	SDHB	NM_003000.3	protein_coding	NM_003000.3:c.201-8T>G								-1
	1	17359648	17033153	A	T	0	0.25	0	0.44		-80	-8	-8	-93	0	0	0.97	0.72	0	0	0.94	0.5	splice_region_variant,splice_polypyrimidine_tract_variant,intron_variant	intron	2	acceptor	8	6.012	0.699	6.712	1.17436906985843E-4	0.068	10.47	0.618482	splice_polypyrimidine_tract_variant,splice_region_variant,intron_variant	LOW	SDHB	NM_003000.3	protein_coding	NM_003000.3:c.201-8T>A								-1
	1	17359647	17033152	A	C	0	0.27	0	0.46		-79	-7	-7	-92	0	0	0.97	0.69	0	0	0.94	0.48	splice_region_variant,splice_polypyrimidine_tract_variant,intron_variant	intron	2	acceptor	7	7.131	-0.420	6.712	4.72021994921815E-4	0.058	10.9	0.669266	splice_polypyrimidine_tract_variant,splice_region_variant,intron_variant	LOW	SDHB	NM_003000.3	protein_coding	NM_003000.3:c.201-7T>G								-1
	1	17359647	17033152	A	T	0	0.38	0	0.59		-79	-7	-7	-92	0	0	0.97	0.59	0	0	0.94	0.35	splice_region_variant,splice_polypyrimidine_tract_variant,intron_variant	intron	2	acceptor	7	6.636	0.076	6.712	5.96602646502136E-4	0.034	12.82	0.914073	splice_polypyrimidine_tract_variant,splice_region_variant,intron_variant	LOW	SDHB	NM_003000.3	protein_coding	NM_003000.3:c.201-7T>A								-1
	1	17359646	17033151	A	T	0.08	0.83	0	0.8		-2	-6	-2	-91	0	0.08	0.97	0.14	0	0	0.94	0.14	splice_region_variant,splice_polypyrimidine_tract_variant,intron_variant	intron	2	acceptor	6	0.738	5.974	6.712	0.999901071283636	0.98	22.1	2.3114	splice_polypyrimidine_tract_variant,splice_region_variant,intron_variant	LOW	SDHB	NM_003000.3	protein_coding	NM_003000.3:c.201-6T>A								-1
	1	17359646	17033151	A	C	0	0.5	0	0.65		-78	-6	0	-91	0	0	0.97	0.47	0	0	0.94	0.29	splice_region_variant,splice_polypyrimidine_tract_variant,intron_variant	intron	2	acceptor	6	5.427	1.285	6.712	0.00791984408252561	0.15	13.72	1.04401	splice_polypyrimidine_tract_variant,splice_region_variant,intron_variant	LOW	SDHB	NM_003000.3	protein_coding	NM_003000.3:c.201-6T>G								-1
yes	1	17359643	17033148	A	T	0	0.64	0	0.8	0.8	-75	-3	3	-88	0	0.01	0.97	0.33	0	0	0.94	0.15	splice_region_variant,splice_polypyrimidine_tract_variant,intron_variant	intron	2	acceptor	3	4.158	2.554	6.712	0.0280700259970684	0.17	14.99	1.26311	splice_polypyrimidine_tract_variant,splice_region_variant,intron_variant	LOW	SDHB	NM_003000.3	protein_coding	NM_003000.3:c.201-3T>A								-1
	1	17359643	17033148	A	C	0	0.94	0	0.91		298	-3	49	-88	0	0.01	0.97	0.03	0	0	0.94	0.03	splice_region_variant,splice_polypyrimidine_tract_variant,intron_variant	intron	2	acceptor	3	0.472	6.240	6.712	0.918583822264991	0.676	21.8	2.26508	splice_polypyrimidine_tract_variant,splice_region_variant,intron_variant	LOW	SDHB	NM_003000.3	protein_coding	NM_003000.3:c.201-3T>G								-1
yes	1	17359642	17033147	T	A	0.01	0.97	0	0.91	0.97	-36	-2	50	-87	0	0.01	0.97	0	0	0	0.94	0.04	splice_acceptor_variant	intron	2	acceptor	2	-1.655	8.367	6.712	0.999988247793601	0.928	33	5.22847	splice_acceptor_variant	HIGH	SDHB	NM_003000.3	protein_coding	NM_003000.3:c.201-2A>T								-1
yes	1	17359642	17033147	T	G	0.01	0.97	0	0.9	0.97	-36	-2	50	-87	0	0.01	0.97	0	0	0	0.94	0.04	splice_acceptor_variant	intron	2	acceptor	2	-1.331	8.042	6.712	0.999988247793601	0.928	33	5.18234	splice_acceptor_variant	HIGH	SDHB	NM_003000.3	protein_coding	NM_003000.3:c.201-2A>C							rs878854574	-1
	1	17359642	17033147	T	C	0	0.97	0	0.91		299	-2	50	-87	0	0.01	0.97	0	0	0	0.94	0.03	splice_acceptor_variant	intron	2	acceptor	2	-1.243	7.955	6.712	0.999988247793601	0.928	33	5.17314	splice_acceptor_variant	HIGH	SDHB	NM_003000.3	protein_coding	NM_003000.3:c.201-2A>G								-1
yes	1	17359641	17033146	C	G	0.01	0.97	0	0.9	0.97	-73	-1	51	-86	0	0.01	0.97	0	0	0	0.94	0.04	splice_acceptor_variant	intron	2	acceptor	1	-1.353	8.064	6.712	0.999937375548084	0.902	27.8	4.0126	splice_acceptor_variant	HIGH	SDHB	NM_003000.3	protein_coding	NM_003000.3:c.201-1G>C							CS094759	-1
	1	17359641	17033146	C	A	0.01	0.97	0	0.91		-73	-1	51	-86	0	0.01	0.97	0	0	0	0.94	0.03	splice_acceptor_variant	intron	2	acceptor	1	-1.887	8.598	6.712	0.99993948630048	0.904	29.5	4.20124	splice_acceptor_variant	HIGH	SDHB	NM_003000.3	protein_coding	NM_003000.3:c.201-1G>T							CS094759	-1
	1	17359641	17033146	C	T	0	0.97	0	0.92		-73	-1	51	-86	0	0.01	0.97	0	0	0	0.94	0.03	splice_acceptor_variant	intron	2	acceptor	1	-2.039	8.750	6.712	0.99993948630048	0.906	29.5	4.20066	splice_acceptor_variant	HIGH	SDHB	NM_003000.3	protein_coding	NM_003000.3:c.201-1G>A							CS094759	-1
	1	17359640	17033145	T	A	0	0.3	0	0.41		-72	0	6	-85	0	0	0.97	0.66	0	0	0.94	0.53	missense_variant,splice_region_variant	exon	3	acceptor	0	5.688	1.024	6.712	6.19114053033319E-4	0.014	18.28	1.81054	missense_variant,splice_region_variant	MODERATE	SDHB	NM_003000.3	protein_coding	NM_003000.3:c.201A>T	NP_002991.2:p.Lys67Asn	214	201	67	K/N	aaA/aaT		-1	tolerated(0.28)
yes	1	17359639	17033144	A	T	0.18	0.34	0	0.5	0.5	-2	1	1	-84	0	0.18	0.97	0.63	0	0	0.94	0.45	missense_variant,splice_region_variant	exon	3	acceptor	1	4.290	2.422	6.712	0.418054268479844	0.578	32	4.71601	missense_variant,splice_region_variant	MODERATE	SDHB	NM_003000.3	protein_coding	NM_003000.3:c.202T>A	NP_002991.2:p.Cys68Ser	215	202	68	C/S	Tgt/Agt		-1	deleterious(0.01)
	1	17359639	17033144	A	C	0.33	0.09	0	0.18		-1	1	-522	-84	0	0.33	0.97	0.88	0	0	0.94	0.76	missense_variant,splice_region_variant	exon	3	acceptor	1	4.710	2.001	6.712	0.51650031560227	0.538	32	4.57632	missense_variant,splice_region_variant	MODERATE	SDHB	NM_003000.3	protein_coding	NM_003000.3:c.202T>G	NP_002991.2:p.Cys68Gly	215	202	68	C/G	Tgt/Ggt		-1	deleterious(0)
	1	17359623	17033128	A	T	0	0.38	0	0.54		-2	17	17	-68	0	0	0.97	0.59	0	0	0.94	0.4	stop_gained	exon	3	acceptor	17	-	-	-	-	-	40	7.97929	stop_gained	HIGH	SDHB	NM_003000.3	protein_coding	NM_003000.3:c.218T>A	NP_002991.2:p.Leu73Ter	231	218	73	L/*	tTg/tAg		-1
yes	1	17359622	17033127	C	T	0	0.27	0	0.48	0.48	-54	18	18	-67	0	0	0.97	0.7	0	0	0.94	0.47	synonymous_variant	exon	3	acceptor	18	-	-	-	-	-	15.16	1.29388	synonymous_variant	LOW	SDHB	NM_003000.3	protein_coding	NM_003000.3:c.219G>A	NP_002991.2:p.Leu73%3D	232	219	73	L	ttG/ttA		-1
	1	17359621	17033126	C	G	0	0.21	0	0.38		-53	19	19	-66	0	0.01	0.97	0.75	0	0	0.94	0.56	missense_variant	exon	3	acceptor	19	-	-	-	-	-	32	4.46045	missense_variant	MODERATE	SDHB	NM_003000.3	protein_coding	NM_003000.3:c.220G>C	NP_002991.2:p.Asp74His	233	220	74	D/H	Gat/Cat		-1	deleterious(0)
	1	17359621	17033126	C	A	0	0.41	0	0.62		-53	19	19	-66	0	0.01	0.97	0.56	0	0	0.94	0.33	missense_variant	exon	3	acceptor	19	-	-	-	-	-	33	4.88722	missense_variant	MODERATE	SDHB	NM_003000.3	protein_coding	NM_003000.3:c.220G>T	NP_002991.2:p.Asp74Tyr	233	220	74	D/Y	Gat/Tat		-1	deleterious(0)
	1	17359621	17033126	C	T	0	0.18	0	0.35		-53	19	-210	-66	0	0	0.97	0.79	0.03	0.03	0.94	0.59	missense_variant	exon	3	acceptor	19	-	-	-	-	-	32	4.4047	missense_variant	MODERATE	SDHB	NM_003000.3	protein_coding	NM_003000.3:c.220G>A	NP_002991.2:p.Asp74Asn	233	220	74	D/N	Gat/Aat	rs1570951468	-1	deleterious(0)
	1	17359620	17033125	T	C	0	0.26	0	0.42		-52	20	20	-65	0	0	0.97	0.71	0	0	0.94	0.52	missense_variant	exon	3	acceptor	20	-	-	-	-	-	33	4.80378	missense_variant	MODERATE	SDHB	NM_003000.3	protein_coding	NM_003000.3:c.221A>G	NP_002991.2:p.Asp74Gly	234	221	74	D/G	gAt/gGt		-1	deleterious(0)
	1	17359620	17033125	T	A	0	0.2	0	0.37		-52	20	20	-65	0	0.01	0.97	0.76	0	0	0.94	0.57	missense_variant	exon	3	acceptor	20	-	-	-	-	-	32	4.54985	missense_variant	MODERATE	SDHB	NM_003000.3	protein_coding	NM_003000.3:c.221A>T	NP_002991.2:p.Asp74Val	234	221	74	D/V	gAt/gTt	rs876658713	-1	deleterious(0)
	1	17359610	17033115	G	A	0	0.22	0	0.38		-42	30	30	-55	0	0.01	0.97	0.74	0	0	0.94	0.56	synonymous_variant	exon	3	acceptor	30	-	-	-	-	-	16.07	1.46543	synonymous_variant	LOW	SDHB	NM_003000.3	protein_coding	NM_003000.3:c.231C>T	NP_002991.2:p.Ile77%3D	244	231	77	I	atC/atT		-1
yes	1	17359609	17033114	T	A	0	0.57	0	0.71	0.71	-3	31	31	-54	0	0.01	0.97	0.4	0	0	0.94	0.23	stop_gained	exon	3	acceptor	31	-	-	-	-	-	39	7.63434	stop_gained	HIGH	SDHB	NM_003000.3	protein_coding	NM_003000.3:c.232A>T	NP_002991.2:p.Lys78Ter	245	232	78	K/*	Aag/Tag		-1
	1	17359603	17033108	T	A	0	0.12	0	0.28		-78	37	37	-48	0	0	0.97	0.84	0	0	0.94	0.66	stop_gained	exon	3	acceptor	37	-	-	-	-	-	38	7.3972	stop_gained	HIGH	SDHB	NM_003000.3	protein_coding	NM_003000.3:c.238A>T	NP_002991.2:p.Lys80Ter	251	238	80	K/*	Aag/Tag	CM092166	-1
	1	17359597	17033102	C	A	0	0.4	0	0.57		-29	43	43	-42	0	0	0.97	0.57	0	0	0.94	0.37	stop_gained	exon	3	donor	42	-	-	-	-	-	44	8.56818	stop_gained	HIGH	SDHB	NM_003000.3	protein_coding	NM_003000.3:c.244G>T	NP_002991.2:p.Glu82Ter	257	244	82	E/*	Gaa/Taa		-1
	1	17359597	17033102	C	T	0	0.14	0	0.27		-29	43	-186	-42	0	0	0.97	0.83	0.03	0.03	0.94	0.67	missense_variant	exon	3	donor	42	-	-	-	-	-	33	4.87078	missense_variant	MODERATE	SDHB	NM_003000.3	protein_coding	NM_003000.3:c.244G>A	NP_002991.2:p.Glu82Lys	257	244	82	E/K	Gaa/Aaa		-1	deleterious(0.03)
yes	1	17359596	17033101	T	A	0	0.3	0	0.47	0.47	-71	44	44	-41	0	0	0.97	0.67	0	0	0.94	0.48	missense_variant	exon	3	donor	41	-	-	-	-	-	33	5.06233	missense_variant	MODERATE	SDHB	NM_003000.3	protein_coding	NM_003000.3:c.245A>T	NP_002991.2:p.Glu82Val	258	245	82	E/V	gAa/gTa		-1	deleterious(0)
	1	17359595	17033100	T	C	0	0.17	0	0.33		-70	45	45	-40	0	0	0.97	0.8	0	0	0.94	0.61	synonymous_variant	exon	3	donor	40	-	-	-	-	-	15.24	1.31035	synonymous_variant	LOW	SDHB	NM_003000.3	protein_coding	NM_003000.3:c.246A>G	NP_002991.2:p.Glu82%3D	259	246	82	E	gaA/gaG		-1
	1	17359572	17033077	C	T	0	0.15	0	0.28		-17	68	68	-17	0	0	0.97	0.82	0	0	0.94	0.67	missense_variant	exon	3	donor	17	-	-	-	-	-	32	4.77575	missense_variant	MODERATE	SDHB	NM_003000.3	protein_coding	NM_003000.3:c.269G>A	NP_002991.2:p.Arg90Gln	282	269	90	R/Q	cGa/cAa	rs570278423,CM092167	-1	deleterious(0)
	1	17359572	17033077	C	A	0	0.22	0	0.36		-4	68	68	-17	0	0	0.97	0.74	0	0	0.94	0.58	missense_variant	exon	3	donor	17	-	-	-	-	-	33	4.91845	missense_variant	MODERATE	SDHB	NM_003000.3	protein_coding	NM_003000.3:c.269G>T	NP_002991.2:p.Arg90Leu	282	269	90	R/L	cGa/cTa	CM092167	-1	deleterious(0)
	1	17359571	17033076	T	A	0.03	0.26	0.01	0.42		-3	69	-160	-16	0	0.03	0.97	0.71	0.03	0.03	0.94	0.53	synonymous_variant	exon	3	donor	16	-	-	-	-	-	15.93	1.43877	synonymous_variant	LOW	SDHB	NM_003000.3	protein_coding	NM_003000.3:c.270A>T	NP_002991.2:p.Arg90%3D	283	270	90	R	cgA/cgT		-1
	1	17359557	17033062	T	A	0	0.28	0.4	0.39		2	83	2	-2	0	0	0.97	0.69	0	0.4	0.94	0.55	missense_variant,splice_region_variant	exon	3	donor	2	7.962	1.635	9.597	0.993812877667047	0.76	34	5.5846	missense_variant,splice_region_variant	MODERATE	SDHB	NM_003000.3	protein_coding	NM_003000.3:c.284A>T	NP_002991.2:p.Glu95Val	297	284	95	E/V	gAa/gTa		-1	deleterious(0.02)
	1	17359556	17033061	T	C	0	0.28	0.03	0.42		-1	84	-145	-1	0	0	0.97	0.69	0.03	0.06	0.94	0.52	splice_region_variant,synonymous_variant	exon	3	donor	1	7.746	1.851	9.597	0.875030536855177	0.464	20.3	2.06485	splice_region_variant,synonymous_variant	LOW	SDHB	NM_003000.3	protein_coding	NM_003000.3:c.285A>G	NP_002991.2:p.Glu95%3D	298	285	95	E	gaA/gaG	rs1570951353	-1
	1	17359556	17033061	T	A	0	0.14	0.07	0.29		-31	84	-145	-1	0	0	0.97	0.83	0.03	0.1	0.94	0.65	missense_variant,splice_region_variant	exon	3	donor	1	8.272	1.325	9.597	0.999588113189203	0.966	31	4.36022	missense_variant,splice_region_variant	MODERATE	SDHB	NM_003000.3	protein_coding	NM_003000.3:c.285A>T	NP_002991.2:p.Glu95Asp	298	285	95	E/D	gaA/gaT		-1	deleterious(0)
yes	1	17359555	17033060	C	G	0	0.67	0.19	0.8	0.8	-109	85	-144	0	0	0	0.97	0.3	0.03	0.22	0.94	0.14	missense_variant,splice_region_variant	exon	3	donor	0	6.058	3.540	9.597	0.999992274074931	0.994	34	5.78552	missense_variant,splice_region_variant	MODERATE	SDHB	NM_003000.3	protein_coding	NM_003000.3:c.286G>C	NP_002991.2:p.Gly96Arg	299	286	96	G/R	Ggc/Cgc	CM100062,COSV100973384	-1	deleterious(0)
	1	17359555	17033060	C	A	0	0.66	0.13	0.77		-30	85	-144	0	0	0	0.97	0.31	0.03	0.15	0.94	0.17	missense_variant,splice_region_variant	exon	3	donor	0	5.198	4.399	9.597	0.999892185043135	0.99	35	5.99639	missense_variant,splice_region_variant	MODERATE	SDHB	NM_003000.3	protein_coding	NM_003000.3:c.286G>T	NP_002991.2:p.Gly96Cys	299	286	96	G/C	Ggc/Tgc	CM100062,COSV100973384	-1	deleterious(0)
	1	17359555	17033060	C	T	0	0.7	0.12	0.77		-30	85	-144	0	0	0	0.97	0.27	0.03	0.15	0.94	0.18	missense_variant,splice_region_variant	exon	3	donor	0	5.890	3.707	9.597	0.999917596817853	0.994	34	5.83277	missense_variant,splice_region_variant	MODERATE	SDHB	NM_003000.3	protein_coding	NM_003000.3:c.286G>A	NP_002991.2:p.Gly96Ser	299	286	96	G/S	Ggc/Agc	rs587782243,CM100062,COSV100973384	-1	deleterious(0)
yes	1	17359554	17033059	C	T	0	0.74	0.33	0.94	0.94	-108	86	-143	1	0	0	0.97	0.23	0.03	0.36	0.94	0	splice_donor_variant	intron	3	donor	1	1.415	8.182	9.597	0.999974652436666	0.938	32	4.58868	splice_donor_variant	HIGH	SDHB	NM_003000.3	protein_coding	NM_003000.3:c.286+1G>A							rs786201063,CS062097	-1
	1	17359554	17033059	C	A	0	0.81	0.21	0.94		-29	86	-143	1	0	0	0.97	0.15	0.03	0.24	0.94	0	splice_donor_variant	intron	3	donor	1	1.093	8.504	9.597	0.999986467605894	0.934	32	4.76581	splice_donor_variant	HIGH	SDHB	NM_003000.3	protein_coding	NM_003000.3:c.286+1G>T							CS062097	-1
	1	17359554	17033059	C	G	0	0.77	0.27	0.94		-29	86	-143	1	0	0	0.97	0.2	0.03	0.3	0.94	0	splice_donor_variant	intron	3	donor	1	1.324	8.273	9.597	0.999986467605894	0.932	32	4.62027	splice_donor_variant	HIGH	SDHB	NM_003000.3	protein_coding	NM_003000.3:c.286+1G>C							CS062097	-1
yes	1	17359553	17033058	A	T	0	0.78	0.27	0.94	0.94	-107	87	-142	2	0	0	0.97	0.19	0.03	0.3	0.94	0	splice_donor_variant	intron	3	donor	2	1.414	8.183	9.597	0.99994568797423	0.934	33	5.16257	splice_donor_variant	HIGH	SDHB	NM_003000.3	protein_coding	NM_003000.3:c.286+2T>A							rs587781270,CS065617	-1
	1	17359553	17033058	A	C	0	0.84	0.2	0.94		-107	87	-142	2	0	0	0.97	0.13	0.03	0.23	0.94	0	splice_donor_variant	intron	3	donor	2	1.950	7.647	9.597	0.99994568797423	0.944	33	5.13483	splice_donor_variant	HIGH	SDHB	NM_003000.3	protein_coding	NM_003000.3:c.286+2T>G							CS065617	-1
	1	17359553	17033058	A	G	0	0.79	0.26	0.94		-107	87	-142	2	0	0	0.97	0.18	0.03	0.29	0.94	0.01	splice_donor_variant	intron	3	donor	2	1.843	7.754	9.597	0.999759796550676	0.922	32	4.62274	splice_donor_variant	HIGH	SDHB	NM_003000.3	protein_coding	NM_003000.3:c.286+2T>C							CS065617	-1
yes	1	17359552	17033057	C	G	0	0.55	0.11	0.67	0.67	3	88	-141	3	0	0	0.97	0.41	0.03	0.13	0.94	0.28	splice_donor_region_variant,intron_variant	intron	3	donor	3	7.094	2.503	9.597	0.031941122823882	0.292	11.75	0.77418	splice_donor_region_variant,intron_variant	LOW	SDHB	NM_003000.3	protein_coding	NM_003000.3:c.286+3G>C								-1
	1	17359552	17033057	C	A	0	0.49	0.02	0.6		3	88	-141	3	0	0	0.97	0.48	0.03	0.05	0.94	0.34	splice_donor_region_variant,intron_variant	intron	3	donor	3	5.610	3.987	9.597	0.25154176238687	0.344	12.02	0.808666	splice_donor_region_variant,intron_variant	LOW	SDHB	NM_003000.3	protein_coding	NM_003000.3:c.286+3G>T								-1
yes	1	17359551	17033056	T	A	0	0.68	0.14	0.78	0.78	4	89	-140	4	0	0	0.97	0.29	0.03	0.16	0.94	0.16	splice_donor_region_variant,intron_variant	intron	3	donor	4	6.302	3.295	9.597	0.948258610559002	0.558	20.3	2.05875	splice_donor_region_variant,intron_variant	LOW	SDHB	NM_003000.3	protein_coding	NM_003000.3:c.286+4A>T								-1
	1	17359551	17033056	T	C	0	0.46	0.05	0.61		4	89	-140	4	0	0	0.97	0.51	0.03	0.08	0.94	0.33	splice_donor_region_variant,intron_variant	intron	3	donor	4	7.926	1.671	9.597	0.437323769400544	0.392	17.44	1.69412	splice_donor_region_variant,intron_variant	LOW	SDHB	NM_003000.3	protein_coding	NM_003000.3:c.286+4A>G								-1
	1	17359551	17033056	T	G	0	0.4	0.12	0.58		4	89	-140	4	0	0	0.97	0.56	0.03	0.14	0.94	0.36	splice_donor_region_variant,intron_variant	intron	3	donor	4	9.046	0.551	9.597	0.824199476399086	0.492	17.57	1.71276	splice_donor_region_variant,intron_variant	LOW	SDHB	NM_003000.3	protein_coding	NM_003000.3:c.286+4A>C								-1
yes	1	17359550	17033055	C	G	0	0.65	0.17	0.78	0.78	-25	90	-139	5	0	0	0.97	0.31	0.03	0.2	0.94	0.16	splice_donor_5th_base_variant,intron_variant	intron	3	donor	5	6.776	2.821	9.597	0.975825014332563	0.714	21.3	2.18863	splice_donor_5th_base_variant,intron_variant	LOW	SDHB	NM_003000.3	protein_coding	NM_003000.3:c.286+5G>C							rs768966871	-1
	1	17359550	17033055	C	A	0	0.63	0.14	0.75		-25	90	-139	5	0	0	0.97	0.34	0.03	0.16	0.94	0.19	splice_donor_5th_base_variant,intron_variant	intron	3	donor	5	4.415	5.182	9.597	0.99840343733614	0.912	21.9	2.27267	splice_donor_5th_base_variant,intron_variant	LOW	SDHB	NM_003000.3	protein_coding	NM_003000.3:c.286+5G>T								-1
	1	17359550	17033055	C	T	0	0.57	0.17	0.74		-25	90	-139	5	0	0	0.97	0.4	0.03	0.19	0.94	0.21	splice_donor_5th_base_variant,intron_variant	intron	3	donor	5	5.535	4.062	9.597	0.998776899427921	0.862	21.9	2.27196	splice_donor_5th_base_variant,intron_variant	LOW	SDHB	NM_003000.3	protein_coding	NM_003000.3:c.286+5G>A								-1
	1	17359406	17032911	T	C	0.02	0	0.51	0.07		119	234	5	149	0	0.02	0.97	0.96	0.03	0.54	0.94	0.88	intron_variant	intron	3	donor	149	-	-	-	-	-	7.576	0.328595	intron_variant	MODIFIER	SDHB	NM_003000.3	protein_coding	NM_003000.3:c.286+149A>G								-1
	1	17355249	17028754	T	C	0.02	0.41	0	0.4		-1	-18	-1280	-129	0	0.02	0.94	0.53	0	0	0.73	0.33	intron_variant	intron	3	acceptor	18	9.334	1.437	10.770	-	-	8.561	0.415326	intron_variant	MODIFIER	SDHB	NM_003000.3	protein_coding	NM_003000.3:c.287-18A>G								-1
	1	17355245	17028750	A	T	0	0.26	0	0.26		-2	-14	-1159	-125	0	0	0.94	0.68	0.3	0.31	0.73	0.46	splice_polypyrimidine_tract_variant,intron_variant	intron	3	acceptor	14	6.269	4.501	10.770	-	-	15.96	1.44558	splice_polypyrimidine_tract_variant,intron_variant	LOW	SDHB	NM_003000.3	protein_coding	NM_003000.3:c.287-14T>A								-1
yes	1	17355243	17028748	A	T	0	0.51	0.01	0.49	0.51	-2	-12	4	-123	0	0	0.94	0.43	0	0.01	0.73	0.24	splice_polypyrimidine_tract_variant,intron_variant	intron	3	acceptor	12	3.320	7.450	10.770	0.999908084265651	0.954	23.7	3.07609	splice_polypyrimidine_tract_variant,intron_variant	LOW	SDHB	NM_003000.3	protein_coding	NM_003000.3:c.287-12T>A								-1
	1	17355243	17028748	A	C	0	0.32	0	0.35		-137	-12	-1130	-123	0	0	0.94	0.62	0	0	0.73	0.37	splice_polypyrimidine_tract_variant,intron_variant	intron	3	acceptor	12	7.815	2.955	10.770	0.988252948280616	0.87	22.7	2.58582	splice_polypyrimidine_tract_variant,intron_variant	LOW	SDHB	NM_003000.3	protein_coding	NM_003000.3:c.287-12T>G								-1
yes	1	17355241	17028746	A	C	0	0.65	0	0.58	0.65	-146	-10	-1128	-121	0	0	0.94	0.29	0	0	0.73	0.15	splice_polypyrimidine_tract_variant,intron_variant	intron	3	acceptor	10	7.974	2.796	10.770	0.970815649840368	0.74	23.9	3.14212	splice_polypyrimidine_tract_variant,intron_variant	LOW	SDHB	NM_003000.3	protein_coding	NM_003000.3:c.287-10T>G								-1
	1	17355241	17028746	A	G	0	0.41	0	0.4		-135	-10	-1128	-121	0	0	0.94	0.53	0	0	0.73	0.33	splice_polypyrimidine_tract_variant,intron_variant	intron	3	acceptor	10	9.013	1.758	10.770	0.0106126339042153	0.146	20.8	2.11574	splice_polypyrimidine_tract_variant,intron_variant	LOW	SDHB	NM_003000.3	protein_coding	NM_003000.3:c.287-10T>C								-1
	1	17355241	17028746	A	T	0	0.48	0	0.47		-135	-10	-1128	-121	0	0	0.94	0.46	0	0	0.73	0.25	splice_polypyrimidine_tract_variant,intron_variant	intron	3	acceptor	10	7.787	2.983	10.770	0.980528734835488	0.722	23	2.72888	splice_polypyrimidine_tract_variant,intron_variant	LOW	SDHB	NM_003000.3	protein_coding	NM_003000.3:c.287-10T>A								-1
yes	1	17355239	17028744	A	C	0	0.51	0	0.47	0.51	-133	-8	-1126	-119	0	0	0.94	0.43	0	0	0.73	0.26	splice_region_variant,splice_polypyrimidine_tract_variant,intron_variant	intron	3	acceptor	8	9.543	1.227	10.770	0.490957145265931	0.41	18.54	1.84497	splice_polypyrimidine_tract_variant,splice_region_variant,intron_variant	LOW	SDHB	NM_003000.3	protein_coding	NM_003000.3:c.287-8T>G								-1
	1	17355239	17028744	A	G	0	0.34	0	0.33		-133	-8	-1126	-119	0	0	0.94	0.6	0	0	0.73	0.4	splice_region_variant,splice_polypyrimidine_tract_variant,intron_variant	intron	3	acceptor	8	9.958	0.812	10.770	0.0125545060982509	0.09	15.21	1.3036	splice_polypyrimidine_tract_variant,splice_region_variant,intron_variant	LOW	SDHB	NM_003000.3	protein_coding	NM_003000.3:c.287-8T>C								-1
	1	17355239	17028744	A	T	0	0.48	0	0.45		-133	-8	-1126	-119	0	0	0.94	0.46	0	0	0.73	0.27	splice_region_variant,splice_polypyrimidine_tract_variant,intron_variant	intron	3	acceptor	8	9.165	1.605	10.770	0.791572052433605	0.43	18.53	1.84349	splice_polypyrimidine_tract_variant,splice_region_variant,intron_variant	LOW	SDHB	NM_003000.3	protein_coding	NM_003000.3:c.287-8T>A								-1
yes	1	17355237	17028742	A	C	0	0.67	0	0.57	0.67	-131	-6	-1124	-142	0	0	0.94	0.28	0	0	0.97	0.4	splice_region_variant,splice_polypyrimidine_tract_variant,intron_variant	intron	3	acceptor	6	7.917	2.854	10.770	0.392975141776362	0.516	18.64	1.85787	splice_polypyrimidine_tract_variant,splice_region_variant,intron_variant	LOW	SDHB	NM_003000.3	protein_coding	NM_003000.3:c.287-6T>G								-1
	1	17355237	17028742	A	G	0	0.51	0	0.42		-131	-6	-1124	-117	0	0	0.94	0.43	0	0	0.73	0.31	splice_region_variant,splice_polypyrimidine_tract_variant,intron_variant	intron	3	acceptor	6	9.635	1.135	10.770	9.78016544371047E-6	0.044	15.14	1.2911	splice_polypyrimidine_tract_variant,splice_region_variant,intron_variant	LOW	SDHB	NM_003000.3	protein_coding	NM_003000.3:c.287-6T>C								-1
	1	17355237	17028742	A	T	0	0.6	0	0.55		-42	-6	-1124	-117	0	0	0.94	0.34	0	0	0.73	0.18	splice_region_variant,splice_polypyrimidine_tract_variant,intron_variant	intron	3	acceptor	6	8.322	2.449	10.770	0.435373061828745	0.424	18.81	1.88039	splice_polypyrimidine_tract_variant,splice_region_variant,intron_variant	LOW	SDHB	NM_003000.3	protein_coding	NM_003000.3:c.287-6T>A								-1
yes	1	17355236	17028741	A	C	0	0.81	0	0.8	0.81	-141	-5	28	-141	0	0	0.94	0.13	0.02	0.02	0.97	0.17	splice_region_variant,splice_polypyrimidine_tract_variant,intron_variant	intron	3	acceptor	5	7.082	3.688	10.770	0.949237921501636	0.54	21.2	2.17476	splice_polypyrimidine_tract_variant,splice_region_variant,intron_variant	LOW	SDHB	NM_003000.3	protein_coding	NM_003000.3:c.287-5T>G								-1
	1	17355236	17028741	A	T	0	0.71	0	0.64		-141	-5	28	-141	0	0	0.94	0.23	0.02	0.02	0.97	0.32	splice_region_variant,splice_polypyrimidine_tract_variant,intron_variant	intron	3	acceptor	5	8.057	2.714	10.770	0.971370704199617	0.532	20	2.03344	splice_polypyrimidine_tract_variant,splice_region_variant,intron_variant	LOW	SDHB	NM_003000.3	protein_coding	NM_003000.3:c.287-5T>A								-1
	1	17355236	17028741	A	G	0	0.54	0	0.5		-130	-5	-1123	-116	0	0	0.94	0.4	0	0	0.73	0.22	splice_region_variant,splice_polypyrimidine_tract_variant,intron_variant	intron	3	acceptor	5	9.041	1.729	10.770	7.93135518543492E-5	0.052	15.06	1.27506	splice_polypyrimidine_tract_variant,splice_region_variant,intron_variant	LOW	SDHB	NM_003000.3	protein_coding	NM_003000.3:c.287-5T>C								-1
yes	1	17355234	17028739	G	C	0	0.94	0	0.94	0.94	351	-3	30	-139	0	0	0.94	0.01	0.02	0.02	0.97	0.02	splice_region_variant,splice_polypyrimidine_tract_variant,intron_variant	intron	3	acceptor	3	1.888	8.882	10.770	0.99989735417466	0.962	25.1	3.53395	splice_polypyrimidine_tract_variant,splice_region_variant,intron_variant	LOW	SDHB	NM_003000.3	protein_coding	NM_003000.3:c.287-3C>G							rs1553177772,CD132776,CS132213	-1
	1	17355234	17028739	G	T	0	0.73	0.01	0.67		-139	-3	30	-139	0	0	0.94	0.21	0.02	0.02	0.97	0.29	splice_region_variant,splice_polypyrimidine_tract_variant,intron_variant	intron	3	acceptor	3	8.139	2.631	10.770	0.880567894762622	0.608	23.1	2.75659	splice_polypyrimidine_tract_variant,splice_region_variant,intron_variant	LOW	SDHB	NM_003000.3	protein_coding	NM_003000.3:c.287-3C>A							CD132776,CS132213	-1
yes	1	17355233	17028738	T	A	0	0.94	0.02	0.95	0.95	-38	-2	31	-138	0	0	0.94	0	0.02	0.04	0.97	0.02	splice_acceptor_variant	intron	3	acceptor	2	2.403	8.367	10.770	0.999988247793601	0.932	34	5.75463	splice_acceptor_variant	HIGH	SDHB	NM_003000.3	protein_coding	NM_003000.3:c.287-2A>T							CS044766	-1
	1	17355233	17028738	T	C	0	0.94	0.02	0.95		-38	-2	31	-138	0	0	0.94	0	0.02	0.04	0.97	0.02	splice_acceptor_variant	intron	3	acceptor	2	2.815	7.955	10.770	0.999988247793601	0.932	34	5.70622	splice_acceptor_variant	HIGH	SDHB	NM_003000.3	protein_coding	NM_003000.3:c.287-2A>G							rs1064794270,CS044766	-1
	1	17355233	17028738	T	G	0	0.94	0.02	0.94		-38	-2	31	-138	0	0	0.94	0	0.02	0.04	0.97	0.03	splice_acceptor_variant	intron	3	acceptor	2	2.728	8.042	10.770	0.999988247793601	0.932	34	5.68995	splice_acceptor_variant	HIGH	SDHB	NM_003000.3	protein_coding	NM_003000.3:c.287-2A>C							CS044766	-1
yes	1	17355232	17028737	C	A	0	0.94	0.02	0.95	0.95	-37	-1	32	-137	0	0	0.94	0	0.02	0.04	0.97	0.02	splice_acceptor_variant	intron	3	acceptor	1	2.172	8.598	10.770	0.999990361384395	0.938	35	5.9254	splice_acceptor_variant	HIGH	SDHB	NM_003000.3	protein_coding	NM_003000.3:c.287-1G>T							CS071260	-1
yes	1	17355232	17028737	C	G	0	0.94	0.02	0.95	0.95	-37	-1	32	-137	0	0	0.94	0	0.02	0.04	0.97	0.02	splice_acceptor_variant	intron	3	acceptor	1	2.706	8.064	10.770	0.999990361384395	0.938	34	5.80097	splice_acceptor_variant	HIGH	SDHB	NM_003000.3	protein_coding	NM_003000.3:c.287-1G>C							rs397516833,CS071260	-1
	1	17355232	17028737	C	T	0.11	0.94	0.01	0.78		-2	-1	32	-137	0	0.11	0.94	0	0.02	0.02	0.97	0.19	splice_acceptor_variant	intron	3	acceptor	1	2.020	8.750	10.770	0.999990361384395	0.938	35	6.03101	splice_acceptor_variant	HIGH	SDHB	NM_003000.3	protein_coding	NM_003000.3:c.287-1G>A							CS071260	-1
yes	1	17355231	17028736	C	A	0	0.44	0.01	0.39	0.44	-36	0	33	-111	0	0	0.94	0.5	0.02	0.03	0.73	0.34	missense_variant,splice_region_variant	exon	4	acceptor	0	9.251	1.519	10.770	0.999623887579555	0.99	34	5.76413	missense_variant,splice_region_variant	MODERATE	SDHB	NM_003000.3	protein_coding	NM_003000.3:c.287G>T	NP_002991.2:p.Gly96Val	300	287	96	G/V	gGc/gTc	CM061960,COSV64965020	-1	deleterious(0)
	1	17355228	17028733	A	C	0.39	0.08	0	0.04		-1	3	-999	-108	0	0.39	0.94	0.86	0.01	0.01	0.73	0.68	missense_variant	exon	4	acceptor	3	-	-	-	-	-	32	4.59769	missense_variant	MODERATE	SDHB	NM_003000.3	protein_coding	NM_003000.3:c.290T>G	NP_002991.2:p.Ile97Ser	303	290	97	I/S	aTc/aGc		-1	deleterious(0)
	1	17355199	17028704	C	A	0	0.36	0.01	0.36		-93	32	65	-79	0	0	0.94	0.58	0.02	0.03	0.73	0.36	stop_gained	exon	4	acceptor	32	-	-	-	-	-	44	8.60875	stop_gained	HIGH	SDHB	NM_003000.3	protein_coding	NM_003000.3:c.319G>T	NP_002991.2:p.Gly107Ter	332	319	107	G/*	Gga/Tga		-1
	1	17355198	17028703	C	A	0	0.33	0.01	0.37		-3	33	66	-78	0	0	0.94	0.61	0.02	0.02	0.73	0.36	missense_variant	exon	4	acceptor	33	-	-	-	-	-	33	5.12939	missense_variant	MODERATE	SDHB	NM_003000.3	protein_coding	NM_003000.3:c.320G>T	NP_002991.2:p.Gly107Val	333	320	107	G/V	gGa/gTa	COSV104685773	-1	deleterious(0)
yes	1	17355153	17028658	T	C	0	0.01	0.92	0.34	0.92	934	78	1	-33	0.01	0.01	0.94	0.93	0	0.92	0.73	0.39	missense_variant	exon	4	donor	58	-	-	-	-	-	18.92	1.89453	missense_variant	MODERATE	SDHB	NM_003000.3	protein_coding	NM_003000.3:c.365A>G	NP_002991.2:p.Asn122Ser	378	365	122	N/S	aAt/aGt	rs1557741472	-1	tolerated(1)
	1	17355151	17028656	T	C	0.03	0	0.13	0.27		80	-2	-31	-2	0.94	0.97	0	0	0.73	0.86	0.34	0.08	missense_variant	exon	4	donor	56	-	-	-	-	-	23.6	3.00942	missense_variant	MODERATE	SDHB	NM_003000.3	protein_coding	NM_003000.3:c.367A>G	NP_002991.2:p.Lys123Glu	380	367	123	K/E	Aag/Gag	rs1570948588	-1	tolerated(0.13)
	1	17355151	17028656	T	A	0	0.34	0.02	0.31		-3	80	113	-2	0	0	0.94	0.6	0.02	0.03	0.34	0.04	stop_gained	exon	4	donor	56	-	-	-	-	-	40	8.03967	stop_gained	HIGH	SDHB	NM_003000.3	protein_coding	NM_003000.3:c.367A>T	NP_002991.2:p.Lys123Ter	380	367	123	K/*	Aag/Tag		-1
	1	17355150	17028655	T	G	0.03	0	0.18	0.34		81	-790	-30	-1	0.94	0.97	0.93	0.93	0.73	0.91	0.34	0	missense_variant	exon	4	donor	55	-	-	-	-	-	26.1	3.75948	missense_variant	MODERATE	SDHB	NM_003000.3	protein_coding	NM_003000.3:c.368A>C	NP_002991.2:p.Lys123Thr	381	368	123	K/T	aAg/aCg	rs1557741464	-1	deleterious(0.05)
	1	17355150	17028655	T	C	0	0.08	0.02	0.34		-1	81	-30	-1	0	0	0.94	0.86	0.73	0.75	0.34	0	missense_variant	exon	4	donor	55	-	-	-	-	-	24.5	3.35438	missense_variant	MODERATE	SDHB	NM_003000.3	protein_coding	NM_003000.3:c.368A>G	NP_002991.2:p.Lys123Arg	381	368	123	K/R	aAg/aGg		-1	tolerated(0.09)
	1	17355150	17028655	T	A	0.02	0.01	0.15	0.34		81	-790	-30	-1	0.94	0.96	0.93	0.92	0.73	0.87	0.34	0	missense_variant	exon	4	donor	55	-	-	-	-	-	32	4.76638	missense_variant	MODERATE	SDHB	NM_003000.3	protein_coding	NM_003000.3:c.368A>T	NP_002991.2:p.Lys123Met	381	368	123	K/M	aAg/aTg		-1	deleterious(0)
	1	17355149	17028654	C	G	0.04	0	0.17	0.34		-215	0	-29	0	0.24	0.29	0	0	0.73	0.9	0.34	0	missense_variant	exon	4	donor	54	-	-	-	-	-	25.5	3.62792	missense_variant	MODERATE	SDHB	NM_003000.3	protein_coding	NM_003000.3:c.369G>C	NP_002991.2:p.Lys123Asn	382	369	123	K/N	aaG/aaC		-1	deleterious(0.02)
	1	17355149	17028654	C	T	0	0.01	0.1	0.34		82	-789	-29	0	0.94	0.94	0.93	0.92	0.73	0.83	0.34	0	synonymous_variant	exon	4	donor	54	-	-	-	-	-	16.33	1.5108	synonymous_variant	LOW	SDHB	NM_003000.3	protein_coding	NM_003000.3:c.369G>A	NP_002991.2:p.Lys123%3D	382	369	123	K	aaG/aaA		-1
	1	17355149	17028654	C	A	0	0.01	0.11	0.34		-215	-789	-29	0	0.24	0.25	0.93	0.92	0.73	0.83	0.34	0	missense_variant	exon	4	donor	54	-	-	-	-	-	26.2	3.78689	missense_variant	MODERATE	SDHB	NM_003000.3	protein_coding	NM_003000.3:c.369G>T	NP_002991.2:p.Lys123Asn	382	369	123	K/N	aaG/aaT		-1	deleterious(0.02)
	1	17355148	17028653	C	A	0	0.04	0.05	0.34		-42	83	-28	1	0	0	0.94	0.9	0.73	0.78	0.34	0	missense_variant	exon	4	donor	53	-	-	-	-	-	25.8	3.71223	missense_variant	MODERATE	SDHB	NM_003000.3	protein_coding	NM_003000.3:c.370G>T	NP_002991.2:p.Val124Phe	383	370	124	V/F	Gtc/Ttc	rs978525560,COSV64965585	-1	deleterious(0.05)
	1	17355148	17028653	C	G	0	0.02	0.11	0.34		-42	-788	-28	1	0	0	0.93	0.92	0.73	0.83	0.34	0	missense_variant	exon	4	donor	53	-	-	-	-	-	23	2.7373	missense_variant	MODERATE	SDHB	NM_003000.3	protein_coding	NM_003000.3:c.370G>C	NP_002991.2:p.Val124Leu	383	370	124	V/L	Gtc/Ctc	COSV64965585	-1	tolerated(0.28)
	1	17355148	17028653	C	T	0.04	0	0.16	0.34		-214	1	-28	1	0.24	0.28	0	0	0.73	0.89	0.34	0	missense_variant	exon	4	donor	53	-	-	-	-	-	22.9	2.70096	missense_variant	MODERATE	SDHB	NM_003000.3	protein_coding	NM_003000.3:c.370G>A	NP_002991.2:p.Val124Ile	383	370	124	V/I	Gtc/Atc	COSV64965585	-1	tolerated(0.21)
	1	17355147	17028652	A	T	0.05	0	0.19	0.34		-213	2	-27	2	0.24	0.3	0	0	0.73	0.92	0.34	0	missense_variant	exon	4	donor	52	-	-	-	-	-	23	2.71951	missense_variant	MODERATE	SDHB	NM_003000.3	protein_coding	NM_003000.3:c.371T>A	NP_002991.2:p.Val124Asp	384	371	124	V/D	gTc/gAc		-1	tolerated(0.68)
	1	17355147	17028652	A	G	0.05	0	0.15	0.34		-213	2	-27	2	0.24	0.29	0	0	0.73	0.88	0.34	0	missense_variant	exon	4	donor	52	-	-	-	-	-	21.9	2.27709	missense_variant	MODERATE	SDHB	NM_003000.3	protein_coding	NM_003000.3:c.371T>C	NP_002991.2:p.Val124Ala	384	371	124	V/A	gTc/gCc	rs1557741456	-1	tolerated(0.74)
	1	17355147	17028652	A	C	0.03	0	0.14	0.34		-213	-787	-27	2	0.24	0.27	0.93	0.93	0.73	0.86	0.34	0	missense_variant	exon	4	donor	52	-	-	-	-	-	23.1	2.80226	missense_variant	MODERATE	SDHB	NM_003000.3	protein_coding	NM_003000.3:c.371T>G	NP_002991.2:p.Val124Gly	384	371	124	V/G	gTc/gGc		-1	tolerated(0.35)
yes	1	17355146	17028651	G	T	0.06	0	0.65	0.88	0.88	-212	941	3	-51	0.24	0.3	0.01	0.01	0.34	1	0.97	0.09	synonymous_variant	exon	4	donor	51	-	-	-	-	-	14.56	1.18436	synonymous_variant	LOW	SDHB	NM_003000.3	protein_coding	NM_003000.3:c.372C>A	NP_002991.2:p.Val124%3D	385	372	124	V	gtC/gtA		-1
	1	17355144	17028649	G	C	0.04	0	0.61	0.25		87	-38	5	-49	0.94	0.98	0	0	0.34	0.96	0.97	0.72	stop_gained	exon	4	donor	49	-	-	-	-	-	43	8.50764	stop_gained	HIGH	SDHB	NM_003000.3	protein_coding	NM_003000.3:c.374C>G	NP_002991.2:p.Ser125Ter	387	374	125	S/*	tCa/tGa	rs786203506	-1
	1	17355143	17028648	T	A	0	0.01	0.3	0.05		-37	88	6	-48	0	0	0.94	0.93	0.34	0.65	0.97	0.92	synonymous_variant	exon	4	donor	48	-	-	-	-	-	11.48	0.740109	synonymous_variant	LOW	SDHB	NM_003000.3	protein_coding	NM_003000.3:c.375A>T	NP_002991.2:p.Ser125%3D	388	375	125	S	tcA/tcT		-1
	1	17355137	17028642	G	A	0	0.06	0.27	0.2		-16	94	12	-17	0	0	0.94	0.88	0.34	0.62	0.73	0.53	synonymous_variant	exon	4	donor	42	-	-	-	-	-	14.83	1.23254	synonymous_variant	LOW	SDHB	NM_003000.3	protein_coding	NM_003000.3:c.381C>T	NP_002991.2:p.Ile127%3D	394	381	127	I	atC/atT		-1
	1	17355134	17028639	G	C	0	0.16	0.01	0.26		-1	97	130	-14	0	0	0.94	0.78	0.02	0.03	0.73	0.47	stop_gained	exon	4	donor	39	-	-	-	-	-	39	7.84433	stop_gained	HIGH	SDHB	NM_003000.3	protein_coding	NM_003000.3:c.384C>G	NP_002991.2:p.Tyr128Ter	397	384	128	Y/*	taC/taG	COSV64965858	-1
	1	17355134	17028639	G	T	0	0.16	0.14	0.26		-13	97	15	-14	0	0	0.94	0.78	0.34	0.49	0.73	0.47	stop_gained	exon	4	donor	39	-	-	-	-	-	39	7.85944	stop_gained	HIGH	SDHB	NM_003000.3	protein_coding	NM_003000.3:c.384C>A	NP_002991.2:p.Tyr128Ter	397	384	128	Y/*	taC/taA	COSV64965858	-1
	1	17355127	17028632	G	A	0	0.09	0.3	0.15		-21	104	22	-7	0	0	0.94	0.85	0.34	0.64	0.73	0.58	missense_variant	exon	4	donor	32	-	-	-	-	-	29.8	4.2471	missense_variant	MODERATE	SDHB	NM_003000.3	protein_coding	NM_003000.3:c.391C>T	NP_002991.2:p.Pro131Ser	404	391	131	P/S	Cca/Tca	COSV64965236	-1	deleterious(0)
	1	17355126	17028631	G	C	0.05	0	0.16	0.27		-192	961	-6	23	0.24	0.3	0.01	0.01	0.73	0.88	0.34	0.07	missense_variant	exon	4	donor	31	-	-	-	-	-	27.9	4.02103	missense_variant	MODERATE	SDHB	NM_003000.3	protein_coding	NM_003000.3:c.392C>G	NP_002991.2:p.Pro131Arg	405	392	131	P/R	cCa/cGa	CD044987,CM020512	-1	deleterious(0)
	1	17355124	17028629	G	C	0.06	0	0.09	0.27		-190	-18	-4	25	0.24	0.3	0	0	0.73	0.82	0.34	0.08	missense_variant	exon	4	donor	29	-	-	-	-	-	28.5	4.09281	missense_variant	MODERATE	SDHB	NM_003000.3	protein_coding	NM_003000.3:c.394C>G	NP_002991.2:p.His132Asp	407	394	132	H/D	Cac/Gac		-1	deleterious(0)
	1	17355122	17028627	G	A	0	0.03	0.11	0.32		-16	109	27	-2	0	0	0.94	0.91	0.34	0.45	0.73	0.41	synonymous_variant	exon	4	donor	27	-	-	-	-	-	9.182	0.476783	synonymous_variant	LOW	SDHB	NM_003000.3	protein_coding	NM_003000.3:c.396C>T	NP_002991.2:p.His132%3D	409	396	132	H	caC/caT		-1
	1	17355121	17028626	T	A	0	0.01	0.09	0.44		-1	110	28	-1	0	0	0.94	0.93	0.34	0.43	0.73	0.28	missense_variant	exon	4	donor	26	-	-	-	-	-	23	2.74624	missense_variant	MODERATE	SDHB	NM_003000.3	protein_coding	NM_003000.3:c.397A>T	NP_002991.2:p.Met133Leu	410	397	133	M/L	Atg/Ttg		-1	tolerated(0.06)
	1	17355121	17028626	T	G	0.04	0	0.02	0.43		-187	966	-26	-1	0.24	0.28	0.01	0.01	0.97	0.99	0.73	0.29	missense_variant	exon	4	donor	26	-	-	-	-	-	22.9	2.67567	missense_variant	MODERATE	SDHB	NM_003000.3	protein_coding	NM_003000.3:c.397A>C	NP_002991.2:p.Met133Leu	410	397	133	M/L	Atg/Ctg		-1	tolerated(0.06)
	1	17355121	17028626	T	C	0.03	0	0.02	0.3		110	-15	-26	-1	0.94	0.97	0	0	0.97	0.99	0.73	0.43	missense_variant	exon	4	donor	26	-	-	-	-	-	25.4	3.62296	missense_variant	MODERATE	SDHB	NM_003000.3	protein_coding	NM_003000.3:c.397A>G	NP_002991.2:p.Met133Val	410	397	133	M/V	Atg/Gtg	rs1392546433	-1	deleterious(0)
yes	1	17355120	17028625	A	C	0.05	0	0.27	0.94	0.94	111	967	0	-25	0.94	0.99	0.01	0.01	0.73	1	0.97	0.03	missense_variant	exon	4	donor	25	-	-	-	-	-	33	5.07038	missense_variant	MODERATE	SDHB	NM_003000.3	protein_coding	NM_003000.3:c.398T>G	NP_002991.2:p.Met133Arg	411	398	133	M/R	aTg/aGg		-1	deleterious(0)
yes	1	17355119	17028624	C	G	0.05	0	0.03	0.73	0.73	-185	-624	-24	1	0.24	0.3	0.01	0.01	0.97	1	0.73	0	missense_variant	exon	4	donor	24	-	-	-	-	-	27.7	4.0006	missense_variant	MODERATE	SDHB	NM_003000.3	protein_coding	NM_003000.3:c.399G>C	NP_002991.2:p.Met133Ile	412	399	133	M/I	atG/atC	COSV64965981	-1	deleterious(0)
	1	17355119	17028624	C	T	0	0.06	0.01	0.73		-13	112	30	1	0	0	0.94	0.88	0.34	0.35	0.73	0	missense_variant	exon	4	donor	24	-	-	-	-	-	28.3	4.06626	missense_variant	MODERATE	SDHB	NM_003000.3	protein_coding	NM_003000.3:c.399G>A	NP_002991.2:p.Met133Ile	412	399	133	M/I	atG/atA	COSV64965981	-1	deleterious(0)
	1	17355119	17028624	C	A	0	0.04	0.02	0.73		-13	112	30	1	0	0	0.94	0.9	0.34	0.37	0.73	0	missense_variant	exon	4	donor	24	-	-	-	-	-	27.9	4.02502	missense_variant	MODERATE	SDHB	NM_003000.3	protein_coding	NM_003000.3:c.399G>T	NP_002991.2:p.Met133Ile	412	399	133	M/I	atG/atT	rs201403014,COSV64965981	-1	deleterious(0)
yes	1	17355118	17028623	A	C	0.07	0	0.03	0.73	0.73	-184	969	-23	2	0.24	0.31	0.01	0.01	0.97	1	0.73	0	missense_variant	exon	4	donor	23	-	-	-	-	-	29.1	4.15985	missense_variant	MODERATE	SDHB	NM_003000.3	protein_coding	NM_003000.3:c.400T>G	NP_002991.2:p.Tyr134Asp	413	400	134	Y/D	Tat/Gat		-1	deleterious(0.04)
	1	17355118	17028623	A	G	0.04	0	0.02	0.73		-184	-623	-23	2	0.24	0.28	0.01	0.01	0.97	0.99	0.73	0	missense_variant	exon	4	donor	23	-	-	-	-	-	28.2	4.0561	missense_variant	MODERATE	SDHB	NM_003000.3	protein_coding	NM_003000.3:c.400T>C	NP_002991.2:p.Tyr134His	413	400	134	Y/H	Tat/Cat	rs771004483	-1	deleterious(0.04)
	1	17355118	17028623	A	T	0.06	0	0.03	0.73		-184	-623	-23	2	0.24	0.3	0.01	0.01	0.97	1	0.73	0	missense_variant	exon	4	donor	23	-	-	-	-	-	29	4.14855	missense_variant	MODERATE	SDHB	NM_003000.3	protein_coding	NM_003000.3:c.400T>A	NP_002991.2:p.Tyr134Asn	413	400	134	Y/N	Tat/Aat		-1	deleterious(0.04)
yes	1	17355117	17028622	T	A	0.02	0	0.02	0.72	0.72	-183	-622	-22	3	0.24	0.26	0.01	0.01	0.97	0.99	0.73	0.01	missense_variant	exon	4	donor	22	-	-	-	-	-	23.1	2.80319	missense_variant	MODERATE	SDHB	NM_003000.3	protein_coding	NM_003000.3:c.401A>T	NP_002991.2:p.Tyr134Phe	414	401	134	Y/F	tAt/tTt		-1	tolerated(0.16)
	1	17355117	17028622	T	C	0	0.01	0.02	0.65		-183	-757	-22	3	0.24	0.25	0.93	0.92	0.97	0.99	0.73	0.08	missense_variant	exon	4	donor	22	-	-	-	-	-	29.4	4.1896	missense_variant	MODERATE	SDHB	NM_003000.3	protein_coding	NM_003000.3:c.401A>G	NP_002991.2:p.Tyr134Cys	414	401	134	Y/C	tAt/tGt	rs200893429	-1	deleterious(0.01)
	1	17355117	17028622	T	G	0.04	0	0.02	0.72		-183	-622	-22	3	0.24	0.28	0.01	0.01	0.97	0.99	0.73	0	missense_variant	exon	4	donor	22	-	-	-	-	-	28.7	4.10944	missense_variant	MODERATE	SDHB	NM_003000.3	protein_coding	NM_003000.3:c.401A>C	NP_002991.2:p.Tyr134Ser	414	401	134	Y/S	tAt/tCt		-1	deleterious(0.04)
yes	1	17355116	17028621	A	T	0.05	0	0.27	0.81	0.81	115	-10	4	-21	0.94	0.99	0	0	0.73	1	0.97	0.16	stop_gained	exon	4	donor	21	-	-	-	-	-	43	8.46622	stop_gained	HIGH	SDHB	NM_003000.3	protein_coding	NM_003000.3:c.402T>A	NP_002991.2:p.Tyr134Ter	415	402	134	Y/*	taT/taA		-1
yes	1	17355115	17028620	C	A	0	0.08	0.13	0.72	0.72	-9	116	34	5	0	0	0.94	0.86	0.34	0.48	0.73	0	missense_variant	exon	4	donor	20	-	-	-	-	-	28	4.04011	missense_variant	MODERATE	SDHB	NM_003000.3	protein_coding	NM_003000.3:c.403G>T	NP_002991.2:p.Val135Leu	416	403	135	V/L	Gtg/Ttg	COSV64965095	-1	deleterious(0)
	1	17355115	17028620	C	T	0	0.06	0.06	0.72		1565	116	34	5	0	0	0.94	0.88	0.34	0.4	0.73	0.01	missense_variant	exon	4	donor	20	-	-	-	-	-	29.5	4.208	missense_variant	MODERATE	SDHB	NM_003000.3	protein_coding	NM_003000.3:c.403G>A	NP_002991.2:p.Val135Met	416	403	135	V/M	Gtg/Atg	rs201585157,COSV64965095	-1	deleterious(0)
	1	17355115	17028620	C	G	0.02	0.01	0.02	0.72		-181	-755	-20	5	0.24	0.26	0.93	0.92	0.97	0.99	0.73	0	missense_variant	exon	4	donor	20	-	-	-	-	-	27.2	3.93937	missense_variant	MODERATE	SDHB	NM_003000.3	protein_coding	NM_003000.3:c.403G>C	NP_002991.2:p.Val135Leu	416	403	135	V/L	Gtg/Ctg	COSV64965095	-1	deleterious(0)
	1	17355114	17028619	A	C	0.03	0	0.02	0.67		-180	-8	-19	6	0.24	0.28	0	0	0.97	0.99	0.73	0.06	missense_variant	exon	4	donor	19	-	-	-	-	-	29.8	4.24528	missense_variant	MODERATE	SDHB	NM_003000.3	protein_coding	NM_003000.3:c.404T>G	NP_002991.2:p.Val135Gly	417	404	135	V/G	gTg/gGg		-1	deleterious(0)
	1	17355114	17028619	A	G	0.03	0	0.03	0.54		-180	-1474	-19	6	0.24	0.27	0	0	0.97	0.99	0.73	0.19	missense_variant	exon	4	donor	19	-	-	-	-	-	29.4	4.18771	missense_variant	MODERATE	SDHB	NM_003000.3	protein_coding	NM_003000.3:c.404T>C	NP_002991.2:p.Val135Ala	417	404	135	V/A	gTg/gCg		-1	deleterious(0)
	1	17355114	17028619	A	T	0.03	0	0.02	0.64		-180	-8	-19	6	0.24	0.27	0	0	0.97	0.99	0.73	0.08	missense_variant	exon	4	donor	19	-	-	-	-	-	31	4.35533	missense_variant	MODERATE	SDHB	NM_003000.3	protein_coding	NM_003000.3:c.404T>A	NP_002991.2:p.Val135Glu	417	404	135	V/E	gTg/gAg		-1	deleterious(0)
	1	17355109	17028614	T	A	0	0.11	0.37	0.18		-3	122	40	-14	0	0	0.94	0.83	0.34	0.71	0.97	0.79	stop_gained	exon	4	donor	14	-	-	-	-	-	45	8.85831	stop_gained	HIGH	SDHB	NM_003000.3	protein_coding	NM_003000.3:c.409A>T	NP_002991.2:p.Lys137Ter	422	409	137	K/*	Aag/Tag		-1
	1	17355108	17028613	T	C	0	0.07	0.34	0.17		-1468	123	41	-13	0	0	0.94	0.87	0.34	0.68	0.97	0.8	missense_variant	exon	4	donor	13	-	-	-	-	-	25.2	3.55576	missense_variant	MODERATE	SDHB	NM_003000.3	protein_coding	NM_003000.3:c.410A>G	NP_002991.2:p.Lys137Arg	423	410	137	K/R	aAg/aGg		-1	tolerated(0.13)
	1	17355107	17028612	C	A	0	0.03	0.34	0.18		-146	124	42	-12	0	0	0.94	0.91	0.34	0.68	0.97	0.79	missense_variant	exon	4	donor	12	-	-	-	-	-	29.6	4.21896	missense_variant	MODERATE	SDHB	NM_003000.3	protein_coding	NM_003000.3:c.411G>T	NP_002991.2:p.Lys137Asn	424	411	137	K/N	aaG/aaT	COSV100973491	-1	deleterious(0)
	1	17355106	17028611	C	A	0	0.06	0.39	0.23		-175	125	43	-11	0	0	0.94	0.88	0.34	0.73	0.97	0.74	missense_variant	exon	4	donor	11	-	-	-	-	-	33	5.12883	missense_variant	MODERATE	SDHB	NM_003000.3	protein_coding	NM_003000.3:c.412G>T	NP_002991.2:p.Asp138Tyr	425	412	138	D/Y	Gat/Tat	rs786203529,CM123826,COSV64964803	-1	deleterious(0)
yes	1	17355105	17028610	T	C	0	0.11	0.42	0.28	0.42	291	126	44	-10	0	0	0.94	0.84	0.34	0.76	0.97	0.69	missense_variant	exon	4	donor	10	-	-	-	-	-	33	5.13256	missense_variant	MODERATE	SDHB	NM_003000.3	protein_coding	NM_003000.3:c.413A>G	NP_002991.2:p.Asp138Gly	426	413	138	D/G	gAt/gGt	rs1570948527	-1	deleterious(0)
	1	17355105	17028610	T	A	0	0.09	0.35	0.21		2	126	44	-10	0	0	0.94	0.85	0.34	0.69	0.97	0.76	missense_variant	exon	4	donor	10	-	-	-	-	-	33	4.89748	missense_variant	MODERATE	SDHB	NM_003000.3	protein_coding	NM_003000.3:c.413A>T	NP_002991.2:p.Asp138Val	426	413	138	D/V	gAt/gTt		-1	deleterious(0)
yes	1	17355095	17028600	G	C	0.06	0	0.03	0.52	0.52	-161	992	0	25	0.24	0.31	0.01	0.01	0.97	1	0.73	0.21	splice_region_variant,synonymous_variant	exon	4	donor	0	10.898	-2.494	8.404	1.02005343473465E-4	0.17	12.22	0.834431	splice_region_variant,synonymous_variant	LOW	SDHB	NM_003000.3	protein_coding	NM_003000.3:c.423C>G	NP_002991.2:p.Pro141%3D	436	423	141	P	ccC/ccG		-1
yes	1	17355094	17028599	C	A	0	0.11	0.5	0.97	0.97	-133	137	55	1	0	0	0.94	0.83	0.34	0.84	0.97	0	splice_donor_variant	intron	4	donor	1	-0.100	8.504	8.404	0.999990361384395	0.938	35	6.11866	splice_donor_variant	HIGH	SDHB	NM_003000.3	protein_coding	NM_003000.3:c.423+1G>T							CS056774,CS062098,COSV64965540	-1
	1	17355094	17028599	C	G	0	0.12	0.49	0.97		-133	137	55	1	0	0	0.94	0.82	0.34	0.83	0.97	0	splice_donor_variant	intron	4	donor	1	0.132	8.273	8.404	0.999990361384395	0.938	35	6.01918	splice_donor_variant	HIGH	SDHB	NM_003000.3	protein_coding	NM_003000.3:c.423+1G>C							rs398122805,CS056774,CS062098,COSV64965540	-1
	1	17355094	17028599	C	T	0	0.14	0.49	0.97		1586	137	55	1	0	0	0.94	0.8	0.34	0.83	0.97	0	splice_donor_variant	intron	4	donor	1	0.222	8.182	8.404	0.999990361384395	0.938	35	5.97933	splice_donor_variant	HIGH	SDHB	NM_003000.3	protein_coding	NM_003000.3:c.423+1G>A							rs398122805,CS056774,CS062098,COSV64965540	-1
yes	1	17355093	17028598	A	C	0	0.15	0.5	0.97	0.97	1587	138	56	2	0	0	0.94	0.79	0.34	0.85	0.97	0	splice_donor_variant	intron	4	donor	2	0.757	7.647	8.404	0.999988247793601	0.932	35	6.09305	splice_donor_variant	HIGH	SDHB	NM_003000.3	protein_coding	NM_003000.3:c.423+2T>G								-1
	1	17355093	17028598	A	T	0	0.18	0.49	0.97		1587	138	56	2	0	0	0.94	0.76	0.34	0.84	0.97	0	splice_donor_variant	intron	4	donor	2	0.221	8.183	8.404	0.999988247793601	0.932	35	6.00478	splice_donor_variant	HIGH	SDHB	NM_003000.3	protein_coding	NM_003000.3:c.423+2T>A								-1
	1	17355093	17028598	A	G	0	0.17	0.49	0.97		1587	138	56	2	0	0	0.94	0.77	0.34	0.83	0.97	0	splice_donor_variant	intron	4	donor	2	0.650	7.754	8.404	0.999945827492243	0.868	34	5.69158	splice_donor_variant	HIGH	SDHB	NM_003000.3	protein_coding	NM_003000.3:c.423+2T>C								-1
yes	1	17355092	17028597	C	A	0	0.14	0.5	0.87	0.87	-131	139	57	3	0	0	0.94	0.8	0.34	0.85	0.97	0.1	splice_donor_region_variant,intron_variant	intron	4	donor	3	-2.602	11.006	8.404	0.999605559482793	0.884	24.5	3.33609	splice_donor_region_variant,intron_variant	LOW	SDHB	NM_003000.3	protein_coding	NM_003000.3:c.423+3G>T								-1
	1	17355092	17028597	C	G	0	0.14	0.48	0.92		1588	139	57	3	0	0	0.94	0.8	0.34	0.83	0.97	0.05	splice_donor_region_variant,intron_variant	intron	4	donor	3	2.842	5.562	8.404	0.999132987604733	0.872	25	3.49731	splice_donor_region_variant,intron_variant	LOW	SDHB	NM_003000.3	protein_coding	NM_003000.3:c.423+3G>C								-1
yes	1	17355091	17028596	T	A	0	0.09	0.54	0.96	0.96	-130	140	58	4	0	0	0.94	0.85	0.34	0.88	0.97	0.01	splice_donor_region_variant,intron_variant	intron	4	donor	4	2.233	6.171	8.404	0.999961811156653	0.94	28.9	4.13591	splice_donor_region_variant,intron_variant	LOW	SDHB	NM_003000.3	protein_coding	NM_003000.3:c.423+4A>T								-1
	1	17355091	17028596	T	C	0	0.13	0.51	0.84		-130	140	58	4	0	0	0.94	0.81	0.34	0.86	0.97	0.12	splice_donor_region_variant,intron_variant	intron	4	donor	4	2.632	5.773	8.404	0.999930182293293	0.948	26.4	3.82145	splice_donor_region_variant,intron_variant	LOW	SDHB	NM_003000.3	protein_coding	NM_003000.3:c.423+4A>G								-1
	1	17355091	17028596	T	G	0	0.13	0.51	0.69		1589	140	58	4	0	0	0.94	0.81	0.34	0.85	0.97	0.27	splice_donor_region_variant,intron_variant	intron	4	donor	4	6.274	2.130	8.404	0.999792046611609	0.936	24.9	3.46585	splice_donor_region_variant,intron_variant	LOW	SDHB	NM_003000.3	protein_coding	NM_003000.3:c.423+4A>C								-1
yes	1	17355090	17028595	C	G	0	0.12	0.52	0.97	0.97	-129	141	59	5	0	0	0.94	0.82	0.34	0.86	0.97	0	splice_donor_5th_base_variant,intron_variant	intron	4	donor	5	0.017	8.388	8.404	0.999991796376611	0.982	31	4.33277	splice_donor_5th_base_variant,intron_variant	LOW	SDHB	NM_003000.3	protein_coding	NM_003000.3:c.423+5G>C								-1
	1	17355090	17028595	C	T	0	0.11	0.52	0.97		-129	141	59	5	0	0	0.94	0.83	0.34	0.86	0.97	0	splice_donor_5th_base_variant,intron_variant	intron	4	donor	5	-5.781	14.185	8.404	0.999991796376611	0.992	31	4.28797	splice_donor_5th_base_variant,intron_variant	LOW	SDHB	NM_003000.3	protein_coding	NM_003000.3:c.423+5G>A								-1
	1	17355090	17028595	C	A	0	0.11	0.52	0.97		-129	141	59	5	0	0	0.94	0.83	0.34	0.86	0.97	0	splice_donor_5th_base_variant,intron_variant	intron	4	donor	5	-2.160	10.564	8.404	0.999991796376611	0.978	31	4.34451	splice_donor_5th_base_variant,intron_variant	LOW	SDHB	NM_003000.3	protein_coding	NM_003000.3:c.423+5G>T								-1
yes	1	17355089	17028594	A	C	0	0.17	0.46	0.89	0.89	1591	142	60	6	0	0	0.94	0.77	0.34	0.81	0.97	0.07	splice_donor_region_variant,intron_variant	intron	4	donor	6	3.943	4.461	8.404	0.999733548216301	0.914	25.7	3.68685	splice_donor_region_variant,intron_variant	LOW	SDHB	NM_003000.3	protein_coding	NM_003000.3:c.423+6T>G								-1
	1	17355089	17028594	A	G	0	0.17	0.44	0.63		1591	142	60	6	0	0	0.94	0.77	0.34	0.78	0.97	0.34	splice_donor_region_variant,intron_variant	intron	4	donor	6	3.589	4.816	8.404	0.999731376924074	0.984	24.6	3.36844	splice_donor_region_variant,intron_variant	LOW	SDHB	NM_003000.3	protein_coding	NM_003000.3:c.423+6T>C								-1
	1	17355089	17028594	A	T	0	0.17	0.45	0.8		1591	142	60	6	0	0	0.94	0.77	0.34	0.8	0.97	0.17	splice_donor_region_variant,intron_variant	intron	4	donor	6	3.612	4.792	8.404	0.999750595897332	0.854	25.4	3.62437	splice_donor_region_variant,intron_variant	LOW	SDHB	NM_003000.3	protein_coding	NM_003000.3:c.423+6T>A								-1
	1	17355088	17028593	A	T	0.07	0	0.03	0.48		-154	999	7	32	0.24	0.31	0.01	0.01	0.97	1	0.73	0.25	splice_region_variant,intron_variant	intron	4	donor	7	-	-	-	5.82116734680235E-4	0.036	10.15	0.581633	splice_region_variant,intron_variant	LOW	SDHB	NM_003000.3	protein_coding	NM_003000.3:c.423+7T>A								-1
	1	17354963	17028468	T	A	0.39	0.01	0.39	0.05		-29	-603	-156	157	0.24	0.63	0.93	0.92	0.16	0.55	0.73	0.68	intron_variant	intron	4	donor	132	-	-	-	-	-	1.684	-0.072324	intron_variant	MODIFIER	SDHB	NM_003000.3	protein_coding	NM_003000.3:c.423+132A>T								-1
	1	17354962	17028467	C	T	0.25	0.01	0.27	0.02		-28	-602	-155	158	0.24	0.49	0.93	0.92	0.16	0.44	0.73	0.7	intron_variant	intron	4	donor	133	-	-	-	-	-	4.982	0.144127	intron_variant	MODIFIER	SDHB	NM_003000.3	protein_coding	NM_003000.3:c.423+133G>A								-1
	1	17354958	17028463	C	A	0.29	0.01	0.34	0.02		-24	-598	-151	162	0.24	0.53	0.93	0.92	0.16	0.5	0.73	0.71	intron_variant	intron	4	donor	137	-	-	-	-	-	4.748	0.129595	intron_variant	MODIFIER	SDHB	NM_003000.3	protein_coding	NM_003000.3:c.423+137G>T								-1
	1	17354946	17028451	T	A	0.32	0.01	0.31	0.03		-12	-586	-139	174	0.24	0.57	0.93	0.92	0.16	0.47	0.73	0.7	intron_variant	intron	4	donor	149	-	-	-	-	-	6.037	0.213353	intron_variant	MODIFIER	SDHB	NM_003000.3	protein_coding	NM_003000.3:c.423+149A>T								-1
	1	17354944	17028449	T	G	0.27	0.01	0.27	0.02		-10	-584	-137	176	0.24	0.51	0.93	0.92	0.16	0.43	0.73	0.7	intron_variant	intron	4	donor	151	-	-	-	-	-	1.286	-0.113422	intron_variant	MODIFIER	SDHB	NM_003000.3	protein_coding	NM_003000.3:c.423+151A>C								-1
	1	17354944	17028449	T	A	0.33	0.01	0.35	0.03		-10	-584	-137	176	0.24	0.58	0.93	0.92	0.16	0.51	0.73	0.69	intron_variant	intron	4	donor	151	-	-	-	-	-	1.799	-0.061988	intron_variant	MODIFIER	SDHB	NM_003000.3	protein_coding	NM_003000.3:c.423+151A>T								-1
	1	17354941	17028446	T	A	0.41	0.01	0.41	0.06		-7	-581	-134	179	0.24	0.65	0.93	0.92	0.16	0.57	0.73	0.67	intron_variant	intron	4	donor	154	-	-	-	-	-	8.596	0.418613	intron_variant	MODIFIER	SDHB	NM_003000.3	protein_coding	NM_003000.3:c.423+154A>T								-1
yes	1	17354939	17028444	C	A	0.55	0.01	0.56	0.07	0.56	-5	-579	-132	181	0.24	0.79	0.93	0.92	0.16	0.72	0.73	0.66	intron_variant	intron	4	donor	156	-	-	-	-	-	8.479	0.407509	intron_variant	MODIFIER	SDHB	NM_003000.3	protein_coding	NM_003000.3:c.423+156G>T								-1
	1	17354939	17028444	C	G	0.29	0.01	0.25	0.02		-5	-579	-132	181	0.24	0.53	0.93	0.92	0.16	0.41	0.73	0.7	intron_variant	intron	4	donor	156	-	-	-	-	-	5.977	0.209273	intron_variant	MODIFIER	SDHB	NM_003000.3	protein_coding	NM_003000.3:c.423+156G>C								-1
	1	17354914	17028419	A	G	0.28	0.01	0.26	0.03		20	-554	-107	206	0.24	0.52	0.93	0.92	0.16	0.42	0.73	0.7	intron_variant	intron	4	donor	181	-	-	-	-	-	9.271	0.486093	intron_variant	MODIFIER	SDHB	NM_003000.3	protein_coding	NM_003000.3:c.423+181T>C								-1
	1	17354906	17028411	A	C	0.27	0.01	0.21	0.03		28	-546	-99	214	0.24	0.51	0.93	0.92	0.16	0.37	0.73	0.69	intron_variant	intron	4	donor	189	-	-	-	-	-	9.967	0.561817	intron_variant	MODIFIER	SDHB	NM_003000.3	protein_coding	NM_003000.3:c.423+189T>G								-1
yes	1	17354905	17028410	T	G	0.47	0.02	0.51	0.06	0.51	29	-545	-98	215	0.24	0.72	0.93	0.91	0.16	0.67	0.73	0.67	intron_variant	intron	4	donor	190	-	-	-	-	-	11.13	0.697861	intron_variant	MODIFIER	SDHB	NM_003000.3	protein_coding	NM_003000.3:c.423+190A>C								-1
	1	17354905	17028410	T	C	0.24	0.01	0.26	0.03		29	-545	-98	215	0.24	0.48	0.93	0.92	0.16	0.42	0.73	0.7	intron_variant	intron	4	donor	190	-	-	-	-	-	9.918	0.556244	intron_variant	MODIFIER	SDHB	NM_003000.3	protein_coding	NM_003000.3:c.423+190A>G								-1
	1	17354905	17028410	T	A	0.38	0.01	0.42	0.04		29	-545	-98	215	0.24	0.62	0.93	0.92	0.16	0.58	0.73	0.68	intron_variant	intron	4	donor	190	-	-	-	-	-	10.66	0.641015	intron_variant	MODIFIER	SDHB	NM_003000.3	protein_coding	NM_003000.3:c.423+190A>T								-1
	1	17354904	17028409	C	T	0.27	0.01	0.27	0.03		30	-544	-97	216	0.24	0.51	0.93	0.92	0.16	0.43	0.73	0.7	intron_variant	intron	4	donor	191	-	-	-	-	-	11.42	0.732748	intron_variant	MODIFIER	SDHB	NM_003000.3	protein_coding	NM_003000.3:c.423+191G>A							rs1207423265	-1
	1	17354904	17028409	C	G	0.38	0.01	0.4	0.04		30	-544	-97	216	0.24	0.63	0.93	0.92	0.16	0.56	0.73	0.69	intron_variant	intron	4	donor	191	-	-	-	-	-	11.58	0.753433	intron_variant	MODIFIER	SDHB	NM_003000.3	protein_coding	NM_003000.3:c.423+191G>C								-1
	1	17354886	17028391	T	G	0.3	0.01	0.23	0.03		48	-526	-79	234	0.24	0.55	0.93	0.92	0.16	0.4	0.73	0.7	intron_variant	intron	4	donor	209	-	-	-	-	-	13.67	1.0354	intron_variant	MODIFIER	SDHB	NM_003000.3	protein_coding	NM_003000.3:c.423+209A>C								-1
	1	17354862	17028367	T	C	0.37	0.01	0.35	0.04		72	-502	-55	258	0.24	0.62	0.93	0.92	0.16	0.52	0.73	0.69	intron_variant	intron	4	donor	233	-	-	-	-	-	12.77	0.906763	intron_variant	MODIFIER	SDHB	NM_003000.3	protein_coding	NM_003000.3:c.423+233A>G								-1
	1	17354850	17028355	A	G	0.29	0.01	0.27	0.03		84	-490	-43	270	0.24	0.53	0.93	0.92	0.16	0.43	0.73	0.7	intron_variant	intron	4	donor	245	-	-	-	-	-	14.44	1.16312	intron_variant	MODIFIER	SDHB	NM_003000.3	protein_coding	NM_003000.3:c.423+245T>C								-1
	1	17354847	17028352	G	T	0.27	0.01	0.23	0.03		87	-487	-40	273	0.24	0.51	0.93	0.92	0.16	0.39	0.73	0.7	intron_variant	intron	4	donor	248	-	-	-	-	-	10.97	0.678658	intron_variant	MODIFIER	SDHB	NM_003000.3	protein_coding	NM_003000.3:c.423+248C>A								-1
	1	17354839	17028344	T	G	0.28	0.01	0.26	0.03		95	-479	-32	281	0.24	0.52	0.93	0.92	0.16	0.42	0.73	0.7	intron_variant	intron	4	donor	256	-	-	-	-	-	13.25	0.974505	intron_variant	MODIFIER	SDHB	NM_003000.3	protein_coding	NM_003000.3:c.423+256A>C								-1
	1	17354832	17028337	A	C	0.42	0.01	0.4	0.03		102	-472	-25	288	0.24	0.66	0.93	0.92	0.16	0.56	0.73	0.69	intron_variant	intron	4	donor	263	-	-	-	-	-	13.86	1.0664	intron_variant	MODIFIER	SDHB	NM_003000.3	protein_coding	NM_003000.3:c.423+263T>G								-1
	1	17354832	17028337	A	T	0.37	0.01	0.35	0.03		102	-472	-25	288	0.24	0.61	0.93	0.92	0.16	0.51	0.73	0.7	intron_variant	intron	4	donor	263	-	-	-	-	-	13.66	1.03394	intron_variant	MODIFIER	SDHB	NM_003000.3	protein_coding	NM_003000.3:c.423+263T>A								-1
	1	17354831	17028336	T	G	0.28	0.01	0.25	0.02		103	-471	-24	289	0.24	0.52	0.93	0.92	0.16	0.41	0.73	0.7	intron_variant	intron	4	donor	264	-	-	-	-	-	13.67	1.03588	intron_variant	MODIFIER	SDHB	NM_003000.3	protein_coding	NM_003000.3:c.423+264A>C								-1
	1	17354831	17028336	T	C	0.28	0.01	0.24	0.02		103	-471	-24	289	0.24	0.52	0.93	0.92	0.16	0.4	0.73	0.7	intron_variant	intron	4	donor	264	-	-	-	-	-	13.78	1.05239	intron_variant	MODIFIER	SDHB	NM_003000.3	protein_coding	NM_003000.3:c.423+264A>G								-1
	1	17354827	17028332	T	C	0.32	0.01	0.33	0.03		107	-467	-20	293	0.24	0.56	0.93	0.92	0.16	0.5	0.73	0.69	intron_variant	intron	4	donor	268	-	-	-	-	-	15.51	1.36083	intron_variant	MODIFIER	SDHB	NM_003000.3	protein_coding	NM_003000.3:c.423+268A>G								-1
	1	17354808	17028313	A	T	0.2	0	0.35	0.05		126	-448	-1	-6	0.24	0.44	0.93	0.93	0.16	0.52	0.06	0.01	intron_variant	intron	4	donor	287	-	-	-	-	-	15.03	1.27057	intron_variant	MODIFIER	SDHB	NM_003000.3	protein_coding	NM_003000.3:c.423+287T>A								-1
	1	17354804	17028309	C	T	0.36	0.01	0.46	0.03		130	-444	3	316	0.24	0.6	0.93	0.92	0.16	0.62	0.73	0.7	intron_variant	intron	4	donor	291	-	-	-	-	-	11.76	0.775088	intron_variant	MODIFIER	SDHB	NM_003000.3	protein_coding	NM_003000.3:c.423+291G>A							rs1465948646	-1
yes	1	17354801	17028306	C	A	0.63	0	0.67	0.06	0.67	133	1	6	1	0.24	0.87	0	0	0.16	0.83	0.06	0	intron_variant	intron	4	donor	294	-	-	-	-	-	13.65	1.03257	intron_variant	MODIFIER	SDHB	NM_003000.3	protein_coding	NM_003000.3:c.423+294G>T								-1
	1	17354801	17028306	C	G	0.2	0.01	0.32	0.06		133	-441	6	1	0.24	0.44	0.93	0.92	0.16	0.49	0.06	0	intron_variant	intron	4	donor	294	-	-	-	-	-	11.52	0.745555	intron_variant	MODIFIER	SDHB	NM_003000.3	protein_coding	NM_003000.3:c.423+294G>C								-1
yes	1	17354799	17028304	A	T	0.43	0.01	0.52	0.04	0.52	135	-439	3	8	0.24	0.67	0.93	0.92	0.06	0.58	0.16	0.12	intron_variant	intron	4	donor	296	-	-	-	-	-	13.11	0.954516	intron_variant	MODIFIER	SDHB	NM_003000.3	protein_coding	NM_003000.3:c.423+296T>A								-1
	1	17354795	17028300	A	T	0.19	0.01	0.26	0.02		139	-435	7	325	0.24	0.44	0.93	0.92	0.06	0.32	0.73	0.71	intron_variant	intron	4	donor	300	-	-	-	-	-	12.8	0.911548	intron_variant	MODIFIER	SDHB	NM_003000.3	protein_coding	NM_003000.3:c.423+300T>A								-1
	1	17354649	17028154	A	C	0.27	0.02	0.08	0.05		-1	285	-73	158	0	0.27	0.24	0.22	0	0.08	0.16	0.11	intron_variant	intron	4	acceptor	289	-	-	-	-	-	6.098	0.217592	intron_variant	MODIFIER	SDHB	NM_003000.3	protein_coding	NM_003000.3:c.424-289T>G								-1
yes	1	17354511	17028016	A	C	0.77	0.12	0.6	0.05	0.77	-1	-151	-76	-256	0	0.77	0.93	0.81	0	0.6	0.47	0.42	intron_variant	intron	4	acceptor	151	-	-	-	-	-	4.434	0.110376	intron_variant	MODIFIER	SDHB	NM_003000.3	protein_coding	NM_003000.3:c.424-151T>G								-1
	1	17354509	17028014	A	C	0.34	0.05	0.17	0.02		-1	-149	-74	-265	0	0.34	0.93	0.88	0	0.18	0.31	0.29	intron_variant	intron	4	acceptor	149	-	-	-	-	-	1.623	-0.078074	intron_variant	MODIFIER	SDHB	NM_003000.3	protein_coding	NM_003000.3:c.424-149T>G								-1
	1	17354430	17027935	T	C	0.35	0.02	0.3	0.03		65	504	5	-344	0.01	0.36	0.24	0.22	0	0.3	0.3	0.28	intron_variant	intron	4	acceptor	70	-	-	-	-	-	4.636	0.122699	intron_variant	MODIFIER	SDHB	NM_003000.3	protein_coding	NM_003000.3:c.424-70A>G								-1
	1	17354405	17027910	A	C	0.09	0.36	0	0.18		90	-45	15	-319	0.01	0.1	0.93	0.57	0	0	0.3	0.12	intron_variant	intron	4	acceptor	45	-	-	-	-	-	11.27	0.715307	intron_variant	MODIFIER	SDHB	NM_003000.3	protein_coding	NM_003000.3:c.424-45T>G								-1
	1	17354405	17027910	A	G	0.05	0.27	0	0.15		90	-45	30	-319	0.01	0.06	0.93	0.66	0	0	0.3	0.15	intron_variant	intron	4	acceptor	45	-	-	-	-	-	11.46	0.737851	intron_variant	MODIFIER	SDHB	NM_003000.3	protein_coding	NM_003000.3:c.424-45T>C								-1
	1	17354405	17027910	A	T	0.02	0.26	0	0.13		90	-45	-45	-319	0.01	0.03	0.93	0.67	0	0	0.3	0.17	intron_variant	intron	4	acceptor	45	-	-	-	-	-	11.33	0.722335	intron_variant	MODIFIER	SDHB	NM_003000.3	protein_coding	NM_003000.3:c.424-45T>A							rs1011842706	-1
	1	17354403	17027908	T	C	0.02	0.35	0	0.17		92	-43	32	-317	0.01	0.03	0.93	0.58	0	0	0.3	0.14	intron_variant	intron	4	acceptor	43	-	-	-	-	-	7.569	0.327998	intron_variant	MODIFIER	SDHB	NM_003000.3	protein_coding	NM_003000.3:c.424-43A>G							rs751173676	-1
	1	17354403	17027908	T	G	0.03	0.33	0	0.16		92	-43	32	-317	0.01	0.05	0.93	0.6	0	0	0.3	0.14	intron_variant	intron	4	acceptor	43	-	-	-	-	-	7.257	0.303586	intron_variant	MODIFIER	SDHB	NM_003000.3	protein_coding	NM_003000.3:c.424-43A>C								-1
	1	17354367	17027872	T	C	0.94	0.81	0	0.03		-1	-7	-112	-123	0	0.94	0.93	0.12	0.47	0.47	0.31	0.28	splice_region_variant,splice_polypyrimidine_tract_variant,intron_variant	intron	4	acceptor	7	3.674	5.542	9.216	0.96348954937969	0.978	23.1	2.77473	splice_polypyrimidine_tract_variant,splice_region_variant,intron_variant	LOW	SDHB	NM_003000.3	protein_coding	NM_003000.3:c.424-7A>G								-1
	1	17354366	17027871	G	C	0.61	0.38	0	0.12		-1	-6	-1	-280	0	0.61	0.93	0.55	0	0	0.3	0.18	splice_region_variant,splice_polypyrimidine_tract_variant,intron_variant	intron	4	acceptor	6	2.103	7.113	9.216	0.999786846727573	0.902	18.24	1.80566	splice_polypyrimidine_tract_variant,splice_region_variant,intron_variant	LOW	SDHB	NM_003000.3	protein_coding	NM_003000.3:c.424-6C>G								-1
	1	17354363	17027868	G	C	0.53	0.92	0	0.13		-1	-3	-1	-108	0	0.53	0.93	0.01	0	0	0.47	0.33	splice_region_variant,splice_polypyrimidine_tract_variant,intron_variant	intron	4	acceptor	3	2.005	7.211	9.216	0.999056021768651	0.68	24.9	3.47602	splice_polypyrimidine_tract_variant,splice_region_variant,intron_variant	LOW	SDHB	NM_003000.3	protein_coding	NM_003000.3:c.424-3C>G							rs1557741166,CS044767	-1
	1	17354363	17027868	G	T	0.02	0.32	0	0.22		132	-3	57	-108	0.01	0.03	0.93	0.61	0	0	0.47	0.24	splice_region_variant,splice_polypyrimidine_tract_variant,intron_variant	intron	4	acceptor	3	6.144	3.071	9.216	0.670976732404581	0.71	20.2	2.04279	splice_polypyrimidine_tract_variant,splice_region_variant,intron_variant	LOW	SDHB	NM_003000.3	protein_coding	NM_003000.3:c.424-3C>A							CS044767	-1
	1	17354362	17027867	T	C	0.04	0.93	0	0.37		133	-2	58	-107	0.01	0.05	0.93	0	0	0	0.47	0.09	splice_acceptor_variant	intron	4	acceptor	2	1.261	7.955	9.216	0.999988247793601	0.93	33	5.41242	splice_acceptor_variant	HIGH	SDHB	NM_003000.3	protein_coding	NM_003000.3:c.424-2A>G								-1
	1	17354362	17027867	T	A	0.04	0.93	0	0.37		133	-2	58	-107	0.01	0.05	0.93	0	0	0	0.47	0.09	splice_acceptor_variant	intron	4	acceptor	2	0.849	8.367	9.216	0.999988247793601	0.932	33	5.3433	splice_acceptor_variant	HIGH	SDHB	NM_003000.3	protein_coding	NM_003000.3:c.424-2A>T								-1
	1	17354362	17027867	T	G	0.04	0.93	0	0.32		133	-2	58	-107	0.01	0.06	0.93	0	0	0	0.47	0.15	splice_acceptor_variant	intron	4	acceptor	2	1.173	8.042	9.216	0.999988247793601	0.93	33	5.28287	splice_acceptor_variant	HIGH	SDHB	NM_003000.3	protein_coding	NM_003000.3:c.424-2A>C								-1
	1	17354361	17027866	C	G	0.04	0.93	0	0.41		134	-1	59	-106	0.01	0.05	0.93	0	0	0	0.47	0.06	splice_acceptor_variant	intron	4	acceptor	1	1.151	8.064	9.216	0.999986675681007	0.936	34	5.53456	splice_acceptor_variant	HIGH	SDHB	NM_003000.3	protein_coding	NM_003000.3:c.424-1G>C							CS030565	-1
	1	17354361	17027866	C	A	0.04	0.93	0	0.43		134	-1	59	-106	0.01	0.05	0.93	0	0	0	0.47	0.04	splice_acceptor_variant	intron	4	acceptor	1	0.617	8.598	9.216	0.999986675681007	0.936	34	5.61132	splice_acceptor_variant	HIGH	SDHB	NM_003000.3	protein_coding	NM_003000.3:c.424-1G>T							CS030565	-1
	1	17354361	17027866	C	T	0.52	0.93	0	0.3		-2	-1	59	-106	0	0.52	0.93	0	0	0	0.47	0.17	splice_acceptor_variant	intron	4	acceptor	1	0.465	8.750	9.216	0.999986675681007	0.936	35	5.98113	splice_acceptor_variant	HIGH	SDHB	NM_003000.3	protein_coding	NM_003000.3:c.424-1G>A							rs1131691060,CS030565	-1
	1	17354360	17027865	C	A	0.01	0.29	0	0.26		135	0	60	-105	0.01	0.02	0.93	0.64	0	0	0.47	0.21	missense_variant,splice_region_variant	exon	5	acceptor	0	6.717	2.499	9.216	0.999891403981092	1.0	34	5.89963	missense_variant,splice_region_variant	MODERATE	SDHB	NM_003000.3	protein_coding	NM_003000.3:c.424G>T	NP_002991.2:p.Asp142Tyr	437	424	142	D/Y	Gat/Tat		-1	deleterious(0)
	1	17354324	17027829	C	A	0	0.38	0	0.27		171	36	36	-69	0.01	0.01	0.93	0.55	0	0	0.47	0.2	stop_gained	exon	5	acceptor	36	-	-	-	-	-	37	7.06886	stop_gained	HIGH	SDHB	NM_003000.3	protein_coding	NM_003000.3:c.460G>T	NP_002991.2:p.Glu154Ter	473	460	154	E/*	Gag/Tag		-1
	1	17354312	17027817	T	A	0	0.5	0	0.34		183	48	108	-57	0.01	0.01	0.93	0.43	0	0	0.47	0.13	stop_gained	exon	5	acceptor	48	-	-	-	-	-	45	8.7226	stop_gained	HIGH	SDHB	NM_003000.3	protein_coding	NM_003000.3:c.472A>T	NP_002991.2:p.Lys158Ter	485	472	158	K/*	Aag/Tag	CM123795	-1
	1	17354310	17027815	C	A	0	0.26	0	0.22		-142	50	28	-55	0	0	0.93	0.67	0	0	0.47	0.25	missense_variant	exon	5	acceptor	50	-	-	-	-	-	32	4.77163	missense_variant	MODERATE	SDHB	NM_003000.3	protein_coding	NM_003000.3:c.474G>T	NP_002991.2:p.Lys158Asn	487	474	158	K/N	aaG/aaT		-1	deleterious(0)
	1	17354309	17027814	T	A	0	0.42	0	0.28		-114	51	111	-54	0	0	0.93	0.52	0	0	0.47	0.19	stop_gained	exon	5	acceptor	51	-	-	-	-	-	38	7.40629	stop_gained	HIGH	SDHB	NM_003000.3	protein_coding	NM_003000.3:c.475A>T	NP_002991.2:p.Lys159Ter	488	475	159	K/*	Aag/Tag		-1
	1	17354306	17027811	T	A	0	0.4	0	0.29		-97	54	2	-51	0	0	0.93	0.53	0	0	0.47	0.18	stop_gained	exon	5	acceptor	54	-	-	-	-	-	41	8.10006	stop_gained	HIGH	SDHB	NM_003000.3	protein_coding	NM_003000.3:c.478A>T	NP_002991.2:p.Lys160Ter	491	478	160	K/*	Aag/Tag	COSV100973404	-1
	1	17354300	17027805	C	A	0	0.33	0	0.29		195	60	120	-45	0.01	0.01	0.93	0.6	0	0	0.47	0.18	stop_gained	exon	5	donor	56	-	-	-	-	-	38	7.56413	stop_gained	HIGH	SDHB	NM_003000.3	protein_coding	NM_003000.3:c.484G>T	NP_002991.2:p.Glu162Ter	497	484	162	E/*	Gaa/Taa		-1
	1	17354291	17027796	C	G	0.01	0	0.26	0.07		643	69	-3	-36	0.24	0.25	0.93	0.93	0.1	0.36	0.47	0.4	missense_variant	exon	5	donor	47	-	-	-	-	-	17.35	1.68017	missense_variant	MODERATE	SDHB	NM_003000.3	protein_coding	NM_003000.3:c.493G>C	NP_002991.2:p.Glu165Gln	506	493	165	E/Q	Gaa/Caa	CD094763	-1	tolerated(0.4)
	1	17354291	17027796	C	A	0	0.18	0.28	0.3		-123	69	2	-36	0	0	0.93	0.75	0	0.28	0.47	0.16	stop_gained	exon	5	donor	47	-	-	-	-	-	36	6.9483	stop_gained	HIGH	SDHB	NM_003000.3	protein_coding	NM_003000.3:c.493G>T	NP_002991.2:p.Glu165Ter	506	493	165	E/*	Gaa/Taa	CD094763	-1
	1	17354291	17027796	C	T	0	0.01	0.31	0.1		643	69	-3	-36	0.24	0.24	0.93	0.92	0.1	0.42	0.47	0.36	missense_variant	exon	5	donor	47	-	-	-	-	-	20.7	2.11265	missense_variant	MODERATE	SDHB	NM_003000.3	protein_coding	NM_003000.3:c.493G>A	NP_002991.2:p.Glu165Lys	506	493	165	E/K	Gaa/Aaa	CD094763	-1	tolerated(0.43)
	1	17354290	17027795	T	A	0.07	0	1	0.46		644	1797	2	-35	0.24	0.31	0.01	0.01	0	1	0.47	0	missense_variant	exon	5	donor	46	-	-	-	-	-	19.99	2.03166	missense_variant	MODERATE	SDHB	NM_003000.3	protein_coding	NM_003000.3:c.494A>T	NP_002991.2:p.Glu165Val	507	494	165	E/V	gAa/gTa		-1	tolerated(0.15)
	1	17354286	17027791	G	A	0.06	0	0.89	0.47		74	-862	2	-31	0.93	0.99	0	0	0.1	1	0.47	0	synonymous_variant	exon	5	donor	42	-	-	-	-	-	16.79	1.58923	synonymous_variant	LOW	SDHB	NM_003000.3	protein_coding	NM_003000.3:c.498C>T	NP_002991.2:p.Gly166%3D	511	498	166	G	ggC/ggT		-1
	1	17354282	17027787	G	A	0.07	0	0.8	0.4		652	1805	6	-27	0.24	0.31	0.01	0.01	0.1	0.9	0.47	0.07	stop_gained	exon	5	donor	38	-	-	-	-	-	39	7.84191	stop_gained	HIGH	SDHB	NM_003000.3	protein_coding	NM_003000.3:c.502C>T	NP_002991.2:p.Gln168Ter	515	502	168	Q/*	Cag/Tag	rs1553177677,CM103708	-1
	1	17354273	17027778	G	C	0	0.04	0.29	0.18		-595	87	5	-18	0	0	0.93	0.9	0	0.29	0.47	0.28	missense_variant	exon	5	donor	29	-	-	-	-	-	23.2	2.80879	missense_variant	MODERATE	SDHB	NM_003000.3	protein_coding	NM_003000.3:c.511C>G	NP_002991.2:p.Leu171Val	524	511	171	L/V	Ctg/Gtg		-1	deleterious(0.02)
	1	17354270	17027775	G	A	0	0.28	0.05	0.37		18	90	18	-15	0	0	0.93	0.65	0.1	0.15	0.47	0.1	stop_gained	exon	5	donor	26	-	-	-	-	-	42	8.2525	stop_gained	HIGH	SDHB	NM_003000.3	protein_coding	NM_003000.3:c.514C>T	NP_002991.2:p.Gln172Ter	527	514	172	Q/*	Cag/Tag		-1
	1	17354262	17027767	T	G	0.04	0	0.29	0.04		672	-838	-7	26	0.24	0.29	0	0	0.47	0.75	0.1	0.06	synonymous_variant	exon	5	donor	18	-	-	-	-	-	13.57	1.02149	synonymous_variant	LOW	SDHB	NM_003000.3	protein_coding	NM_003000.3:c.522A>C	NP_002991.2:p.Ile174%3D	535	522	174	I	atA/atC		-1
	1	17354259	17027764	T	C	0	0.03	0	0.26		-619	101	-30	-4	0	0	0.93	0.9	0.01	0.01	0.47	0.2	synonymous_variant	exon	5	donor	15	-	-	-	-	-	11.66	0.762745	synonymous_variant	LOW	SDHB	NM_003000.3	protein_coding	NM_003000.3:c.525A>G	NP_002991.2:p.Glu175%3D	538	525	175	E	gaA/gaG		-1
	1	17354258	17027763	C	A	0	0.32	0.11	0.27		-3	102	30	-14	0	0	0.93	0.61	0.1	0.21	0.31	0.04	stop_gained	exon	5	donor	14	-	-	-	-	-	46	8.97188	stop_gained	HIGH	SDHB	NM_003000.3	protein_coding	NM_003000.3:c.526G>T	NP_002991.2:p.Glu176Ter	539	526	176	E/*	Gag/Tag	rs794728946,CM100064	-1
	1	17354258	17027763	C	T	0	0.02	0.38	0.2		-580	973	-3	-172	0	0	0.94	0.92	0.47	0.85	0.3	0.1	missense_variant	exon	5	donor	14	-	-	-	-	-	31	4.3074	missense_variant	MODERATE	SDHB	NM_003000.3	protein_coding	NM_003000.3:c.526G>A	NP_002991.2:p.Glu176Lys	539	526	176	E/K	Gag/Aag	CM100064	-1	deleterious(0)
	1	17354257	17027762	T	C	0	0.13	0.08	0.35		-838	103	31	-2	0	0	0.93	0.8	0.1	0.18	0.47	0.12	missense_variant	exon	5	donor	13	-	-	-	-	-	26.4	3.82423	missense_variant	MODERATE	SDHB	NM_003000.3	protein_coding	NM_003000.3:c.527A>G	NP_002991.2:p.Glu176Gly	540	527	176	E/G	gAg/gGg	rs201082445,COSV104685780	-1	deleterious(0)
	1	17354257	17027762	T	A	0.03	0.02	0.8	0.41		677	103	2	-2	0.24	0.28	0.93	0.91	0	0.8	0.47	0.05	missense_variant	exon	5	donor	13	-	-	-	-	-	29.6	4.21164	missense_variant	MODERATE	SDHB	NM_003000.3	protein_coding	NM_003000.3:c.527A>T	NP_002991.2:p.Glu176Val	540	527	176	E/V	gAg/gTg	COSV104685780	-1	deleterious(0)
	1	17354256	17027761	C	T	0.04	0	0.38	0.03		104	-832	-1	32	0.93	0.97	0	0	0.47	0.84	0.1	0.07	synonymous_variant	exon	5	donor	12	-	-	-	-	-	8.585	0.417562	synonymous_variant	LOW	SDHB	NM_003000.3	protein_coding	NM_003000.3:c.528G>A	NP_002991.2:p.Glu176%3D	541	528	176	E	gaG/gaA		-1
	1	17354255	17027760	G	A	0	0	0.29	0.12		976	105	0	-11	0.94	0.95	0.93	0.93	0.47	0.76	0.31	0.19	missense_variant	exon	5	donor	11	-	-	-	-	-	32	4.63703	missense_variant	MODERATE	SDHB	NM_003000.3	protein_coding	NM_003000.3:c.529C>T	NP_002991.2:p.Arg177Cys	542	529	177	R/C	Cgt/Tgt	rs149091125,CM134047	-1	deleterious(0)
	1	17354255	17027760	G	C	0.06	0	0.53	0.3		105	-831	0	-11	0.93	1	0	0	0.47	0.99	0.31	0.01	missense_variant	exon	5	donor	11	-	-	-	-	-	32	4.59495	missense_variant	MODERATE	SDHB	NM_003000.3	protein_coding	NM_003000.3:c.529C>G	NP_002991.2:p.Arg177Gly	542	529	177	R/G	Cgt/Ggt	CM134047	-1	deleterious(0)
	1	17354254	17027759	C	A	0	0.02	0.01	0.47		-591	106	-659	1	0	0	0.93	0.91	0.17	0.18	0.47	0	missense_variant	exon	5	donor	10	-	-	-	-	-	29.7	4.23592	missense_variant	MODERATE	SDHB	NM_003000.3	protein_coding	NM_003000.3:c.530G>T	NP_002991.2:p.Arg177Leu	543	530	177	R/L	cGt/cTt	CM130559	-1	deleterious(0.02)
	1	17354254	17027759	C	G	0	0.01	0.07	0.47		-591	680	-10	1	0	0	0.24	0.23	0.31	0.38	0.47	0	missense_variant	exon	5	donor	10	-	-	-	-	-	29.8	4.24606	missense_variant	MODERATE	SDHB	NM_003000.3	protein_coding	NM_003000.3:c.530G>C	NP_002991.2:p.Arg177Pro	543	530	177	R/P	cGt/cCt	CM130559	-1	deleterious(0)
	1	17354254	17027759	C	T	0	0.02	0.02	0.47		-591	106	-10	1	0	0	0.93	0.91	0.31	0.33	0.47	0	missense_variant	exon	5	donor	10	-	-	-	-	-	25.3	3.60064	missense_variant	MODERATE	SDHB	NM_003000.3	protein_coding	NM_003000.3:c.530G>A	NP_002991.2:p.Arg177His	543	530	177	R/H	cGt/cAt	rs150437793,CM130559	-1	deleterious(0.01)
	1	17354253	17027758	A	G	0.02	0	0.11	0.47		107	242	-9	2	0.93	0.95	0.01	0.01	0.31	0.41	0.47	0	synonymous_variant	exon	5	donor	9	-	-	-	-	-	9.169	0.475502	synonymous_variant	LOW	SDHB	NM_003000.3	protein_coding	NM_003000.3:c.531T>C	NP_002991.2:p.Arg177%3D	544	531	177	R	cgT/cgC		-1
	1	17354253	17027758	A	C	0	0	0.03	0.47		107	978	-167	2	0.93	0.94	0.94	0.94	0.3	0.33	0.47	0	synonymous_variant	exon	5	donor	9	-	-	-	-	-	9	0.458255	synonymous_variant	LOW	SDHB	NM_003000.3	protein_coding	NM_003000.3:c.531T>G	NP_002991.2:p.Arg177%3D	544	531	177	R	cgT/cgG		-1
	1	17354253	17027758	A	T	0	0	0.04	0.47		107	978	-9	2	0.93	0.94	0.94	0.94	0.31	0.35	0.47	0	synonymous_variant	exon	5	donor	9	-	-	-	-	-	9.017	0.459986	synonymous_variant	LOW	SDHB	NM_003000.3	protein_coding	NM_003000.3:c.531T>A	NP_002991.2:p.Arg177%3D	544	531	177	R	cgT/cgA		-1
	1	17354252	17027757	C	A	0	0.16	0.05	0.46		-8	108	36	3	0	0	0.93	0.77	0.1	0.15	0.47	0	stop_gained	exon	5	donor	8	-	-	-	-	-	40	8.02345	stop_gained	HIGH	SDHB	NM_003000.3	protein_coding	NM_003000.3:c.532G>T	NP_002991.2:p.Glu178Ter	545	532	178	E/*	Gag/Tag	CM1210443	-1
	1	17354252	17027757	C	G	0.01	0	0.15	0.46		108	243	-8	3	0.93	0.94	0.01	0.01	0.31	0.46	0.47	0.01	missense_variant	exon	5	donor	8	-	-	-	-	-	22.3	2.37189	missense_variant	MODERATE	SDHB	NM_003000.3	protein_coding	NM_003000.3:c.532G>C	NP_002991.2:p.Glu178Gln	545	532	178	E/Q	Gag/Cag	CM1210443	-1	tolerated(0.43)
	1	17354252	17027757	C	T	0.06	0	0.5	0.25		682	-828	3	-166	0.24	0.3	0	0	0.47	0.97	0.3	0.06	missense_variant	exon	5	donor	8	-	-	-	-	-	23.1	2.77341	missense_variant	MODERATE	SDHB	NM_003000.3	protein_coding	NM_003000.3:c.532G>A	NP_002991.2:p.Glu178Lys	545	532	178	E/K	Gag/Aag	CM1210443	-1	tolerated(1)
	1	17354251	17027756	T	C	0	0.02	0.05	0.46		-588	109	37	4	0	0	0.93	0.91	0.1	0.16	0.47	0	missense_variant	exon	5	donor	7	-	-	-	-	-	25.5	3.6299	missense_variant	MODERATE	SDHB	NM_003000.3	protein_coding	NM_003000.3:c.533A>G	NP_002991.2:p.Glu178Gly	546	533	178	E/G	gAg/gGg		-1	deleterious(0.04)
	1	17354251	17027756	T	G	0	0	0.05	0.45		1836	109	-165	4	0.01	0.01	0.93	0.93	0.3	0.35	0.47	0.02	missense_variant	exon	5	donor	7	-	-	-	-	-	22.7	2.55157	missense_variant	MODERATE	SDHB	NM_003000.3	protein_coding	NM_003000.3:c.533A>C	NP_002991.2:p.Glu178Ala	546	533	178	E/A	gAg/gCg		-1	tolerated(0.68)
	1	17354251	17027756	T	A	0	0.01	0.04	0.47		-611	109	37	4	0	0	0.93	0.92	0.1	0.14	0.47	0	missense_variant	exon	5	donor	7	-	-	-	-	-	23.8	3.09958	missense_variant	MODERATE	SDHB	NM_003000.3	protein_coding	NM_003000.3:c.533A>T	NP_002991.2:p.Glu178Val	546	533	178	E/V	gAg/gTg		-1	tolerated(0.05)
	1	17354250	17027755	C	A	0	0.02	0.03	0.47		-15	110	-6	5	0	0	0.93	0.91	0.31	0.34	0.47	0	missense_variant	exon	5	donor	6	-	-	-	-	-	21.8	2.25428	missense_variant	MODERATE	SDHB	NM_003000.3	protein_coding	NM_003000.3:c.534G>T	NP_002991.2:p.Glu178Asp	547	534	178	E/D	gaG/gaT		-1	tolerated(0.14)
	1	17354250	17027755	C	G	0	0	0.06	0.47		110	981	-6	5	0.93	0.93	0.94	0.94	0.31	0.37	0.47	0	missense_variant	exon	5	donor	6	-	-	-	-	-	21.2	2.17299	missense_variant	MODERATE	SDHB	NM_003000.3	protein_coding	NM_003000.3:c.534G>C	NP_002991.2:p.Glu178Asp	547	534	178	E/D	gaG/gaC		-1	tolerated(0.14)
	1	17354250	17027755	C	T	0	0	0.05	0.47		-587	981	-6	5	0	0	0.94	0.94	0.31	0.36	0.47	0	synonymous_variant	exon	5	donor	6	-	-	-	-	-	11.9	0.792963	synonymous_variant	LOW	SDHB	NM_003000.3	protein_coding	NM_003000.3:c.534G>A	NP_002991.2:p.Glu178%3D	547	534	178	E	gaG/gaA		-1
	1	17354249	17027754	T	G	0.04	0	0.32	0.1		685	-825	6	-5	0.24	0.28	0	0	0.47	0.78	0.31	0.2	missense_variant	exon	5	donor	5	-	-	-	-	-	29.8	4.24078	missense_variant	MODERATE	SDHB	NM_003000.3	protein_coding	NM_003000.3:c.535A>C	NP_002991.2:p.Lys179Gln	548	535	179	K/Q	Aaa/Caa		-1	deleterious(0.04)
	1	17354249	17027754	T	A	0.07	0	0.53	0.3		111	1838	6	-5	0.93	1	0.01	0.01	0.47	1	0.31	0	stop_gained	exon	5	donor	5	-	-	-	-	-	46	8.90043	stop_gained	HIGH	SDHB	NM_003000.3	protein_coding	NM_003000.3:c.535A>T	NP_002991.2:p.Lys179Ter	548	535	179	K/*	Aaa/Taa		-1
	1	17354246	17027751	G	C	0	0.03	0.03	0.32		-606	114	1	9	0	0	0.93	0.9	0	0.03	0.47	0.14	missense_variant,splice_region_variant	exon	5	donor	2	-1.893	1.648	-0.245	0.340356952414452	-	25.6	3.66958	missense_variant,splice_region_variant	MODERATE	SDHB	NM_003000.3	protein_coding	NM_003000.3:c.538C>G	NP_002991.2:p.Leu180Val	551	538	180	L/V	Ctg/Gtg		-1	deleterious(0.01)
	1	17354245	17027750	A	T	0.06	0	0.69	0.41		115	-821	-1	10	0.93	0.99	0	0	0.31	1	0.47	0.06	missense_variant,splice_region_variant	exon	5	donor	1	4.445	-4.690	-0.245	0.578252861223647	-	31	4.32185	missense_variant,splice_region_variant	MODERATE	SDHB	NM_003000.3	protein_coding	NM_003000.3:c.539T>A	NP_002991.2:p.Leu180Gln	552	539	180	L/Q	cTg/cAg		-1	deleterious(0)
	1	17354244	17027749	C	T	0	0.03	0.17	0.3		-566	116	11	0	0	0	0.93	0.9	0.47	0.64	0.31	0	splice_region_variant,synonymous_variant	exon	5	donor	0	-11.446	11.201	-0.245	0.99998911686837	-	23.3	2.86503	splice_region_variant,synonymous_variant	LOW	SDHB	NM_003000.3	protein_coding	NM_003000.3:c.540G>A	NP_002991.2:p.Leu180%3D	553	540	180	L	ctG/ctA	rs528442805,CS077378,CS132978	-1
	1	17354244	17027749	C	A	0.02	0	0.25	0.31		690	0	11	0	0.24	0.26	0	0	0.47	0.72	0.31	0	splice_region_variant,synonymous_variant	exon	5	donor	0	-12.222	11.978	-0.245	0.999986145902855	-	23.2	2.84274	splice_region_variant,synonymous_variant	LOW	SDHB	NM_003000.3	protein_coding	NM_003000.3:c.540G>T	NP_002991.2:p.Leu180%3D	553	540	180	L	ctG/ctT	CS077378,CS132978	-1
	1	17354244	17027749	C	G	0.04	0	0.1	0.31		690	0	-158	0	0.24	0.29	0	0	0.3	0.41	0.31	0	splice_region_variant,synonymous_variant	exon	5	donor	0	-7.637	7.392	-0.245	0.999976197133923	-	22.8	2.6148	splice_region_variant,synonymous_variant	LOW	SDHB	NM_003000.3	protein_coding	NM_003000.3:c.540G>C	NP_002991.2:p.Leu180%3D	553	540	180	L	ctG/ctC	CS077378,CS132978	-1
	1	17354243	17027748	C	A	0	0	0.15	0.31		691	1	12	1	0.24	0.25	0	0	0.47	0.62	0.31	0	splice_donor_variant	intron	5	donor	1	-8.749	8.504	-0.245	0.999975504823821	-	32	4.78179	splice_donor_variant	HIGH	SDHB	NM_003000.3	protein_coding	NM_003000.3:c.540+1G>T								-1
	1	17354243	17027748	C	G	0	0	0.04	0.31		691	1	12	1	0.24	0.25	0	0	0.47	0.51	0.31	0	splice_donor_variant	intron	5	donor	1	-8.517	8.273	-0.245	0.999975504823821	-	32	4.44058	splice_donor_variant	HIGH	SDHB	NM_003000.3	protein_coding	NM_003000.3:c.540+1G>C								-1
	1	17354243	17027748	C	T	0	0	0.07	0.31		691	988	12	1	0.24	0.25	0.94	0.94	0.47	0.54	0.31	0	splice_donor_variant	intron	5	donor	1	-8.427	8.182	-0.245	0.999975504823821	-	32	4.49812	splice_donor_variant	HIGH	SDHB	NM_003000.3	protein_coding	NM_003000.3:c.540+1G>A							rs1553177667	-1
	1	17354242	17027747	A	G	0	0.01	0.05	0.31		118	692	-156	2	0.93	0.93	0.24	0.24	0.3	0.36	0.31	0	splice_donor_variant	intron	5	donor	2	-7.999	7.754	-0.245	0.999016289570897	-	31	4.29184	splice_donor_variant	HIGH	SDHB	NM_003000.3	protein_coding	NM_003000.3:c.540+2T>C							CS094760	-1
	1	17354242	17027747	A	C	0	0.01	0.11	0.31		-564	692	13	2	0	0	0.24	0.23	0.47	0.57	0.31	0	splice_donor_variant	intron	5	donor	2	-7.892	7.647	-0.245	0.999926102992308	-	32	4.43823	splice_donor_variant	HIGH	SDHB	NM_003000.3	protein_coding	NM_003000.3:c.540+2T>G							CS094760	-1
	1	17354242	17027747	A	T	0.02	0	0.12	0.31		118	-602	-156	2	0.93	0.95	0	0	0.3	0.42	0.31	0	splice_donor_variant	intron	5	donor	2	-8.428	8.183	-0.245	0.999926102992308	-	31	4.30617	splice_donor_variant	HIGH	SDHB	NM_003000.3	protein_coding	NM_003000.3:c.540+2T>A							CS094760	-1
	1	17354241	17027746	G	C	0.06	0	0.69	0.28		119	-817	3	14	0.93	0.99	0	0	0.31	0.99	0.47	0.19	splice_donor_region_variant,intron_variant	intron	5	donor	3	3.021	-3.266	-0.245	0.00150266306465237	-	14.38	1.15235	splice_donor_region_variant,intron_variant	LOW	SDHB	NM_003000.3	protein_coding	NM_003000.3:c.540+3C>G								-1
	1	17354241	17027746	G	T	0.07	0	0.69	0.46		119	1846	3	14	0.93	1	0.01	0.01	0.31	1	0.47	0	splice_donor_region_variant,intron_variant	intron	5	donor	3	5.990	-6.235	-0.245	0.00108291636104762	-	14.44	1.16243	splice_donor_region_variant,intron_variant	LOW	SDHB	NM_003000.3	protein_coding	NM_003000.3:c.540+3C>A								-1
	1	17354239	17027744	A	C	0.07	0	0.69	0.47		121	992	5	16	0.93	1	0.94	0.94	0.31	1	0.47	0	splice_donor_5th_base_variant,intron_variant	intron	5	donor	5	6.603	-6.847	-0.245	6.84464595509727E-5	-	12	0.80559	splice_donor_5th_base_variant,intron_variant	LOW	SDHB	NM_003000.3	protein_coding	NM_003000.3:c.540+5T>G								-1
	1	17354236	17027741	C	A	0.04	0	0.31	0.02		698	-812	8	-150	0.24	0.28	0	0	0.31	0.61	0.3	0.28	splice_region_variant,intron_variant	intron	5	donor	8	-	-	-	2.11315475466748E-4	-	9.304	0.489476	splice_region_variant,intron_variant	LOW	SDHB	NM_003000.3	protein_coding	NM_003000.3:c.540+8G>T								-1
	1	17354232	17027737	G	C	0.02	0	0.34	0.06		128	263	5	12	0.93	0.95	0.01	0.01	0	0.34	0.31	0.25	intron_variant	intron	5	donor	12	-	-	-	-	-	12.07	0.815438	intron_variant	MODIFIER	SDHB	NM_003000.3	protein_coding	NM_003000.3:c.540+12C>G								-1
	1	17354228	17027733	A	C	0.03	0	0.29	0.14		132	267	1	16	0.93	0.96	0.01	0.01	0.01	0.3	0.31	0.16	intron_variant	intron	5	donor	16	-	-	-	-	-	12.16	0.826076	intron_variant	MODIFIER	SDHB	NM_003000.3	protein_coding	NM_003000.3:c.540+16T>G								-1
	1	17354195	17027700	T	C	0.05	0	0.91	0.23		165	300	1	-109	0.93	0.98	0.01	0.01	0	0.91	0.3	0.08	intron_variant	intron	5	donor	49	-	-	-	-	-	6.729	0.26295	intron_variant	MODIFIER	SDHB	NM_003000.3	protein_coding	NM_003000.3:c.540+49A>G							rs939473191	-1
	1	17354183	17027688	T	A	0.06	0	0.94	0.28		177	312	2	-97	0.93	0.99	0.01	0.01	0	0.94	0.3	0.02	intron_variant	intron	5	donor	61	-	-	-	-	-	6.359	0.236014	intron_variant	MODIFIER	SDHB	NM_003000.3	protein_coding	NM_003000.3:c.540+61A>T								-1
	1	17354171	17027676	G	A	0	0.01	0.3	0.19		189	763	2	-85	0.93	0.93	0.24	0.23	0	0.3	0.3	0.11	intron_variant	intron	5	donor	73	-	-	-	-	-	0.906	-0.165262	intron_variant	MODIFIER	SDHB	NM_003000.3	protein_coding	NM_003000.3:c.540+73C>T								-1
	1	17354167	17027672	C	A	0.06	0	0.98	0.32		193	328	2	88	0.93	0.99	0.01	0.01	0	0.98	0.47	0.15	intron_variant	intron	5	donor	77	-	-	-	-	-	2.213	-0.028753	intron_variant	MODIFIER	SDHB	NM_003000.3	protein_coding	NM_003000.3:c.540+77G>T								-1
	1	17354163	17027668	T	C	0.01	0	0.27	0.12		197	332	1	81	0.93	0.94	0.01	0.01	0	0.27	0.31	0.19	intron_variant	intron	5	donor	81	-	-	-	-	-	2.28	-0.023789	intron_variant	MODIFIER	SDHB	NM_003000.3	protein_coding	NM_003000.3:c.540+81A>G							rs1042379132	-1
	1	17354158	17027663	G	C	0.02	0	0.77	0.19		202	1073	1	-72	0.93	0.95	0.94	0.94	0	0.77	0.3	0.11	intron_variant	intron	5	donor	86	-	-	-	-	-	1.546	-0.085531	intron_variant	MODIFIER	SDHB	NM_003000.3	protein_coding	NM_003000.3:c.540+86C>G								-1
	1	17354152	17027657	G	A	0.03	0	0.77	0.24		208	343	2	-66	0.93	0.96	0.01	0.01	0	0.77	0.3	0.06	intron_variant	intron	5	donor	92	-	-	-	-	-	4.914	0.139906	intron_variant	MODIFIER	SDHB	NM_003000.3	protein_coding	NM_003000.3:c.540+92C>T							rs1570947781	-1
	1	17354142	17027647	T	G	0.03	0	0.26	0.14		792	353	-56	113	0.24	0.28	0.01	0.01	0.3	0.56	0.47	0.32	intron_variant	intron	5	donor	102	-	-	-	-	-	2.176	-0.031507	intron_variant	MODIFIER	SDHB	NM_003000.3	protein_coding	NM_003000.3:c.540+102A>C								-1
	1	17354130	17027635	T	A	0.01	0.01	0.34	0.23		230	804	2	-44	0.93	0.94	0.24	0.23	0	0.34	0.3	0.08	intron_variant	intron	5	donor	114	-	-	-	-	-	10.95	0.676217	intron_variant	MODIFIER	SDHB	NM_003000.3	protein_coding	NM_003000.3:c.540+114A>T								-1
	1	17354114	17027619	C	G	0.03	0	0.35	0.19		246	381	-28	130	0.93	0.96	0.01	0.01	0.3	0.65	0.31	0.12	intron_variant	intron	5	donor	130	-	-	-	-	-	2.378	-0.016818	intron_variant	MODIFIER	SDHB	NM_003000.3	protein_coding	NM_003000.3:c.540+130G>C								-1
	1	17354113	17027618	C	T	0.02	0	0.29	0.16		247	382	-27	131	0.93	0.95	0.01	0.01	0.3	0.6	0.31	0.15	intron_variant	intron	5	donor	131	-	-	-	-	-	5.899	0.203929	intron_variant	MODIFIER	SDHB	NM_003000.3	protein_coding	NM_003000.3:c.540+131G>A								-1
	1	17354113	17027618	C	G	0.03	0	0.32	0.18		247	382	-27	131	0.93	0.96	0.01	0.01	0.3	0.63	0.31	0.12	intron_variant	intron	5	donor	131	-	-	-	-	-	4.999	0.145209	intron_variant	MODIFIER	SDHB	NM_003000.3	protein_coding	NM_003000.3:c.540+131G>C							rs999493734	-1
	1	17354112	17027617	C	G	0.02	0	0.27	0.15		822	383	-26	132	0.24	0.26	0.01	0.01	0.3	0.57	0.31	0.16	intron_variant	intron	5	donor	132	-	-	-	-	-	0.424	-0.278482	intron_variant	MODIFIER	SDHB	NM_003000.3	protein_coding	NM_003000.3:c.540+132G>C								-1
	1	17354112	17027617	C	T	0.03	0	0.36	0.2		248	383	-26	132	0.93	0.96	0.01	0.01	0.3	0.67	0.31	0.11	intron_variant	intron	5	donor	132	-	-	-	-	-	0.63	-0.219761	intron_variant	MODIFIER	SDHB	NM_003000.3	protein_coding	NM_003000.3:c.540+132G>A							rs967297166	-1
	1	17354109	17027614	C	T	0	0	0.26	0.12		251	825	4	135	0.93	0.94	0.24	0.24	0	0.27	0.31	0.19	intron_variant	intron	5	donor	135	-	-	-	-	-	4.104	0.090547	intron_variant	MODIFIER	SDHB	NM_003000.3	protein_coding	NM_003000.3:c.540+135G>A								-1
	1	17354109	17027614	C	G	0.02	0	0.34	0.18		251	386	-23	135	0.93	0.95	0.01	0.01	0.3	0.65	0.31	0.13	intron_variant	intron	5	donor	135	-	-	-	-	-	3.124	0.031827	intron_variant	MODIFIER	SDHB	NM_003000.3	protein_coding	NM_003000.3:c.540+135G>C								-1
	1	17354108	17027613	C	T	0.02	0	0.34	0.17		826	387	-22	136	0.24	0.27	0.01	0.01	0.3	0.65	0.31	0.14	intron_variant	intron	5	donor	136	-	-	-	-	-	1.401	-0.100613	intron_variant	MODIFIER	SDHB	NM_003000.3	protein_coding	NM_003000.3:c.540+136G>A								-1
	1	17354108	17027613	C	G	0.03	0	0.3	0.16		826	387	-22	136	0.24	0.27	0.01	0.01	0.3	0.6	0.31	0.15	intron_variant	intron	5	donor	136	-	-	-	-	-	0.943	-0.159334	intron_variant	MODIFIER	SDHB	NM_003000.3	protein_coding	NM_003000.3:c.540+136G>C								-1
	1	17354093	17027598	T	G	0.02	0	0.28	0.15		267	-2	-7	151	0.93	0.95	0	0	0.3	0.59	0.31	0.16	intron_variant	intron	5	donor	151	-	-	-	-	-	2.475	-0.009992	intron_variant	MODIFIER	SDHB	NM_003000.3	protein_coding	NM_003000.3:c.540+151A>C								-1
	1	17354086	17027591	C	A	0	0.01	0.07	0.26		409	274	158	0	0.01	0.01	0.93	0.92	0.31	0.38	0.3	0.04	intron_variant	intron	5	donor	158	-	-	-	-	-	1.476	-0.09269	intron_variant	MODIFIER	SDHB	NM_003000.3	protein_coding	NM_003000.3:c.540+158G>T								-1
	1	17354086	17027591	C	T	0	0.01	0.08	0.26		409	848	158	0	0.01	0.01	0.24	0.23	0.31	0.39	0.3	0.04	intron_variant	intron	5	donor	158	-	-	-	-	-	2.008	-0.04452	intron_variant	MODIFIER	SDHB	NM_003000.3	protein_coding	NM_003000.3:c.540+158G>A								-1
	1	17354086	17027591	C	G	0	0.01	0.06	0.26		409	848	158	0	0.01	0.01	0.24	0.24	0.31	0.37	0.3	0.04	intron_variant	intron	5	donor	158	-	-	-	-	-	1.376	-0.103241	intron_variant	MODIFIER	SDHB	NM_003000.3	protein_coding	NM_003000.3:c.540+158G>C								-1
	1	17354085	17027590	C	T	0	0	0.09	0.3		1146	275	159	1	0.94	0.94	0.93	0.93	0.31	0.4	0.3	0	intron_variant	intron	5	donor	159	-	-	-	-	-	4.193	0.095842	intron_variant	MODIFIER	SDHB	NM_003000.3	protein_coding	NM_003000.3:c.540+159G>A								-1
	1	17354085	17027590	C	A	0	0.01	0.1	0.3		1146	275	159	1	0.94	0.94	0.93	0.92	0.31	0.41	0.3	0	intron_variant	intron	5	donor	159	-	-	-	-	-	3.385	0.047672	intron_variant	MODIFIER	SDHB	NM_003000.3	protein_coding	NM_003000.3:c.540+159G>T								-1
	1	17354085	17027590	C	G	0	0.01	0.08	0.3		1146	275	159	1	0.94	0.94	0.93	0.92	0.31	0.39	0.3	0	intron_variant	intron	5	donor	159	-	-	-	-	-	3.211	0.037121	intron_variant	MODIFIER	SDHB	NM_003000.3	protein_coding	NM_003000.3:c.540+159G>C								-1
	1	17354084	17027589	A	C	0	0	0.11	0.3		1147	-660	160	2	0.94	0.95	0	0	0.31	0.42	0.3	0	intron_variant	intron	5	donor	160	-	-	-	-	-	1.026	-0.146893	intron_variant	MODIFIER	SDHB	NM_003000.3	protein_coding	NM_003000.3:c.540+160T>G								-1
	1	17354084	17027589	A	G	0	0.01	0.1	0.3		1147	276	160	2	0.94	0.94	0.93	0.92	0.31	0.4	0.3	0	intron_variant	intron	5	donor	160	-	-	-	-	-	1.195	-0.124349	intron_variant	MODIFIER	SDHB	NM_003000.3	protein_coding	NM_003000.3:c.540+160T>C								-1
	1	17354084	17027589	A	T	0	0.02	0.12	0.3		1147	276	160	2	0.94	0.94	0.93	0.92	0.31	0.42	0.3	0	intron_variant	intron	5	donor	160	-	-	-	-	-	1.076	-0.139865	intron_variant	MODIFIER	SDHB	NM_003000.3	protein_coding	NM_003000.3:c.540+160T>A								-1
	1	17354083	17027588	C	G	0	0.01	0.1	0.29		412	277	161	3	0.01	0.01	0.93	0.92	0.31	0.41	0.3	0.01	intron_variant	intron	5	donor	161	-	-	-	-	-	4.154	0.093529	intron_variant	MODIFIER	SDHB	NM_003000.3	protein_coding	NM_003000.3:c.540+161G>C								-1
	1	17354083	17027588	C	A	0	0.01	0.1	0.29		412	277	161	3	0.01	0.01	0.93	0.92	0.31	0.41	0.3	0.02	intron_variant	intron	5	donor	161	-	-	-	-	-	4.33	0.10408	intron_variant	MODIFIER	SDHB	NM_003000.3	protein_coding	NM_003000.3:c.540+161G>T								-1
	1	17354082	17027587	T	A	0	0.01	0.11	0.3		1149	278	162	4	0.94	0.94	0.93	0.93	0.31	0.42	0.3	0	intron_variant	intron	5	donor	162	-	-	-	-	-	2.577	-0.003114	intron_variant	MODIFIER	SDHB	NM_003000.3	protein_coding	NM_003000.3:c.540+162A>T								-1
	1	17354082	17027587	T	C	0.01	0	0.11	0.3		278	-658	162	4	0.93	0.94	0	0	0.31	0.41	0.3	0	intron_variant	intron	5	donor	162	-	-	-	-	-	2.826	0.013177	intron_variant	MODIFIER	SDHB	NM_003000.3	protein_coding	NM_003000.3:c.540+162A>G								-1
	1	17354082	17027587	T	G	0	0.01	0.1	0.29		1149	278	162	4	0.94	0.94	0.93	0.92	0.31	0.4	0.3	0.01	intron_variant	intron	5	donor	162	-	-	-	-	-	2.457	-0.011235	intron_variant	MODIFIER	SDHB	NM_003000.3	protein_coding	NM_003000.3:c.540+162A>C								-1
	1	17354081	17027586	C	G	0	0	0.08	0.3		1150	279	163	5	0.94	0.95	0.93	0.93	0.31	0.39	0.3	0	intron_variant	intron	5	donor	163	-	-	-	-	-	3.686	0.065674	intron_variant	MODIFIER	SDHB	NM_003000.3	protein_coding	NM_003000.3:c.540+163G>C								-1
	1	17354081	17027586	C	T	0	0.01	0.09	0.3		1150	279	163	5	0.94	0.94	0.93	0.92	0.31	0.4	0.3	0	intron_variant	intron	5	donor	163	-	-	-	-	-	4.664	0.124394	intron_variant	MODIFIER	SDHB	NM_003000.3	protein_coding	NM_003000.3:c.540+163G>A							rs1011520093	-1
	1	17354081	17027586	C	A	0	0.01	0.1	0.3		1150	279	163	5	0.94	0.94	0.93	0.93	0.31	0.4	0.3	0	intron_variant	intron	5	donor	163	-	-	-	-	-	3.864	0.076224	intron_variant	MODIFIER	SDHB	NM_003000.3	protein_coding	NM_003000.3:c.540+163G>T								-1
	1	17354080	17027585	A	C	0.01	0	0.06	0.3		854	-402	164	6	0.24	0.25	0	0	0.31	0.37	0.3	0.01	intron_variant	intron	5	donor	164	-	-	-	-	-	2.692	0.004529	intron_variant	MODIFIER	SDHB	NM_003000.3	protein_coding	NM_003000.3:c.540+164T>G								-1
	1	17354080	17027585	A	G	0.01	0	0.05	0.28		1151	-402	164	6	0.94	0.95	0	0	0.31	0.36	0.3	0.03	intron_variant	intron	5	donor	164	-	-	-	-	-	3.047	0.027073	intron_variant	MODIFIER	SDHB	NM_003000.3	protein_coding	NM_003000.3:c.540+164T>C								-1
	1	17354080	17027585	A	T	0.01	0	0.05	0.29		1151	-402	-485	6	0.94	0.95	0	0	0.17	0.22	0.3	0.01	intron_variant	intron	5	donor	164	-	-	-	-	-	2.8	0.011557	intron_variant	MODIFIER	SDHB	NM_003000.3	protein_coding	NM_003000.3:c.540+164T>A								-1
[truncated: 10 more columns]

## Sheet: Negative controls
#CHROM	POS	Location	REF	ALT	HGVSc	HGVSg	DS_AG	DS_AL	DS_DG	DS_DL	DP_AG	DP_AL	DP_DG	DP_DL	DS_AG_REF	DS_AG_ALT	DS_AL_REF	DS_AL_ALT	DS_DG_REF	DS_DG_ALT	DS_DL_REF	DS_DL_ALT	Consequence_x	feature	acc_don	dist_exin	MaxEntScan_alt	MaxEntScan_diff	MaxEntScan_ref	ada_score	rf_score	CADD_PHRED	CADD_RAW	Consequence_y	IMPACT	SYMBOL	Feature2	BIOTYPE	HGVSc2	HGVSp	cDNA_position	CDS_position	Protein_position	Amino_acids	Codons	Existing_variation	STRAND	SIFT	PolyPhen
1	17033121	Exon 3	A	G	NM_003000.3:c.225T>C	1-17033121-A-G	0.01	0	0.03	0	24		-61	-205									synonymous_variant
1	17028723	Exon 4	A	G	NM_003000.3:c.300T>C	1-17028723-A-G	0	0	0.09	0	13		-69	46									synonymous_variant
[truncated: 16 more columns]
