# Supplementary material for: Minigene-based characterization and classification of splice-associated variants in succinate dehydrogenase B
Source: Research Square preprint supplement (doi:10.21203/rs.3.rs-8661010/v1), 2026-02-24
Supplement: Supplementary file 2 [file 6201530396b3018639e199a3.xlsx]

## Sheet: Sheet1
Variant	HGVSc	HGVSp (pre-assesment)	PVS1	PVS1_S	PVS1_M	PVS1_N/A	BP7_S	N/A	Combined strength	Overall RNA strength	ACMG codes without RNA strength	ACMG codes with RNA strength	ACMG points without RNA strength	ACMG points with RNA strength	ACMG class without RNA strength	ACMG class with RNA strength
V7	c.197A>G	p.Asn66Ser						0.18 (r.197_200del, p.(Lys67ValfsTer8)); 0.82 (FL_WT)	N/A (1.00)	N/A
V2	c.200+1G>A							0.06 (r.73_200del, p.(Ala25MetfsTer12)); 0.83 (r.200_201ins[200+1_201-1], p.(Cys68Ter)); 0.04 (r.200_201ins[a; 200+2_200+30; 201-2_201-1], p.(Cys68Ter)); 0.02 (r.200_201ins[200+1_200+236], p.(Cys68Ter)); 0.05 (FL_WT)	N/A (1.00)	N/A
V8	c.200+5G>C							0.01 (N/A); 0.02 (r.73_200del, p.(Ala25MetfsTer12)); 0.01 (r.73_286del, p.(Arg27ValTer6)); 0.86 (r.200_201ins[200+1_201-1], p.(Cys68Ter)); 0.03 (r.200_201ins[200+1_200+30; 201-2_201-1], p.(Cys68Ter)); 0.02 (r.200_201ins[200+1_200+236], p.(Cys68Ter)); 0.01 (r.201_286delins200+1_200+236, p.(Cys68Ter)); 0.04 (FL_WT)	N/A (1.00)	N/A
V10	c.201-14T>G		0.74 (r.201_286del, p.(Cys68HisfsTer21)); 0.09 (r.200_201ins[201-13_201-1], p.(Lys67AsnfsTer4))				0.17 (FL_WT)		PVS1 (0.83) + BP7_S (0.17)	PVS1_Moderate (RNA)	PM2 Supporting PP3 Supporting	PM2 Supporting PVS1 Moderate (RNA)	2	3	VUS	VUS
V13	c.201-1G>C		0.08 (r.201_286del, p.(Cys68HisfsTer21)); 0.36 (r.201_234del, p.(Cys68LeufsTer8)); 0.40 (r.201_202del, p.(Cys68TrpfsTer11)); 0.09 (r.200_201ins[201-4_201-1], p.(Lys67AsnfsTer14))		0.05 (r.201_206del, p.(Lys67_Gly69del))		0.03 (FL_WT)		PVS1 (0.93) + PVS1_M (0.05) + BP7_S (0.03)	PVS1_Strong (RNA)	PVS1 Very Strong PS1 Supporting PM2 Supporting	PVS1 Strong (RNA) PS1 Strong PM2 Supporting	10	9	Pathogenic	Likely Pathogenic
V56	c.201-2A>C		0.89 (r.201_286del, p.(Cys68HisfsTer21)); 0.06 (r.201_234del, p.(Cys68LeufsTer8)); 0.02 (r.200_201ins[201-4_201-1], p.(Lys67AsnfsTer14))				0.03 (FL_WT)		PVS1 (0.97) + BP7_S (0.03)	PVS1_Strong (RNA)	PVS1 Very Strong PS1 Supporting PM2 Supporting PS4 Moderate	PVS1 Strong (RNA) PS1 Strong PM2 Supporting PS4 Moderate	12	11	Pathogenic	Pathogenic
V12	c.201-2A>T		0.89 (r.201_286del, p.(Cys68HisfsTer21)); 0.07 (r.201_234del, p.(Cys68LeufsTer8))				0.04 (FL_WT)		PVS1 (0.96) + BP7_S (0.04)	PVS1_Strong (RNA)	PVS1 Very Strong PS1 Supporting PM2 Supporting	PVS1 Strong (RNA) PS1 Strong PM2 Supporting	10	9	Pathogenic	Likely Pathogenic
V48	c.201-3T>A		0.34 (r.201_286del, p.(Cys68HisfsTer21))				0.66 (FL_WT)		PVS1 (0.34) + BP7_S (0.66)	PVS1_N/A (RNA)6	PM2 Supporting PP3 Supporting		2		VUS
V9	c.201-91C>G		0.27 (r.200-201ins[201-211_201-92], p.(Cys68AsnTer6)); 0.03 (r.200-201ins[201-226_201-92], p.(Lys67AsnTer12))				0.65 (FL_WT)	0.05 (r.200_201ins[200+1_201-1], p.(Cys68Ter))1	PVS1 (0.30) + BP7_S (0.65) + N/A (0.05)1	PVS1_N/A (RNA)6	PM2 Supporting PP3 Supporting		2		VUS
V47	c.201-96A>G		0.35 (r.200-201ins[201-211_201-97], p.(Cys68AsnTer6)); 0.04 (r.200-201ins[201-226_201-97], p.(Lys67AsnTer12))				0.61 (FL_WT)		PVS1 (0.39) + BP7_S (0.61)	PVS1_N/A (RNA)6	PM2 Supporting PP3 Supporting		2		VUS
V49	c.202T>A	p.Cys68Ser	0.11 (r.201_286del, p.(Cys68HisfsTer21))		0.02 (r.201_203del, p.(Lys67_Cys68del))		0.87 (FL_WT)		PVS1 (0.11) + PVS1_M (0.02) + BP7_S (0.87)	PVS1_N/A (RNA)6	PM2 Supporting PP3 Supporting		2		VUS
V54	c.219G>A	p.Leu73=					1.00 (FL_WT)		BP7_S (1.00)	BP7_S (RNA)	PM2 Supporting PP3 Supporting	PM2 Supporting PP3 Supporting BP7 Strong (RNA)	2	-2	VUS	Likely Benign
V4	c.225T>C	p.Ala75=					1.00 (FL_WT)		BP7_S (1.00)	BP7_S (RNA)	PM2 Supporting BS2 Supporting BP7 Supporting	PM2 Supporting BS2 Supporting BP7 Strong (RNA)	-1	-4	Likely Benign	Likely Benign
V14	c.232A>T	p.Lys78Ter	0.06 (r.201_286del, p.(Cys68HisfsTer21))				0.94 (FL_WT)		PVS1 (0.06) + BP7_S (0.94)	BP7_S (RNA) not applicable7	PVS1 Very Strong PM2 Supporting		9		Likely Pathogenic
V55	c.245A>T	p.Glu82Val					1.00 (FL_WT)		BP7_S (1.00)	BP7_S (RNA) not applicable7	PM2 Supporting PP3 Supporting		2		VUS
V1	c.286+1G>A		0.25 (r.201_286del, p.(Cys68HisfsTer21)); 0.75 (r.286_287ins[286+1_286+144], p.(Gly96AspfsTer37))						PVS1 (1.00)	PVS1_Strong (RNA)	PVS1 Very Strong PS1 Supporting PM2 Supporting PS4 Moderate	PVS1 Strong (RNA) PS1 Strong PM2 Supporting PS4 Moderate	12	11	Pathogenic	Pathogenic
V16	c.286+2T>A		0.50 (r.201_286del, p.(Cys68HisfsTer21)); 0.50 (r.286_287ins[286+1_286+144], p.(Ile97GlufsTer36))						PVS1 (1.00)	PVS1_Strong (RNA)	PVS1 Very Strong PS1 Supporting PM2 Supporting PS4 Moderate	PVS1 Strong (RNA) PS1 Strong PM2 Supporting PS4 Moderate	12	11	Pathogenic	Pathogenic
V17	c.286+3G>C		0.64 (r.201_286del, p.(Cys68HisfsTer21)); 0.04 (r.286_287ins[286+1_286+144], p.(Ile97GlnfsTer36))				0.32 (FL_WT)		PVS1 (0.68) + BP7_S (0.32)	PVS1_N/A (RNA)6	PM2 Supporting PP3 Supporting		2		VUS
V18	c.286+4A>T		0.42 (r.201_286del, p.(Cys68HisfsTer21)); 0.07 (r.286_287ins[286+1_286+144], p.(Ile97ValfsTer36))				0.51 (FL_WT)		PVS1 (0.49) + BP7_S (0.51)	PVS1_N/A (RNA)6	PM2 Supporting PP3 Supporting		2		VUS
V19	c.286+5G>C		0.30 (r.201_286del, p.(Cys68HisfsTer21)); 0.13 (r.286_287ins[286+1_286+144], p.(Ile97AspfsTer36))				0.57 (FL_WT)		PVS1 (0.43) + BP7_S (0.57)	PVS1_N/A (RNA)6	PM2 Supporting PP3 Supporting		2		VUS
V15	c.286G>C	p.Gly96Arg	0.30 (r.201_286del, p.(Cys68HisfsTer21)); 0.19 (r.286_287ins[286+1_286+144], p.(Gly96ArgfsTer37))				0.51 (FL_WT)		PVS1 (0.49) + BP7_S (0.51)	PVS1_N/A (RNA)6	PP3 Supporting PM2 Supporting PS1 Moderate		4		VUS
V21	c.287-10T>G						1.00 (FL_WT)		BP7_S (1.00)	BP7_S (RNA)	PM2 Supporting PP3 Supporting	PM2 Supporting PP3 Supporting BP7 Strong (RNA)	2	-2	VUS	Likely Benign
V20	c.287-12T>A						1.00 (FL_WT)		BP7_S (1.00)	BP7_S (RNA)	PM2 Supporting PP3 Supporting	PM2 Supporting PP3 Supporting BP7 Strong (RNA)	2	-2	VUS	Likely Benign
V58	c.287-1G>C		0.04 (r.201_423del, p.(Cys68IleTer2)); 0.86 (r.287_423del, p.(Ile97PhefsTer11)); 0.03 (r.287_411del, p.(Ile97SerfsTer15))	0.04 (r.287_322del, p.(Ile97_Gly108del))				0.03 (r.286_287ins[286+1_287-1], p.(Ile97GlufsTer36))²	PVS1 (0.93) + PVS1_S (0.04) + N/A (0.03)²	PVS1_Strong (RNA)	PVS1 Very Strong PS1 Supporting PM2 Supporting PS4 Moderate	PVS1 Strong (RNA) PS1 Strong PM2 Supporting PS4 Moderate	12	11	Pathogenic	Pathogenic
V26	c.287-1G>T		0.04 (r.201_423del, p.(Cys68IleTer2)); 0.64 (r.287_423del, p.(Ile97PhefsTer11)); 0.07 (r.287_411del, p.(Ile97SerfsTer15))	0.03 (r.287_334del, p.(Gly96_Leu111del)); 0.18 (r.287_322del, p.(Ile97_Gly108del))			0.01 (FL_WT)	0.04 (r.286_287ins[286+1_286+4323], p.(Ile97GlufsTer36))²	PVS1 (0.75) + PVS1_S (0.21) + BP7_S (0.01) + N/A (0.04)²	PVS1_Strong (RNA)3	PVS1 Very Strong PS1 Supporting PM2 Supporting	PVS1 Strong (RNA) PS1 Strong PM2 Supporting	10	9	Pathogenic	Likely Pathogenic
V3	c.287-2A>T		0.02 (r.201_423del, p.(Cys68IleTer2)); 0.98 (r.287_423del, p.(Ile97PhefsTer11))						PVS1 (1.00)	PVS1_Strong (RNA)	PVS1 Very Strong PS1 Supporting PM2 Supporting	PVS1 Strong (RNA) PS1 Strong PM2 Supporting	10	9	Pathogenic	Likely Pathogenic
V25	c.287-3C>G		0.03 (r.201_423del, p.(Cys68IleTer2)); 0.82 (r.287_423del, p.(Ile97PhefsTer11)); 0.01 (r.287_411del, p.(Ile97SerfsTer15))				0.14 (FL_WT)		PVS1 (0.86) + BP7_S (0.14)	PVS1_Moderate (RNA)	PM2 Supporting PP3 Supporting PS4 Moderate PS1 Moderate	PM2 Supporting PS4 Moderate PVS1 Moderate (RNA) PS1 Moderate	6	7	Likely Pathogenic	Likely Pathogenic
V24	c.287-5T>G		0.02 (r.201_423del, p.(Cys68IleTer2)); 0.04 (r.287_423del, p.(Ile97PhefsTer11))				0.94 (FL_WT)		PVS1 (0.06) + BP7_S (0.94)	BP7_S (RNA)	PM2 Supporting PP3 Supporting	PM2 Supporting PP3 Supporting BP7 Strong (RNA)	2	-2	VUS	Likely Benign
V23	c.287-6T>G		0.02 (r.287_423del, p.(Ile97PhefsTer11))				0.98 (FL_WT)		PVS1 (0.02) + BP7_S (0.98)	BP7_S (RNA)	PM2 Supporting PP3 Supporting	PM2 Supporting PP3 Supporting BP7 Strong (RNA)	2	-2	VUS	Likely Benign
V22	c.287-8T>G						1.00 (FL_WT)		BP7_S (1.00)	BP7_S (RNA)	PM2 Supporting PP3 Supporting	PM2 Supporting PP3 Supporting BP7 Strong (RNA)	2	-2	VUS	Likely Benign
V52	c.287G>T	p.Gly96Val					1.00 (FL_WT)		BP7_S (1.00)	BP7_S (RNA) not applicable7	PM2 Supporting PP3 Supporting		2		VUS
V5	c.300T>C	p.Ser100=					1.00 (FL_WT)		BP7_S (1.00)	BP7_S (RNA)	BS1 Strong BS2 Strong BP7 Supporting	BS1 Strong BS2 Strong BP7 Strong (RNA)	-9	-12	Benign	Benign
V27	c.365A>G	p.Asn122Ser					1.00 (FL_WT)		BP7_S (1.00)	BP7_S (RNA) not applicable7	PM2 Supporting PP3 Supporting		2		VUS
V28	c.372C>A	p.Val124=				0.97 (r.370_423del5, p.(Val124_Pro141del))⁵	0.03 (FL_WT)		BP7_S (0.03) + PVS1_N/A (0.97)⁵	PVS1_N/A5	PM2 Supporting PP3 Supporting		2		VUS
V29	c.398T>G	p.Met133Arg	1.00 (r.399_423del, p.(Met133ArgfsTer2))						PVS1 (1.00)	PVS1_Strong (RNA)	PM1 Supporting PM2 Supporting PP3 Supporting	PM2 Supporting PVS1 Strong (RNA)	3	5	VUS	VUS
V30	c.399G>C	p.Met133Ile					1.00 (FL_WT)		BP7_S (1.00)	BP7_S (RNA) not applicable7	PM2 Supporting PP3 Supporting		2		VUS
V31	c.400T>G	p.Tyr134Asp					1.00 (FL_WT)		BP7_S (1.00)	BP7_S (RNA) not applicable7	PM2 Supporting PP3 Supporting		2		VUS
V32	c.401A>T	p.Tyr134Phe					1.00 (FL_WT)		BP7_S (1.00)	BP7_S (RNA) not applicable7	PM2 Supporting PP3 Supporting		2		VUS
V33	c.402T>A	p.Tyr134Ter	1.00 (r.399_423del, p.(Tyr134IlefsTer1))						PVS1 (1.00)	PVS1_Strong (RNA)	PVS1 Very Strong PM2 Supporting	PVS1 Strong (RNA) PM2 Supporting	9	5	Likely Pathogenic	VUS
V34	c.403G>T	p.Val135Leu					1.00 (FL_WT)		BP7_S (1.00)	BP7_S (RNA) not applicable7	PM2 Supporting PP3 Supporting		2		VUS
V53	c.413A>G	p.Asp138Gly	0.15 (r.399_423del, p.(Tyr134IlefsTer1))			0.17 (r.370_423del5, p.(Val124_Pro141del))⁵	0.68 (FL_WT)		PVS1 (0.15) + BP7_S (0.68) + PVS1_N/A (0.17)⁵	PVS1_N/A5	PS2 Supporting PM2 Supporting PP3 Supporting		3		VUS
V42	c.423+156G>T		0.11 (r.423_424ins[423+161_423+288], p.(Asp142GluTer35))				0.89 (FL_WT)		PVS1 (0.11) + BP7_S (0.89)	BP7_S (RNA)4	PM2 Supporting PP3 Supporting	PM2 Supporting PP3 Supporting BP7 Strong (RNA)	2	-2	VUS	Likely Benign
V44	c.423+190A>C		0.01 (r.423_424ins[423+161_423+288], p.(Asp142GluTer35))				0.99 (FL_WT)		PVS1 (0.01) + BP7_S (0.99)	BP7_S (RNA)	PM2 Supporting PP3 Supporting	PM2 Supporting PP3 Supporting BP7 Strong (RNA)	2	-2	VUS	Likely Benign
V35	c.423+1G>T		0.73 (r.399_423del, p.(Tyr134IlefsTer1))			0.27 (r.370_423del5, p.(Val124_Pro141del))⁵			PVS1 (0.73) + PVS1_N/A (0.27)⁵	PVS1_N/A5	PVS1 Very Strong PS1 Supporting PM2 Supporting		10		Pathogenic
V45	c.423+294G>T		0.09 (r.423_424ins[423+161_423+288], p.(Asp142GluTer35))				0.91 (FL_WT)		PVS1 (0.09) + BP7_S (0.91)	BP7_S (RNA)	PM2 Supporting PP3 Supporting	PM2 Supporting PP3 Supporting BP7 Strong (RNA)	2	-2	VUS	Likely Benign
V46	c.423+296T>A		0.03 (r.423_424ins[423+161_423+293], p.(Asp142GluTer35))				0.97 (FL_WT)		PVS1 (0.03) + BP7_S (0.97)	BP7_S (RNA)	PM2 Supporting PP3 Supporting	PM2 Supporting PP3 Supporting BP7 Strong (RNA)	2	-2	VUS	Likely Benign
V36	c.423+2T>G		0.49 (r.399_423del, p.(Tyr134IlefsTer1))			0.51 (r.370_423del5, p.(Val124_Pro141del))⁵			PVS1 (0.49) + PVS1_N/A (0.51)⁵	PVS1_N/A5	PVS1 Very Strong PS1 Supporting PM2 Supporting		10		Pathogenic
V37	c.423+3G>T		0.63 (r.399_423del, p.(Tyr134IlefsTer1))			0.35 (r.370_423del5, p.(Val124_Pro141del))⁵	0.02 (FL_WT)		PVS1 (0.63) + BP7_S (0.02) + PVS1_N/A (0.35)⁵	PVS1_N/A5	PM2 Supporting PP3 Supporting		2		VUS
V38	c.423+4A>T		0.69 (r.399_423del, p.(Tyr134IlefsTer1))			0.31 (r.370_423del5, p.(Val124_Pro141del))⁵			PVS1 (0.69) + PVS1_N/A (0.31)⁵	PVS1_N/A5	PM2 Supporting PP3 Supporting		2		VUS
V39	c.423+5G>C		0.72 (r.399_423del, p.(Tyr134IlefsTer1))			0.28 (r.370_423del5, p.(Val124_Pro141del))⁵			PVS1 (0.72) + PVS1_N/A (0.28)⁵	PVS1_N/A5	PM2 Supporting PP3 Supporting PS1 Moderat		6		Likely Pathogenic
V40	c.423+6T>G		0.46 (r.399_423del, p.(Tyr134IlefsTer1))			0.53 (r.370_423del5, p.(Val124_Pro141del))⁵	0.02 (FL_WT)		PVS1 (0.46) + BP7_S (0.02) + PVS1_N/A (0.53)⁵	PVS1_N/A5	PM2 Supporting PP3 Supporting		2		VUS
V50	c.423C>G	p.Pro141=					1.00 (FL_WT)		BP7_S (1.00)	BP7_S (RNA)	PM2 Supporting PP3 Supporting	PM2 Supporting PP3 Supporting BP7 Strong (RNA)	2	-2	VUS	Likely Benign
V41	c.424-151T>G		0.02 (r.423_424ins[424-150_424-1], p.(Asp142IlefsTer18)); 0.03 (r.399_423del, p.(Tyr134IlefsTer1))			0.04 (r.370_423del5, p.(Val124_Pro141del))⁵	0.91 (FL_WT)		PVS1 (0.05) + BP7_S (0.91) + PVS1_N/A (0.04)⁵	BP7_S (RNA)	PM2 Supporting PP3 Supporting	PM2 Supporting PP3 Supporting BP7 Strong (RNA)	2	-2	VUS	Likely Benign
V57	c.424-1G>A							1.00 (r.424del, p.(Asp142IlefsTer1))	N/A (1.00)	N/A
V43	c.424-7A>G							0.95 (r.423_424ins[424-6_424-1], p.(Asp142_Leu143insProGln)); 0.05 (FL_WT)	N/A (1.00)	N/A

## Sheet: Footnotes
	Variants highlighted in grey were not further assessed, as they are located at minigene construct boundaries. Footnotes: 1Total intron 2 retention (r.200_201ins[200+1_201-1], p.(Cys68Ter)). 2Total intron 3 retention (r.286_287ins[286+1_287-1], p.(Ile97GlufsTer36)). 3PVS1_Strong (RNA) overall strength assigned due to overall high percentage splice disruption. 4BP7_S ratio rounded up. 5 Transcript …
