# Supplementary material for: Minigene-based characterization and classification of splice-associated variants in succinate dehydrogenase B
Source: Research Square preprint supplement (doi:10.21203/rs.3.rs-8661010/v1), 2026-02-24
Supplement: Supplementary file 3 [file aa66cfaa3e6e8edc1f702548.xlsx]

## Sheet: HEK293T (RNA-Seq)
Chromosome	first base of the intron (1-based)	last base of the intron (1-based)	strand (0: undefined, 1: +, 2: -)	intron motif: 0: non-canonical; 1: GT/AG, 2: CT/AC, 3: GC/AG, 4: CT/GC, 5: AT/AC, 6: GT/AT	0: unannotated, 1: annotated	number of uniquely mapping reads crossing the junction	number of multi-mapping reads crossing the junction	maximum spliced alignment overhang	splice junction	Reference	Ratio to E6-E7
NC_000001.11	44777790	44777999	1	1	1	3015	6	37					Exon
NC_000001.11	44776775	44777613	1	1	1	2982	2	37					1
NC_000001.11	153991224	153991565	1	1	1	2823	42	37					2
NC_000001.11	44776141	44776674	1	1	1	2610	3	37					3
NC_000001.11	153990803	153991114	1	1	1	2346	31	34					4
NC_000001.11	8868058	8870451	2	2	1	2325	0	37					5
NC_000001.11	44778130	44778575	1	1	1	2261	4	37					6
NC_000001.11	23694792	23695797	1	1	1	2175	0	37					7
NC_000001.11	92836393	92837455	1	1	1	2145	10	37					8
NC_000001.11	92840640	92841765	1	1	1	2142	3	37
NC_000001.11	92833459	92833544	1	1	1	2064	0	37
NC_000001.11	23692760	23693806	1	1	1	2016	0	37
NC_000001.11	92832118	92833388	1	1	1	1981	1	37
NC_000001.11	8867251	8867987	2	2	1	1946	0	37
NC_000001.11	92834914	92836189	1	1	1	1946	2	37
NC_000001.11	8865483	8866278	2	2	1	1926	0	37
NC_000001.11	23693914	23694659	1	1	1	1864	0	37
NC_000001.11	8863344	8863890	2	2	1	1823	0	37
NC_000001.11	92833661	92834778	1	1	1	1793	0	37
NC_000001.11	42697263	42700780	1	1	1	1788	33	37
NC_000001.11	42701047	42701980	1	1	1	1752	27	37
NC_000001.11	8861430	8862886	2	2	1	1602	4	37
NC_000001.11	8870511	8871890	2	2	1	1586	0	37
NC_000001.11	8862946	8863234	2	2	1	1541	0	37
NC_000001.11	8871987	8874823	2	2	1	1482	0	37
NC_000001.11	42696289	42696641	1	1	1	1465	2	37
NC_000001.11	92837634	92840550	1	1	1	1433	67	37
NC_000001.11	8874918	8878579	2	2	1	1431	0	37
NC_000001.11	42696945	42697179	1	1	1	1420	82	37
NC_000001.11	42693524	42696198	1	1	1	1359	7	37
NC_000001.11	8866502	8867116	2	2	1	1331	0	37
NC_000001.11	153991677	153992064	1	1	1	1321	19	37
NC_000001.11	8864093	8865284	2	2	1	1320	0	37
NC_000001.11	44775601	44776033	1	1	1	1188	2	37
NC_000001.11	26472628	26473482	1	1	1	1114	0	37
NC_000001.11	42683467	42693489	1	1	1	1067	4	35
NC_000001.11	6193055	6197651	2	2	1	1007	90	37
NC_000001.11	23695909	23696343	1	1	1	984	0	37
NC_000001.11	26473733	26474084	1	1	1	957	12	32
NC_000001.11	26473528	26473702	1	1	1	931	37	36
NC_000001.11	26474668	26475112	1	1	1	922	23	37
NC_000001.11	26474136	26474571	1	1	1	892	44	37
NC_000001.11	67420187	67424199	2	2	1	854	57	37
NC_000001.11	67426286	67429987	2	2	1	850	37	37
NC_000001.11	45511415	45514506	2	2	1	848	0	37
NC_000001.11	45514996	45515653	2	2	1	837	0	37
NC_000001.11	45515808	45518937	2	2	1	813	0	37
NC_000001.11	228097716	228097851	1	1	1	801	0	37
NC_000001.11	67413264	67415165	2	2	1	778	0	37
NC_000001.11	228097453	228097590	1	1	1	777	0	37
NC_000001.11	67425224	67426134	2	2	1	767	15	37
NC_000001.11	45514638	45514872	2	2	1	762	0	37
NC_000001.11	42682732	42683402	1	1	1	758	5	37
NC_000001.11	156317248	156317414	2	2	1	738	0	37
NC_000001.11	32228610	32228726	1	1	1	729	0	37
NC_000001.11	67424278	67424887	2	2	1	719	19	36
NC_000001.11	156312222	156317165	2	2	1	708	1	37
NC_000001.11	244855045	244855423	2	2	1	653	1	37
NC_000001.11	67415340	67420008	2	2	1	645	7	37
NC_000001.11	23691830	23692608	1	1	1	641	0	36
NC_000001.11	156334919	156335826	2	2	1	632	0	37
NC_000001.11	46310317	46316551	1	1	1	630	0	37
NC_000001.11	226383184	226385503	2	2	1	630	0	37
NC_000001.11	156317548	156318867	2	2	1	625	0	37
NC_000001.11	226386443	226388655	2	2	1	603	0	37
NC_000001.11	244854504	244854972	2	2	1	600	0	37
NC_000001.11	226392315	226402213	2	2	1	597	4	37
NC_000001.11	156334776	156334867	2	2	1	594	0	37
NC_000001.11	6197757	6199561	2	2	1	584	0	37
NC_000001.11	226370518	226374225	2	2	1	584	1	37
NC_000001.11	45519055	45521828	2	2	1	583	0	37
NC_000001.11	226381209	226383035	2	2	1	574	3	37
NC_000001.11	156311196	156312040	2	2	1	573	0	37
NC_000001.11	46309128	46310154	1	1	1	570	4	29
NC_000001.11	156309304	156310557	2	2	1	567	0	37
NC_000001.11	156319018	156320838	2	2	1	567	0	37
NC_000001.11	153665337	153665662	2	2	1	565	0	37
NC_000001.11	32226531	32228498	1	1	1	561	0	37
NC_000001.11	153663277	153664042	2	2	1	561	0	37
NC_000001.11	226365155	226365953	2	2	1	556	0	37
NC_000001.11	114724003	114725220	2	2	1	541	0	37
NC_000001.11	226377304	226379141	2	2	1	540	18	37
NC_000001.11	244856857	244857597	2	2	1	539	0	37
NC_000001.11	156333644	156334712	2	2	1	538	0	37
NC_000001.11	226390625	226392198	2	2	1	537	0	37
NC_000001.11	205723982	205727699	2	2	1	535	9	37
NC_000001.11	244855609	244855903	2	4	1	529	0	37
NC_000001.11	32228817	32229134	1	1	1	527	0	37
NC_000001.11	46303821	46309100	1	1	1	520	6	28
NC_000001.11	153664475	153665219	2	2	1	517	0	37
NC_000001.11	203865120	203869876	1	1	1	513	52	37
NC_000001.11	226363161	226363942	2	2	1	513	0	37
NC_000001.11	244856159	244856456	2	4	1	513	0	37
NC_000001.11	226366053	226367479	2	2	1	509	0	37
NC_000001.11	226388756	226390409	2	2	1	509	0	37
NC_000001.11	226368322	226370433	2	2	1	506	1	37
NC_000001.11	244859375	244860334	2	2	1	494	0	37
NC_000001.11	32231020	32231114	1	1	1	493	2	37
NC_000001.11	226380165	226381067	2	2	1	492	0	37
NC_000001.11	226374355	226377107	2	2	1	484	0	37
NC_000001.11	114736856	114737962	2	2	1	480	0	37
NC_000001.11	156321026	156324971	2	2	1	480	0	37
NC_000001.11	205719677	205720500	2	2	1	476	0	37
NC_000001.11	226362084	226363098	2	2	1	473	0	37
NC_000001.11	114732817	114733731	2	2	1	466	4	37
NC_000001.11	228097263	228097341	1	1	1	466	1	36
NC_000001.11	153668078	153668452	2	2	1	465	0	37
NC_000001.11	203862223	203863662	1	1	1	465	26	33
NC_000001.11	205720654	205723925	2	2	1	465	0	37
NC_000001.11	114727091	114730257	2	2	1	464	0	37
NC_000001.11	156325090	156333546	2	2	1	463	0	37
NC_000001.11	151400589	151400763	1	1	1	460	0	37
NC_000001.11	156335889	156338153	2	2	1	460	0	37
NC_000001.11	226364071	226365001	2	2	1	460	0	37
NC_000001.11	226402380	226407809	2	2	1	459	0	37
NC_000001.11	32226321	32226402	1	1	1	457	14	37
NC_000001.11	244857718	244858010	2	2	1	457	0	37
NC_000001.11	244858842	244859274	2	2	1	457	0	37
NC_000001.11	226379642	226379921	2	2	1	455	1	37
NC_000001.11	67424978	67425082	2	2	1	452	18	37
NC_000001.11	226379275	226379572	2	2	1	452	0	37
NC_000001.11	25901088	25901490	2	2	1	451	0	37
NC_000001.11	35187252	35187972	2	2	1	448	0	37
NC_000001.11	226367609	226368198	2	2	1	443	0	37
NC_000001.11	205718480	205719526	2	2	1	440	1	37
NC_000001.11	7977739	7984893	1	1	1	439	0	37
NC_000001.11	32224122	32224409	1	1	1	433	0	37
NC_000001.11	153662557	153662704	2	2	1	433	0	37
NC_000001.11	156743456	156743651	2	2	1	433	0	37
NC_000001.11	226385681	226386325	2	2	1	433	0	37
NC_000001.11	153665729	153667554	2	2	1	428	0	37
NC_000001.11	114718217	114718612	2	2	1	426	2	37
NC_000001.11	151401356	151401541	1	1	1	423	0	37
NC_000001.11	235122373	235128594	2	2	1	420	1	37
NC_000001.11	153667658	153667999	2	2	1	417	0	37
NC_000001.11	203861714	203862195	1	1	1	416	9	31
NC_000001.11	114720718	114723882	2	2	1	411	0	37
NC_000001.11	159919377	159919660	2	2	1	411	0	37
NC_000001.11	145926178	145926481	2	2	1	410	1	37
NC_000001.11	7970964	7977651	1	1	1	409	0	37
NC_000001.11	35189088	35189185	2	2	1	404	0	37
NC_000001.11	244856626	244856727	2	2	1	404	1	37
NC_000001.11	67424960	67425082	2	2	1	401	1	37
NC_000001.11	111449874	111454210	1	1	1	401	0	37
NC_000001.11	203863726	203865040	1	1	1	401	48	37
NC_000001.11	114725334	114726210	2	2	1	399	0	37
NC_000001.11	114738073	114739691	2	2	1	398	0	37
NC_000001.11	205727806	205729571	2	2	1	397	21	37
NC_000001.11	111449582	111449836	1	1	1	396	0	37
NC_000001.11	33013403	33014521	2	2	1	393	15	37
NC_000001.11	156744349	156745007	2	2	1	393	1	37
NC_000001.11	226361542	226361968	2	2	1	392	0	37
NC_000001.11	35188091	35189002	2	2	1	391	0	37
NC_000001.11	156310690	156310949	2	2	1	390	0	37
NC_000001.11	173485508	173486254	1	1	1	382	0	36
NC_000001.11	111454357	111456085	1	1	1	381	0	37
NC_000001.11	32224476	32226170	1	1	1	380	20	37
NC_000001.11	111459637	111460916	1	1	1	377	1	37
NC_000001.11	32229209	32230926	1	1	1	376	3	37
NC_000001.11	35187123	35187202	2	2	1	375	0	37
NC_000001.11	153662796	153663018	2	2	1	372	0	37
NC_000001.11	153668558	153669835	2	2	1	372	0	37
NC_000001.11	114719743	114720538	2	2	1	367	0	36
NC_000001.11	151400188	151400441	1	1	1	367	0	37
NC_000001.11	153664131	153664395	2	2	1	367	0	37
NC_000001.11	116401656	116403883	1	1	1	364	0	37
NC_000001.11	39028941	39034391	1	1	1	362	0	37
NC_000001.11	156743879	156744162	2	2	1	362	1	37
NC_000001.11	235119900	235122325	2	2	1	362	24	37
NC_000001.11	235112109	235113767	2	2	1	360	7	37
NC_000001.11	114726387	114726982	2	4	1	358	0	37
NC_000001.11	150627593	150629413	2	2	1	358	0	37
NC_000001.11	151400846	151401238	1	1	1	358	0	37
NC_000001.11	6186817	6192929	2	2	1	355	726	37
NC_000001.11	25901683	25903640	2	2	1	355	1	37
NC_000001.11	32222631	32224033	1	1	1	355	1	37
NC_000001.11	244858275	244858728	2	2	1	354	0	37
NC_000001.11	228082766	228097077	1	1	1	352	6	37
NC_000001.11	173486402	173487734	1	1	1	351	0	37
NC_000001.11	7969405	7970893	1	1	1	349	0	36
NC_000001.11	114734118	114734441	2	2	1	348	0	36
NC_000001.11	119726906	119727003	1	1	1	347	3	37
NC_000001.11	244862731	244863673	2	2	1	347	0	37
NC_000001.11	35609409	35631273	2	2	1	346	0	37
NC_000001.11	153669879	153670170	2	2	1	346	0	37
NC_000001.11	235113911	235119817	2	2	1	345	15	37
NC_000001.11	114730649	114732603	2	2	1	341	0	37
NC_000001.11	54205202	54205294	1	1	1	340	0	37
NC_000001.11	114734524	114736757	2	2	1	340	0	36
NC_000001.11	111456250	111456629	1	1	1	339	2	37
NC_000001.11	116396735	116397887	1	1	1	339	0	36
NC_000001.11	151401631	151401816	1	1	1	339	0	37
NC_000001.11	244862535	244862618	2	2	1	336	0	37
NC_000001.11	111456756	111459456	1	1	1	334	53	37
NC_000001.11	154978115	154978724	1	1	1	334	9	37
NC_000001.11	159918942	159919273	2	2	1	334	0	37
NC_000001.11	145926619	145926808	2	2	1	331	1	37
NC_000001.11	173481483	173485360	1	1	1	331	0	37
NC_000001.11	11056095	11056603	2	2	1	330	0	37
NC_000001.11	205729622	205749956	2	2	1	326	22	37
NC_000001.11	33014595	33021366	2	2	1	322	2	37
NC_000001.11	145925928	145926040	2	2	1	322	1	37
NC_000001.11	116401007	116401129	1	1	1	321	0	37
NC_000001.11	114733858	114733988	2	2	1	319	0	37
NC_000001.11	116401261	116401553	1	1	1	319	0	37
NC_000001.11	151399728	151399980	1	1	1	319	0	36
NC_000001.11	32335098	32335946	2	2	1	315	1	37
NC_000001.11	35189383	35190497	2	2	1	315	0	37
NC_000001.11	35636433	35641341	2	2	1	312	0	37
NC_000001.11	116398790	116398929	1	1	1	309	0	37
NC_000001.11	156745147	156745296	2	2	1	309	0	37
NC_000001.11	116389020	116389438	1	1	1	307	0	37
NC_000001.11	159919836	159920329	2	2	1	306	0	37
NC_000001.11	116392989	116393530	1	1	1	303	0	37
NC_000001.11	175008707	175009922	1	1	1	301	6	37
NC_000001.11	7965426	7969344	1	1	1	299	0	37
NC_000001.11	175007198	175008608	1	1	1	298	29	37
NC_000001.11	35603375	35605232	2	2	1	297	0	37
NC_000001.11	154157722	154170399	2	2	1	296	1	37
NC_000001.11	244860475	244862460	2	2	1	296	0	37
NC_000001.11	173477493	173481325	1	1	1	295	0	37
NC_000001.11	173866797	173866990	2	2	1	291	3	37
NC_000001.11	119723442	119726850	1	1	1	290	4	37
NC_000001.11	154172105	154172907	2	2	1	286	1	37
NC_000001.11	154170470	154170648	2	2	1	285	1	37
NC_000001.11	114739891	114749820	2	2	1	284	0	37
NC_000001.11	28201371	28203746	2	2	1	283	0	37
NC_000001.11	54210132	54212500	1	1	1	283	10	37
NC_000001.11	54205411	54209945	1	1	1	282	0	37
NC_000001.11	54200590	54205017	1	1	1	279	0	37
NC_000001.11	67424323	67424887	2	2	1	279	1	37
NC_000001.11	114730423	114730507	2	2	1	278	0	37
NC_000001.11	32780279	32781047	2	2	1	277	0	37
NC_000001.11	32672902	32679639	1	1	1	275	7	37
NC_000001.11	119737267	119740385	1	1	1	274	0	37
NC_000001.11	35184594	35187000	2	2	1	273	0	36
NC_000001.11	35631345	35636309	2	2	1	273	0	37
NC_000001.11	150294450	150308047	1	1	1	273	12	37
NC_000001.11	7962876	7965323	1	1	1	271	0	37
NC_000001.11	114750208	114757924	2	2	1	271	0	36
NC_000001.11	28203823	28205257	2	2	1	270	0	37
NC_000001.11	32782540	32786361	2	2	1	269	0	37
NC_000001.11	1790597	1793244	2	2	1	268	0	37
NC_000001.11	116390892	116392853	1	1	1	268	1	37
NC_000001.11	150622860	150625641	2	2	1	268	0	37
NC_000001.11	154170712	154172028	2	2	1	268	4	37
NC_000001.11	32031641	32033187	1	1	1	267	5	37
NC_000001.11	109402091	109409927	2	2	1	267	0	37
NC_000001.11	32331583	32331675	1	1	1	266	1	37
NC_000001.11	114718746	114719578	2	2	1	265	0	37
NC_000001.11	32292219	32302620	1	1	1	264	0	37
NC_000001.11	45605017	45606481	1	1	1	263	0	37
NC_000001.11	116393724	116395109	1	1	1	263	0	37
NC_000001.11	116398039	116398620	1	1	1	263	0	37
NC_000001.11	153663134	153663214	2	2	1	263	0	37
NC_000001.11	155169858	155172564	2	2	1	263	0	37
NC_000001.11	35190594	35190693	2	2	1	262	0	37
NC_000001.11	173866207	173866527	2	2	1	262	4	34
NC_000001.11	45615202	45615304	1	1	1	260	0	37
NC_000001.11	156745374	156751342	2	2	1	260	1	37
NC_000001.11	32781146	32782403	2	2	1	259	0	37
NC_000001.11	145926887	145927017	2	2	1	259	1	37
NC_000001.11	11056758	11058799	2	2	1	258	0	36
NC_000001.11	116384843	116387287	1	1	1	258	0	37
NC_000001.11	119721322	119723375	1	1	1	258	2	37
NC_000001.11	33024568	33036735	2	2	1	257	17	37
NC_000001.11	175000196	175004613	1	1	1	257	4	37
NC_000001.11	84501971	84506010	2	2	1	256	0	36
NC_000001.11	32811058	32817187	2	2	1	255	0	37
NC_000001.11	154172979	154173083	2	2	1	255	2	37
NC_000001.11	116389708	116390212	1	1	1	254	0	37
NC_000001.11	11058893	11059224	2	2	1	253	0	36
NC_000001.11	22086549	22086668	1	1	1	253	0	37
NC_000001.11	151264029	151264831	1	1	1	253	0	37
NC_000001.11	153975906	153976692	2	2	1	253	4	37
NC_000001.11	109412185	109413067	2	2	1	251	0	37
NC_000001.11	119735444	119737113	1	1	1	251	0	37
NC_000001.11	109413136	109415236	2	2	1	250	0	37
NC_000001.11	35605283	35609245	2	2	1	249	0	37
NC_000001.11	32669133	32669230	1	1	1	248	0	37
NC_000001.11	35190996	35191340	2	2	1	248	0	37
NC_000001.11	116403976	116404415	1	1	1	248	0	37
NC_000001.11	151264919	151265165	1	1	1	248	0	37
NC_000001.11	116395286	116396597	1	1	1	247	0	37
NC_000001.11	32302734	32316664	1	1	1	246	0	37
NC_000001.11	32657573	32668224	1	1	1	246	7	37
NC_000001.11	32776092	32779381	2	2	1	246	2	37
NC_000001.11	20652529	20652620	2	2	1	245	0	37
NC_000001.11	26941819	26942659	1	1	1	245	7	37
NC_000001.11	150625809	150627466	2	2	1	245	88	37
NC_000001.11	173866568	173866760	2	2	1	245	0	37
NC_000001.11	28536027	28536261	1	1	1	244	0	37
NC_000001.11	116384125	116384782	1	1	1	243	0	37
NC_000001.11	119727103	119734633	1	1	1	243	0	37
NC_000001.11	54216345	54218171	1	1	1	242	0	36
NC_000001.11	116388245	116388637	1	1	1	242	0	37
NC_000001.11	32786448	32786939	2	2	1	241	0	37
NC_000001.11	32030423	32031523	1	1	1	240	2	37
NC_000001.11	173865895	173866176	2	2	1	240	3	34
NC_000001.11	182384724	182385356	2	2	1	240	0	37
NC_000001.11	32038037	32038551	1	1	1	239	9	37
NC_000001.11	11055085	11055780	2	2	1	238	0	37
NC_000001.11	20656188	20660880	2	2	1	237	0	37
NC_000001.11	22086867	22091427	1	1	1	237	5	37
NC_000001.11	11054886	11054961	2	2	1	234	0	37
NC_000001.11	109411936	109412076	2	2	1	234	0	37
NC_000001.11	151266588	151267172	1	1	1	234	0	37
NC_000001.11	25903814	25904663	2	2	1	233	5	37
NC_000001.11	182883369	182883519	1	1	1	231	0	37
NC_000001.11	32038620	32039514	1	1	1	230	5	37
NC_000001.11	154173202	154176114	2	2	1	230	1	37
NC_000001.11	145927078	145927359	2	2	1	229	3	37
NC_000001.11	11055927	11056010	2	2	1	228	0	37
NC_000001.11	173864705	173865228	2	2	1	228	0	31
NC_000001.11	22081795	22086438	1	1	1	227	9	37
NC_000001.11	173865548	173865856	2	2	1	227	2	37
NC_000001.11	182878174	182879249	1	1	1	227	0	36
NC_000001.11	156018369	156020012	2	2	1	226	0	37
NC_000001.11	182388751	182391678	2	2	1	226	2	37
NC_000001.11	32037044	32037834	1	1	1	224	0	37
NC_000001.11	32652062	32657426	1	1	1	223	4	37
NC_000001.11	43360098	43360192	1	1	1	223	0	37
NC_000001.11	119734767	119735294	1	1	1	222	0	37
NC_000001.11	226062812	226064328	1	1	1	222	465	37
NC_000001.11	32332750	32333016	1	1	1	221	0	35
NC_000001.11	153974836	153975825	2	2	1	221	0	37
NC_000001.11	20655535	20655675	2	2	1	220	0	37
NC_000001.11	32791255	32797762	2	2	1	220	1	37
NC_000001.11	20654708	20655439	2	2	1	219	0	37
NC_000001.11	20655780	20656100	2	2	1	218	0	37
NC_000001.11	32033335	32036909	1	1	1	218	1	37
NC_000001.11	33010834	33013206	2	2	1	217	0	37
NC_000001.11	175004834	175006744	1	1	1	217	77	37
NC_000001.11	156015070	156018269	2	2	1	216	0	35
NC_000001.11	182385888	182386255	2	2	1	215	0	37
NC_000001.11	116390412	116390781	1	1	1	213	0	37
NC_000001.11	32332243	32332700	1	1	1	212	0	37
NC_000001.11	26941661	26941752	1	1	1	211	2	37
NC_000001.11	151266440	151266519	1	1	1	211	0	37
NC_000001.11	32039574	32042526	1	1	1	210	1	37
NC_000001.11	45602366	45604935	1	1	1	210	0	37
NC_000001.11	182860185	182866443	1	1	1	210	1	37
NC_000001.11	1804582	1806474	2	2	1	208	0	37
NC_000001.11	32222445	32222537	1	1	1	208	0	37
NC_000001.11	32330909	32331473	1	1	1	208	0	37
NC_000001.11	116387492	116388130	1	1	1	208	0	37
NC_000001.11	1806539	1815755	2	2	1	207	0	37
NC_000001.11	151266113	151266307	1	1	1	206	0	37
NC_000001.11	226064480	226065655	1	1	1	206	651	37
NC_000001.11	32316783	32324478	1	1	1	205	0	36
NC_000001.11	32672527	32672641	1	1	1	205	0	37
NC_000001.11	45617592	45618060	1	1	1	205	0	37
NC_000001.11	1815863	1817836	2	2	1	204	0	37
NC_000001.11	20653775	20654222	2	2	1	204	0	37
NC_000001.11	201957381	201957510	1	1	1	204	0	37
NC_000001.11	28535381	28535870	1	1	1	203	0	37
NC_000001.11	43976660	43976772	1	1	1	203	1	37
NC_000001.11	109229573	109230877	1	1	1	203	0	36
NC_000001.11	151262302	151263913	1	1	1	203	5	37
NC_000001.11	26945474	26945567	1	1	1	202	0	37
NC_000001.11	28205350	28208341	2	2	1	201	1	37
NC_000001.11	32668855	32668971	1	1	1	201	0	37
NC_000001.11	84498549	84501825	2	2	1	200	0	37
NC_000001.11	116388773	116388901	1	1	1	200	0	37
NC_000001.11	155169561	155169790	2	2	1	200	0	37
NC_000001.11	159920538	159925449	2	2	1	200	0	37
NC_000001.11	225778013	225783299	1	1	1	200	419	37
NC_000001.11	1405887	1406908	2	2	1	199	0	37
NC_000001.11	116399544	116400860	1	1	1	198	0	37
NC_000001.11	151265235	151265393	1	1	1	198	5	37
NC_000001.11	224183419	224189576	1	1	1	198	0	37
NC_000001.11	43170880	43171478	2	2	1	197	0	37
NC_000001.11	228145625	228146025	1	1	1	196	0	37
NC_000001.11	20652728	20652850	2	2	1	195	0	37
NC_000001.11	32331807	32332089	1	1	1	195	0	37
NC_000001.11	224360564	224365878	1	1	1	195	0	37
NC_000001.11	155172629	155172737	2	2	1	194	1	37
NC_000001.11	156011888	156014960	2	2	1	194	0	37
NC_000001.11	33021462	33021592	2	2	1	193	11	37
NC_000001.11	153670231	153670917	2	2	1	193	0	37
NC_000001.11	228146068	228146841	1	1	1	193	0	37
NC_000001.11	22078584	22081721	1	1	1	192	27	37
NC_000001.11	43167236	43168938	2	2	1	192	0	37
NC_000001.11	45616704	45617462	1	1	1	192	0	37
NC_000001.11	109410015	109411010	2	2	1	192	0	37
NC_000001.11	119712161	119721169	1	1	1	192	4	37
NC_000001.11	153976776	153976975	2	2	1	192	4	37
NC_000001.11	20660992	20661196	2	2	1	191	0	37
NC_000001.11	45614182	45614292	1	1	1	191	0	37
NC_000001.11	1817876	1825396	2	2	1	190	0	37
NC_000001.11	32651323	32651913	1	1	1	190	0	37
NC_000001.11	33021704	33024441	2	2	1	190	139	37
NC_000001.11	119740519	119741766	1	1	1	190	0	37
NC_000001.11	32014378	32030297	1	1	1	189	6	37
NC_000001.11	154974805	154977986	1	1	1	189	16	37
NC_000001.11	182881426	182881519	1	1	1	189	0	37
NC_000001.11	20652972	20653626	2	2	1	188	0	37
NC_000001.11	182386403	182387130	2	2	1	188	0	37
NC_000001.11	228147545	228147614	1	1	1	188	0	37
NC_000001.11	19597110	19622099	1	1	1	187	4	37
NC_000001.11	26945687	26946129	1	1	1	187	0	37
NC_000001.11	26921930	26924088	1	1	1	185	0	36
NC_000001.11	32810767	32810910	2	2	1	185	0	37
NC_000001.11	43166920	43167159	2	2	1	185	0	37
NC_000001.11	156009651	156011809	2	2	1	185	0	37
NC_000001.11	161100860	161102047	2	2	1	185	0	37
NC_000001.11	154207649	154212319	2	2	1	184	0	37
NC_000001.11	32797844	32806481	2	2	1	183	0	36
NC_000001.11	119741898	119742806	1	1	1	183	0	37
NC_000001.11	154275484	154275615	1	1	1	183	0	37
NC_000001.11	175006842	175007097	1	1	1	183	4	37
NC_000001.11	173864305	173864483	2	2	1	182	0	26
NC_000001.11	182884814	182887082	1	1	1	182	0	37
NC_000001.11	1787054	1787321	2	2	1	181	0	37
NC_000001.11	20654372	20654613	2	2	1	181	0	37
NC_000001.11	28536382	28536746	1	1	1	181	0	36
NC_000001.11	36456379	36457922	2	2	1	181	0	36
NC_000001.11	154176249	154182987	2	2	1	181	2	37
NC_000001.11	173864507	173864674	2	2	1	181	0	26
NC_000001.11	31908961	31910037	2	2	1	179	6	37
NC_000001.11	32324554	32326938	1	1	1	179	0	37
NC_000001.11	45615472	45616336	1	1	1	179	0	37
NC_000001.11	26924167	26941456	1	1	1	178	1	37
NC_000001.11	26943066	26945389	1	1	1	178	1	36
NC_000001.11	1402257	1405808	2	2	1	177	0	36
NC_000001.11	45616394	45616625	1	1	1	177	0	36
NC_000001.11	28536900	28537831	1	1	1	175	0	37
NC_000001.11	31911827	31915894	2	2	1	175	1	37
NC_000001.11	54212659	54216140	1	1	1	175	0	37
NC_000001.11	32327678	32329067	1	1	1	174	0	37
NC_000001.11	32330687	32330767	1	1	1	174	1	37
NC_000001.11	111443395	111443866	2	2	1	174	0	37
NC_000001.11	151983325	151986098	2	2	1	174	0	37
NC_000001.11	224365992	224371282	1	1	1	174	0	37
NC_000001.11	1793312	1804418	2	2	1	173	0	37
NC_000001.11	19622148	19623473	1	1	1	173	1	37
NC_000001.11	27907042	27907180	2	2	1	173	0	37
NC_000001.11	32806612	32810590	2	2	1	173	0	37
NC_000001.11	43976380	43976589	1	1	1	173	0	37
NC_000001.11	53235636	53238360	2	2	1	173	2	36
NC_000001.11	228147700	228148370	1	1	1	173	0	37
NC_000001.11	116373524	116384013	1	1	1	172	0	37
NC_000001.11	153977014	153977169	2	2	1	172	0	37
NC_000001.11	53227145	53228871	2	2	1	171	1	37
NC_000001.11	109411114	109411876	2	2	1	171	0	36
NC_000001.11	116399085	116399419	1	1	1	171	0	37
NC_000001.11	154212625	154213892	2	2	1	171	0	37
NC_000001.11	11018874	11020428	1	1	1	170	0	37
NC_000001.11	39026399	39028722	1	1	1	170	0	37
NC_000001.11	10404280	10408070	1	1	1	169	0	37
NC_000001.11	182874955	182876049	1	1	1	169	0	37
NC_000001.11	28535147	28535257	1	1	1	168	0	37
NC_000001.11	86868103	86880661	2	2	1	168	0	37
NC_000001.11	109415364	109421859	2	2	1	168	0	37
NC_000001.11	111441390	111442024	2	2	1	168	0	37
NC_000001.11	182387293	182388571	2	2	1	168	0	37
NC_000001.11	173864076	173864256	2	2	1	167	1	37
NC_000001.11	225404527	225404625	2	2	1	167	0	37
NC_000001.11	43164806	43166825	2	2	1	166	0	37
NC_000001.11	111442094	111442652	2	2	1	166	0	37
NC_000001.11	154275261	154275392	1	1	1	166	0	37
NC_000001.11	183633155	183635516	2	6	1	166	0	36
NC_000001.11	27892248	27894011	2	2	1	165	0	36
NC_000001.11	32668399	32668738	1	1	1	165	0	37
NC_000001.11	43976174	43976301	1	1	1	165	0	37
NC_000001.11	43977217	43977980	1	1	1	165	0	37
NC_000001.11	70244816	70246817	1	1	1	165	0	37
NC_000001.11	109237374	109237730	1	1	1	165	0	37
NC_000001.11	154212379	154212457	2	2	1	165	0	37
NC_000001.11	161210711	161212350	1	1	1	165	0	37
NC_000001.11	201957575	201963615	1	1	1	165	0	36
NC_000001.11	26942777	26942870	1	1	1	164	3	37
NC_000001.11	32669564	32672449	1	1	1	164	10	36
NC_000001.11	86863606	86868052	2	2	1	164	2	37
NC_000001.11	182842678	182843293	1	1	1	164	0	37
NC_000001.11	182854179	182856531	1	1	1	164	1	37
NC_000001.11	1542168	1543868	2	2	1	163	0	37
NC_000001.11	53233653	53235576	2	2	1	163	0	37
NC_000001.11	155319929	155320408	1	1	1	163	0	37
NC_000001.11	182385557	182385759	2	2	1	163	0	37
NC_000001.11	10403137	10404160	1	1	1	162	0	37
NC_000001.11	109228433	109229413	1	1	1	162	0	37
NC_000001.11	1787438	1789052	2	2	1	161	0	37
NC_000001.11	43171652	43171885	2	2	1	161	0	37
NC_000001.11	165728122	165743166	2	2	1	161	5	37
NC_000001.11	11017008	11018732	1	1	1	160	0	37
NC_000001.11	22052743	22078428	1	1	1	160	2	37
NC_000001.11	43359822	43359968	1	1	1	160	0	37
NC_000001.11	45591271	45602254	1	1	1	160	0	37
NC_000001.11	109421927	109426301	2	2	1	160	0	37
NC_000001.11	165743312	165752101	2	2	1	160	0	37
NC_000001.11	71072256	71072471	2	2	1	159	0	37
NC_000001.11	109236549	109237243	1	1	1	159	1	37
NC_000001.11	151254809	151262160	1	1	1	159	0	37
NC_000001.11	182879411	182880496	1	1	1	159	0	35
NC_000001.11	182880609	182881263	1	1	1	159	0	36
NC_000001.11	31910113	31911695	2	2	1	158	2	37
NC_000001.11	112654672	112659021	1	1	1	158	0	37
NC_000001.11	150231927	150235732	2	2	1	158	0	37
NC_000001.11	201963745	201965432	1	1	1	158	0	37
NC_000001.11	43362313	43362950	1	1	1	157	0	37
NC_000001.11	183630638	183633081	2	2	1	157	0	36
NC_000001.11	10408141	10411417	1	3	1	156	0	37
NC_000001.11	43164494	43164642	2	2	1	156	0	37
NC_000001.11	45614367	45615012	1	1	1	156	0	37
NC_000001.11	155310206	155312254	1	1	1	156	0	37
NC_000001.11	182876904	182878020	1	1	1	156	0	37
NC_000001.11	212444443	212445829	1	1	1	156	0	36
NC_000001.11	228146939	228147405	1	1	1	156	0	37
NC_000001.11	27907283	27914062	2	2	1	155	0	37
NC_000001.11	28531991	28532170	1	1	1	155	0	37
NC_000001.11	155318754	155318855	1	1	1	155	0	37
NC_000001.11	956216	956893	2	2	1	154	0	37
NC_000001.11	43975108	43975799	1	1	1	154	0	35
NC_000001.11	11020600	11022123	1	1	1	153	0	37
NC_000001.11	42659252	42659521	1	1	1	153	0	29
NC_000001.11	155318022	155318168	1	1	1	153	0	37
NC_000001.11	182876264	182876446	1	1	1	153	0	37
NC_000001.11	32787076	32791161	2	2	1	152	0	37
NC_000001.11	43975849	43976089	1	1	1	152	0	37
NC_000001.11	112667146	112669542	1	1	1	152	0	36
NC_000001.11	155318929	155319610	1	1	1	152	0	37
NC_000001.11	224371424	224375794	1	1	1	152	1	36
NC_000001.11	37987837	37989547	2	2	1	151	0	37
NC_000001.11	77960264	77960343	2	2	1	151	0	35
NC_000001.11	182872494	182874853	1	1	1	151	0	37
NC_000001.11	225508018	225511810	2	2	1	151	0	37
NC_000001.11	71072549	71076794	2	2	1	150	0	37
NC_000001.11	86880726	86903280	2	2	1	150	0	36
NC_000001.11	11059346	11059776	2	2	1	149	0	37
NC_000001.11	32329161	32330577	1	1	1	149	0	37
NC_000001.11	32779524	32780084	2	2	1	149	0	37
NC_000001.11	40984992	40987371	1	1	1	149	0	37
NC_000001.11	149926919	149927165	2	2	1	149	0	37
NC_000001.11	161102376	161117951	2	2	1	149	0	37
NC_000001.11	161210189	161210303	1	1	1	149	0	36
NC_000001.11	182876542	182876829	1	1	1	149	0	37
NC_000001.11	951239	951999	2	2	1	148	1	35
NC_000001.11	19385627	19419660	2	2	1	148	0	37
NC_000001.11	36457982	36460691	2	2	1	148	0	36
NC_000001.11	71076878	71078456	2	2	1	148	0	37
NC_000001.11	225920621	225921207	2	2	1	148	0	37
NC_000001.11	1373903	1373999	2	2	1	147	0	37
NC_000001.11	1407020	1407130	2	2	1	147	0	37
NC_000001.11	150223241	150226607	2	2	1	147	2	37
NC_000001.11	945147	945517	2	2	1	146	0	37
NC_000001.11	19419751	19485435	2	2	1	146	0	37
NC_000001.11	27894107	27894289	2	2	1	146	1	36
NC_000001.11	945654	946172	2	2	1	145	0	37
NC_000001.11	32327078	32327535	1	1	1	145	0	37
NC_000001.11	42658909	42659227	1	1	1	145	0	25
NC_000001.11	45613249	45614095	1	1	1	145	1	36
NC_000001.11	112653662	112654464	1	1	1	145	0	37
NC_000001.11	154213947	154214456	2	2	1	145	0	37
NC_000001.11	161209932	161210110	1	1	1	145	0	35
NC_000001.11	225411441	225412453	2	2	1	145	0	37
NC_000001.11	228107870	228108234	2	2	1	145	0	37
NC_000001.11	1789270	1790394	2	2	1	144	0	37
NC_000001.11	39026403	39028722	1	1	1	144	0	37
NC_000001.11	40069875	40070158	1	1	1	144	0	37
NC_000001.11	43360594	43360732	1	1	1	144	0	37
NC_000001.11	112659780	112667073	1	1	1	144	0	37
NC_000001.11	182866586	182866960	1	1	1	144	1	37
NC_000001.11	225419799	225422076	2	2	1	144	0	37
NC_000001.11	226065810	226071350	1	1	1	144	749	37
NC_000001.11	110404037	110406317	2	2	1	143	0	37
NC_000001.11	150293899	150294334	1	1	1	143	0	37
NC_000001.11	182856579	182858103	1	1	1	143	1	37
NC_000001.11	225498405	225500991	2	2	1	143	1	37
NC_000001.11	225783369	225789239	1	1	1	143	343	37
NC_000001.11	10419540	10419629	1	1	1	142	0	37
NC_000001.11	27897708	27906927	2	2	1	142	0	37
NC_000001.11	37969465	37969570	2	2	1	142	0	36
NC_000001.11	53228955	53233541	2	2	1	142	0	37
NC_000001.11	70239521	70244683	1	1	1	142	0	37
NC_000001.11	77964748	77964869	2	2	1	142	0	37
NC_000001.11	161102172	161102286	2	2	1	142	0	37
NC_000001.11	70250048	70250364	1	1	1	141	0	37
NC_000001.11	182883636	182884612	1	1	1	141	0	37
NC_000001.11	39561123	39561684	2	2	1	140	0	37
NC_000001.11	155732034	155736945	1	1	1	140	1	37
NC_000001.11	165752170	165754227	2	2	1	140	0	37
NC_000001.11	202333094	202333236	2	2	1	140	0	37
NC_000001.11	1545003	1564772	2	2	1	139	0	37
NC_000001.11	10400573	10403070	1	1	1	139	0	37
NC_000001.11	23972013	23974973	2	2	1	139	0	37
NC_000001.11	32669358	32669485	1	1	1	139	0	37
NC_000001.11	37989596	37989869	2	2	1	139	0	37
NC_000001.11	43359639	43359724	1	1	1	139	0	36
NC_000001.11	43361246	43362194	1	1	1	139	0	37
NC_000001.11	77962931	77963573	2	4	1	139	0	37
NC_000001.11	109214129	109223977	1	1	1	139	0	37
NC_000001.11	109224049	109228351	1	1	1	139	0	37
NC_000001.11	154219938	154220341	2	2	1	139	0	36
NC_000001.11	156233729	156236287	1	1	1	139	0	37
NC_000001.11	156797342	156800373	1	1	1	139	0	37
NC_000001.11	161210390	161210590	1	1	1	139	0	37
NC_000001.11	161356841	161362328	1	1	1	139	0	37
NC_000001.11	201965544	201969468	1	1	1	139	0	37
NC_000001.11	220020222	220022346	2	2	1	139	0	36
NC_000001.11	220145654	220147492	1	1	1	139	0	37
NC_000001.11	224356994	224360494	1	1	1	139	0	36
NC_000001.11	40987473	40988593	1	1	1	138	0	37
NC_000001.11	150220762	150223185	2	2	1	138	2	37
NC_000001.11	156020168	156020887	2	2	1	138	0	37
NC_000001.11	220110938	220114313	1	1	1	138	0	37
NC_000001.11	28508161	28508829	1	1	1	137	0	37
NC_000001.11	37984261	37984706	2	2	1	137	0	37
NC_000001.11	111444125	111447094	2	2	1	137	0	37
NC_000001.11	182853419	182854029	1	1	1	137	1	36
NC_000001.11	39568940	39569594	2	2	1	136	0	36
NC_000001.11	161154121	161156949	1	1	1	136	0	36
NC_000001.11	165754275	165759524	2	2	1	136	0	36
NC_000001.11	224190320	224192331	1	1	1	136	0	37
NC_000001.11	946287	946401	2	2	1	135	2	37
NC_000001.11	31915988	31918969	2	2	1	135	0	37
NC_000001.11	41007546	41008658	1	1	1	135	0	37
NC_000001.11	43359397	43359489	1	1	1	135	0	37
NC_000001.11	70246908	70249951	1	1	1	135	0	37
NC_000001.11	71070997	71072120	2	2	1	135	0	37
NC_000001.11	77960496	77962769	2	2	1	135	0	37
NC_000001.11	150226796	150229071	2	2	1	135	0	37
NC_000001.11	182858241	182858550	1	1	1	135	0	37
NC_000001.11	182881648	182883138	1	1	1	135	0	37
NC_000001.11	202331961	202333009	2	2	1	135	0	37
NC_000001.11	219969123	219972068	2	2	1	135	0	37
NC_000001.11	32672700	32672790	1	1	1	134	1	37
NC_000001.11	36455926	36456186	2	2	1	134	0	37
NC_000001.11	165905970	165907683	1	1	1	134	0	37
NC_000001.11	225403464	225404403	2	2	1	134	0	36
NC_000001.11	234373679	234374229	1	1	1	134	1	37
NC_000001.11	10417118	10417375	1	1	1	133	0	37
NC_000001.11	45584206	45591222	1	1	1	133	0	37
NC_000001.11	77964163	77964253	2	2	1	133	0	37
NC_000001.11	155717129	155721516	1	1	1	133	0	36
NC_000001.11	173867044	173867959	2	2	1	133	4	22
NC_000001.11	182839457	182842544	1	1	1	133	0	37
NC_000001.11	28532351	28535049	1	1	1	132	0	37
NC_000001.11	36463851	36464145	2	2	1	132	0	37
NC_000001.11	220114475	220125236	1	1	1	132	0	37
NC_000001.11	220125340	220126749	1	1	1	132	0	36
NC_000001.11	225418181	225419262	2	2	1	132	0	37
NC_000001.11	225419453	225419714	2	2	1	132	0	37
NC_000001.11	29154911	29159373	2	2	1	131	0	37
NC_000001.11	31269241	31271378	2	2	1	131	0	37
NC_000001.11	36460777	36461263	2	2	1	131	0	37
NC_000001.11	37976954	37978719	2	2	1	131	0	36
NC_000001.11	75791338	75791460	1	1	1	131	0	37
NC_000001.11	154259031	154259947	1	1	1	131	0	37
NC_000001.11	154275002	154275153	1	1	1	131	0	36
NC_000001.11	202948421	202950929	2	2	1	131	0	36
NC_000001.11	219979616	219980084	2	2	1	131	0	36
NC_000001.11	225511860	225512656	2	2	1	131	0	37
NC_000001.11	1543988	1544862	2	2	1	130	0	37
NC_000001.11	6318579	6327298	2	2	1	130	0	37
NC_000001.11	28738339	28742402	1	1	1	130	0	37
NC_000001.11	37958264	37960119	2	2	1	130	0	36
NC_000001.11	70237553	70239438	1	1	1	130	0	37
NC_000001.11	111442762	111443322	2	2	1	130	0	37
NC_000001.11	154257259	154257345	1	1	1	130	0	37
NC_000001.11	161209596	161209856	1	1	1	130	2	37
NC_000001.11	165890364	165891225	1	1	1	130	0	37
NC_000001.11	201955553	201957280	1	1	1	130	0	37
NC_000001.11	10411553	10413061	1	1	1	129	1	37
NC_000001.11	10413252	10416986	1	1	1	129	0	37
NC_000001.11	28529940	28531802	1	1	1	129	0	37
NC_000001.11	45606592	45613168	1	1	1	129	0	37
NC_000001.11	150967878	150968082	2	2	1	129	0	37
NC_000001.11	154237137	154241512	1	1	1	129	0	37
NC_000001.11	155729123	155729207	1	1	1	129	1	37
NC_000001.11	156794809	156797275	1	1	1	129	0	37
NC_000001.11	23057566	23059072	1	1	1	128	0	37
NC_000001.11	27914170	27914433	2	2	1	128	0	37
NC_000001.11	31633315	31635221	2	2	1	128	0	35
NC_000001.11	43360390	43360498	1	1	1	128	0	37
NC_000001.11	75732923	75733527	1	1	1	128	0	37
NC_000001.11	94899518	94901668	2	2	1	128	0	37
NC_000001.11	112649470	112653597	1	1	1	128	0	37
NC_000001.11	161157018	161157253	1	1	1	128	0	37
NC_000001.11	165896333	165903181	1	1	1	128	0	37
NC_000001.11	182843435	182852232	1	1	1	128	0	37
NC_000001.11	219972148	219973237	2	2	1	128	0	37
NC_000001.11	10417510	10418825	1	1	1	127	0	37
NC_000001.11	111443922	111444053	2	2	1	127	0	36
NC_000001.11	151762156	151762375	2	2	1	127	1	36
NC_000001.11	154273599	154273773	1	1	1	127	0	37
NC_000001.11	182859118	182859992	1	1	1	127	0	37
NC_000001.11	225530639	225554905	2	2	1	127	0	37
NC_000001.11	1374446	1374704	2	2	1	126	0	37
NC_000001.11	23059168	23068538	1	1	1	126	0	37
NC_000001.11	54854235	54865302	2	2	1	126	0	37
NC_000001.11	71078709	71080939	2	2	1	126	0	35
NC_000001.11	119743045	119743885	1	1	1	126	0	37
NC_000001.11	155312396	155317940	1	1	1	126	0	37
NC_000001.11	11013966	11016843	1	1	1	125	0	37
NC_000001.11	23068682	23069060	1	1	1	125	0	37
NC_000001.11	150967485	150967663	2	2	1	125	0	36
NC_000001.11	154254090	154254835	1	1	1	125	0	37
NC_000001.11	225501071	225507950	2	2	1	125	2	37
NC_000001.11	228106919	228107667	2	2	1	125	0	37
NC_000001.11	36462164	36463805	2	2	1	124	1	37
NC_000001.11	41008715	41008793	1	1	1	124	0	37
NC_000001.11	42666588	42667350	1	1	1	124	1	37
NC_000001.11	154260030	154260891	1	1	1	124	0	37
NC_000001.11	155319689	155319793	1	1	1	124	0	36
NC_000001.11	155729367	155731355	1	1	1	124	1	37
NC_000001.11	957026	957098	2	2	1	123	0	37
NC_000001.11	19623584	19626386	1	1	1	123	1	37
NC_000001.11	25356854	25360659	1	1	1	123	0	36
NC_000001.11	27894398	27897004	2	2	1	123	1	37
NC_000001.11	41006095	41007448	1	1	1	123	0	37
NC_000001.11	54883774	54886888	2	2	1	123	1	37
NC_000001.11	161314426	161323613	1	1	1	123	2	34
NC_000001.11	225406833	225410290	2	2	1	123	0	35
NC_000001.11	225922384	225923700	2	2	1	123	0	37
NC_000001.11	231561256	231564527	1	1	1	123	0	37
NC_000001.11	25904739	25906388	2	2	1	122	10	29
NC_000001.11	27897122	27897632	2	2	1	122	0	37
NC_000001.11	35191530	35192221	2	2	1	122	0	37
NC_000001.11	42658513	42658843	1	1	1	122	0	36
NC_000001.11	43169029	43170755	2	2	1	122	0	36
NC_000001.11	70250504	70250607	1	1	1	122	0	37
NC_000001.11	219978720	219979417	2	2	1	122	0	37
NC_000001.11	220100650	220102128	1	1	1	122	0	37
NC_000001.11	225410417	225411336	2	2	1	122	0	37
NC_000001.11	31281497	31289253	2	2	1	121	0	37
NC_000001.11	43976825	43977025	1	1	1	121	0	36
NC_000001.11	54043526	54045691	2	2	1	121	0	37
NC_000001.11	77955330	77956571	2	2	1	121	0	37
NC_000001.11	77963716	77964061	2	2	1	121	0	37
NC_000001.11	114575752	114576687	2	2	1	121	0	37
NC_000001.11	165759585	165768191	2	2	1	121	0	37
NC_000001.11	182858895	182859039	1	1	1	121	0	37
NC_000001.11	220139140	220140182	1	1	1	121	0	37
NC_000001.11	39567847	39568801	2	2	1	120	0	37
NC_000001.11	110401584	110403918	2	2	1	120	0	37
NC_000001.11	220005361	220006105	2	2	1	120	0	37
NC_000001.11	225512715	225512870	2	2	1	120	0	37
NC_000001.11	25338457	25340473	1	1	1	119	0	37
NC_000001.11	155725491	155725926	1	1	1	119	1	37
NC_000001.11	161157694	161158120	1	1	1	119	0	35
NC_000001.11	219997343	220001137	2	2	1	119	0	37
NC_000001.11	37984780	37987572	2	2	1	118	0	36
NC_000001.11	109231022	109231630	1	1	1	118	1	37
NC_000001.11	112647274	112649417	1	1	1	118	0	36
NC_000001.11	112669606	112669991	1	1	1	118	0	36
NC_000001.11	150229238	150230570	2	2	1	118	0	37
NC_000001.11	193051818	193059184	2	2	1	118	0	37
NC_000001.11	202335059	202335645	2	2	1	118	0	37
NC_000001.11	231542612	231561127	1	1	1	118	2	36
NC_000001.11	19339618	19344357	2	2	1	117	2	37
NC_000001.11	77964969	77965068	2	2	1	117	0	37
NC_000001.11	150267203	150267355	2	2	1	117	0	37
NC_000001.11	154214575	154219835	2	2	1	117	0	37
NC_000001.11	155737064	155738156	1	1	1	117	0	37
NC_000001.11	220019080	220019987	2	2	1	117	0	37
NC_000001.11	220103563	220105890	1	1	1	117	2	36
NC_000001.11	957274	958928	2	2	1	116	0	37
NC_000001.11	19254841	19255947	1	1	1	116	0	37
NC_000001.11	23975078	23978712	2	6	1	116	0	37
NC_000001.11	26170184	26170417	1	1	1	116	0	37
NC_000001.11	37969736	37976883	2	2	1	116	0	36
NC_000001.11	75792307	75794083	1	1	1	116	0	37
NC_000001.11	77948775	77949154	2	2	1	116	0	37
NC_000001.11	94898084	94899370	2	2	1	116	2	37
NC_000001.11	150967715	150967819	2	2	1	116	0	37
NC_000001.11	155731416	155731943	1	1	1	116	0	36
NC_000001.11	31267933	31269157	2	2	1	115	0	37
NC_000001.11	31289420	31291912	2	2	1	115	0	37
NC_000001.11	42660905	42664862	1	1	1	115	0	37
NC_000001.11	110406380	110407585	2	2	1	115	0	37
NC_000001.11	114570073	114570699	2	2	1	115	0	37
NC_000001.11	154550470	154550937	2	2	1	115	0	37
NC_000001.11	156236484	156239547	1	1	1	115	4	37
NC_000001.11	225497813	225498346	2	2	1	115	2	37
NC_000001.11	23079668	23081445	1	1	1	114	0	36
NC_000001.11	40074184	40076841	2	2	1	114	1	37
NC_000001.11	41003177	41006050	1	1	1	114	0	36
NC_000001.11	41009590	41010160	1	1	1	114	0	37
NC_000001.11	43171970	43172052	2	2	1	114	0	37
NC_000001.11	75787605	75789158	1	1	1	114	0	36
NC_000001.11	150230694	150231776	2	2	1	114	0	37
NC_000001.11	151246966	151247862	1	1	1	114	0	36
NC_000001.11	154241566	154243216	1	1	1	114	0	37
NC_000001.11	161157318	161157616	1	1	1	114	0	36
NC_000001.11	182858641	182858732	1	1	1	114	0	37
NC_000001.11	952601	953174	2	2	1	113	1	37
NC_000001.11	37981812	37984168	2	2	1	113	0	37
NC_000001.11	37987679	37987783	2	2	1	113	0	37
NC_000001.11	40070980	40071449	1	1	1	113	0	37
NC_000001.11	70221840	70228421	1	1	1	113	0	36
NC_000001.11	94901786	94902120	2	2	1	113	0	37
NC_000001.11	109236107	109236390	1	1	1	113	2	37
NC_000001.11	154234760	154235195	1	1	1	113	1	37
NC_000001.11	161203544	161206406	1	1	1	113	0	37
NC_000001.11	165654352	165655367	1	1	1	113	0	37
NC_000001.11	220136912	220137917	1	1	1	113	0	37
NC_000001.11	220140290	220141802	1	1	1	113	0	37
NC_000001.11	228148457	228148664	1	1	1	113	0	37
NC_000001.11	10469339	10472322	2	2	1	112	0	36
NC_000001.11	23971627	23971849	2	2	1	112	0	37
NC_000001.11	40070513	40070835	1	1	1	112	0	37
NC_000001.11	40988711	40991164	1	1	1	112	0	37
NC_000001.11	63453975	63454379	2	2	1	112	0	37
NC_000001.11	150266657	150267074	2	2	1	112	0	37
NC_000001.11	219973399	219978545	2	2	1	112	0	37
NC_000001.11	220001256	220005247	2	2	1	112	2	37
NC_000001.11	225412646	225415277	2	2	1	112	0	37
NC_000001.11	28737148	28737657	1	1	1	111	0	25
NC_000001.11	37960176	37968043	2	2	1	111	0	37
NC_000001.11	77949301	77955254	2	2	1	111	0	37
NC_000001.11	109231787	109235209	1	1	1	111	1	36
NC_000001.11	154249438	154251040	1	1	1	111	0	37
NC_000001.11	182867044	182872336	1	1	1	111	0	37
NC_000001.11	220102778	220103446	1	1	1	111	2	37
NC_000001.11	948604	951126	2	2	1	110	0	37
NC_000001.11	7961736	7962762	1	1	1	110	0	37
NC_000001.11	54871614	54875092	2	2	1	110	0	37
NC_000001.11	62447512	62448464	1	1	1	110	0	37
NC_000001.11	62448667	62450245	1	1	1	110	0	37
NC_000001.11	94903525	94926837	2	2	1	110	0	36
NC_000001.11	154251654	154253899	1	1	1	110	0	37
NC_000001.11	220007339	220010945	2	2	1	110	0	37
NC_000001.11	220102278	220102362	1	1	1	110	0	37
NC_000001.11	29159487	29160374	2	2	1	109	0	37
NC_000001.11	70232378	70234695	1	1	1	109	0	37
NC_000001.11	154243303	154246203	1	3	1	109	0	37
NC_000001.11	156737535	156737645	2	2	1	109	0	37
NC_000001.11	156737777	156738030	2	4	1	109	0	36
NC_000001.11	161323671	161328395	1	1	1	109	0	37
NC_000001.11	220006314	220007201	2	2	1	109	0	36
NC_000001.11	1825500	1839189	2	2	1	108	1	37
NC_000001.11	19256052	19257063	1	1	1	108	0	37
NC_000001.11	19257146	19257453	1	1	1	108	0	37
NC_000001.11	23055162	23055931	1	1	1	108	0	37
NC_000001.11	31261633	31267870	2	2	1	108	0	37
NC_000001.11	31271500	31281373	2	2	1	108	0	37
NC_000001.11	54865447	54871349	2	2	1	108	0	37
NC_000001.11	62445430	62447340	1	1	1	108	0	35
NC_000001.11	149926043	149926375	2	2	1	108	0	37
NC_000001.11	150966630	150966755	2	2	1	108	0	36
NC_000001.11	154273962	154274949	1	1	1	108	0	37
NC_000001.11	155210416	155210547	1	1	1	108	1	37
NC_000001.11	165768270	165768681	2	2	1	108	0	37
NC_000001.11	201872962	201874249	1	1	1	108	0	36
NC_000001.11	220030481	220032386	2	2	1	108	0	37
NC_000001.11	952140	952411	2	2	1	107	0	37
NC_000001.11	29150193	29154695	2	2	1	107	0	37
NC_000001.11	37979534	37980585	2	2	1	107	0	37
NC_000001.11	41002255	41003113	1	1	1	107	0	35
NC_000001.11	54041806	54043372	2	2	1	107	0	36
NC_000001.11	54876048	54883617	2	2	1	107	6	37
NC_000001.11	112619884	112647209	1	1	1	107	0	37
NC_000001.11	112659102	112659700	1	1	1	107	0	37
NC_000001.11	154255327	154255682	1	1	1	107	0	37
NC_000001.11	154552821	154553031	2	2	1	107	0	36
NC_000001.11	202333336	202333449	2	2	1	107	0	37
NC_000001.11	948233	948489	2	2	1	106	0	36
NC_000001.11	41008891	41009444	1	1	1	106	0	37
NC_000001.11	70235551	70237424	1	1	1	106	0	37
NC_000001.11	114570751	114575589	2	2	1	106	0	37
NC_000001.11	114581392	114581498	2	2	1	106	0	36
NC_000001.11	154235292	154236565	1	1	1	106	1	37
NC_000001.11	154254891	154255151	1	1	1	106	0	35
NC_000001.11	155721619	155725381	1	1	1	106	0	37
NC_000001.11	161328498	161340593	1	1	1	106	0	36
NC_000001.11	219984258	219987141	2	2	1	106	0	36
NC_000001.11	225555084	225567248	2	2	1	106	1	36
NC_000001.11	10467333	10469176	2	2	1	105	0	37
NC_000001.11	23056039	23057483	1	1	1	105	0	37
NC_000001.11	23978818	23980190	2	2	1	105	0	37
NC_000001.11	31632639	31633158	2	2	1	105	0	37
NC_000001.11	36301697	36303795	1	1	1	105	1	37
NC_000001.11	154228726	154234590	1	1	1	105	0	37
NC_000001.11	154552184	154552403	2	2	1	105	0	36
NC_000001.11	161158212	161158411	1	1	1	105	0	36
NC_000001.11	220107152	220110785	1	1	1	105	0	37
NC_000001.11	220126844	220134401	1	1	1	105	0	36
NC_000001.11	19251864	19254781	1	1	1	104	0	37
NC_000001.11	19257985	19258476	1	1	1	104	0	37
NC_000001.11	23081574	23082219	1	1	1	104	0	36
NC_000001.11	23082367	23083178	1	1	1	104	0	37
NC_000001.11	77964357	77964645	2	2	1	104	0	37
NC_000001.11	154225214	154227281	1	1	1	104	3	35
NC_000001.11	154261110	154261591	1	1	1	104	0	37
NC_000001.11	154551005	154551396	2	2	1	104	0	37
NC_000001.11	161206598	161209192	1	1	1	104	0	37
NC_000001.11	219980241	219980755	2	2	1	104	0	37
NC_000001.11	219983399	219984205	2	2	1	104	0	37
NC_000001.11	220022519	220024263	2	2	1	104	0	37
NC_000001.11	40997527	41001028	1	1	1	103	0	37
NC_000001.11	54853613	54854036	2	2	1	103	0	37
NC_000001.11	63478834	63490082	2	2	1	103	0	37
NC_000001.11	71078566	71078655	2	2	1	103	0	36
NC_000001.11	150267790	150267956	2	2	1	103	0	37
NC_000001.11	152032824	152033647	2	2	1	103	0	36
NC_000001.11	153642430	153643226	1	1	1	103	0	37
NC_000001.11	154246376	154249238	1	1	1	103	0	36
NC_000001.11	165649965	165651013	1	1	1	103	0	37
NC_000001.11	193028149	193029178	2	2	1	103	0	37
NC_000001.11	220141949	220142943	1	1	1	103	0	37
NC_000001.11	231529360	231537212	1	1	1	103	0	37
NC_000001.11	241506169	241508602	2	2	1	103	0	37
NC_000001.11	23691830	23692611	1	1	1	102	0	13
NC_000001.11	31292007	31293218	2	2	1	102	0	37
NC_000001.11	36461313	36462087	2	2	1	102	1	35
NC_000001.11	40983457	40984820	1	1	1	102	0	37
NC_000001.11	75734872	75739979	1	1	1	102	0	36
NC_000001.11	77967667	77968164	2	2	1	102	0	37
NC_000001.11	149923730	149923840	2	2	1	102	0	36
NC_000001.11	155727739	155729041	1	1	1	102	0	37
NC_000001.11	193021196	193022925	2	2	1	102	0	35
NC_000001.11	228140364	228145510	1	1	1	102	0	37
NC_000001.11	946546	948130	2	2	1	101	2	37
NC_000001.11	6225263	6231901	2	2	1	101	0	36
NC_000001.11	19258554	19258680	1	1	1	101	0	37
NC_000001.11	31630843	31632494	2	2	1	101	0	37
NC_000001.11	37593847	37595758	2	2	1	101	0	37
NC_000001.11	37978828	37978987	2	2	1	101	0	37
NC_000001.11	39571350	39572392	2	2	1	101	1	35
NC_000001.11	71065138	71065677	2	2	1	101	0	37
NC_000001.11	71069363	71070826	2	2	1	101	2	35
NC_000001.11	75733629	75734790	1	1	1	101	0	37
NC_000001.11	75740111	75745805	1	1	1	101	0	37
NC_000001.11	77966956	77967048	2	2	1	101	0	37
NC_000001.11	109548839	109573736	1	1	1	101	6	37
NC_000001.11	150267479	150267715	2	2	1	101	0	37
NC_000001.11	154553173	154554734	2	2	1	101	0	36
NC_000001.11	165891323	165896189	1	1	1	101	0	37
NC_000001.11	167924538	167935732	2	2	1	101	1	37
NC_000001.11	220096227	220100489	1	1	1	101	0	36
NC_000001.11	223757381	223759269	1	1	1	101	0	21
NC_000001.11	225404707	225406663	2	2	1	101	0	37
NC_000001.11	244424061	244424320	2	2	1	101	1	37
NC_000001.11	25343074	25351625	1	1	1	100	0	37
NC_000001.11	28737683	28738258	1	1	1	100	0	29
NC_000001.11	37980725	37981728	2	2	1	100	0	37
NC_000001.11	40060171	40061734	1	1	1	100	1	36
NC_000001.11	40070283	40070429	1	1	1	100	0	36
NC_000001.11	43360962	43361119	1	1	1	100	0	37
NC_000001.11	52414648	52414761	1	1	1	100	0	28
NC_000001.11	75794234	75794509	1	3	1	100	0	36
NC_000001.11	154597977	154598401	2	2	1	100	0	37
NC_000001.11	155318292	155318664	1	1	1	100	0	37
NC_000001.11	160295860	160296060	2	2	1	100	0	36
NC_000001.11	241512144	241513602	2	2	1	100	0	36
NC_000001.11	31260122	31261528	2	2	1	99	0	37
NC_000001.11	39569690	39569862	2	2	1	99	0	37
NC_000001.11	62441609	62442194	1	1	1	99	0	37
NC_000001.11	77970016	77978884	2	2	1	99	0	36
NC_000001.11	84489729	84490318	1	1	1	99	0	37
NC_000001.11	114568257	114569991	2	2	1	99	0	37
NC_000001.11	151231802	151232247	1	1	1	99	0	37
NC_000001.11	151986252	151993751	2	2	1	99	1	37
NC_000001.11	153960755	153962219	2	2	1	99	0	37
NC_000001.11	156782330	156786607	1	1	1	99	0	37
NC_000001.11	156787175	156791696	1	1	1	99	0	37
NC_000001.11	220143135	220145508	1	1	1	99	0	37
NC_000001.11	223749123	223750889	1	1	1	99	0	37
NC_000001.11	944801	945056	2	2	1	98	0	37
NC_000001.11	999433	999525	2	2	1	98	0	37
NC_000001.11	6327414	6333476	2	2	1	98	0	37
NC_000001.11	19257522	19257832	1	1	1	98	0	37
NC_000001.11	23079178	23079552	1	1	1	98	0	37
NC_000001.11	36292710	36293850	1	1	1	98	0	37
NC_000001.11	39564774	39565105	2	2	1	98	0	36
NC_000001.11	41010255	41011657	1	1	1	98	0	34
NC_000001.11	42666068	42666546	1	1	1	98	0	37
NC_000001.11	84495456	84495881	1	1	1	98	0	36
NC_000001.11	84496064	84496243	1	1	1	98	0	37
NC_000001.11	86903449	86914027	2	2	1	98	1	37
NC_000001.11	109235432	109235976	1	1	1	98	0	37
NC_000001.11	161209314	161209482	1	1	1	98	0	36
NC_000001.11	165667451	165668925	2	2	1	98	0	37
NC_000001.11	182852345	182853305	1	1	1	98	1	37
NC_000001.11	224401070	224404429	2	2	1	98	0	37
NC_000001.11	228101255	228101338	2	2	1	98	1	37
NC_000001.11	232970119	232978162	1	1	1	98	0	37
NC_000001.11	234374390	234383722	1	1	1	98	0	37
NC_000001.11	1564917	1574477	2	2	1	97	1	37
NC_000001.11	11012744	11013715	1	1	1	97	0	37
NC_000001.11	19378654	19385504	2	2	1	97	0	33
NC_000001.11	23961135	23961439	1	1	1	97	0	36
NC_000001.11	40991846	40995916	1	1	1	97	0	37
NC_000001.11	114576759	114581298	2	2	1	97	0	37
NC_000001.11	117953542	117954006	1	1	1	97	0	37
NC_000001.11	150967203	150967391	2	2	1	97	0	37
NC_000001.11	154554786	154555427	2	2	1	97	0	37
NC_000001.11	155726020	155727607	1	1	1	97	0	37
NC_000001.11	173865283	173865470	2	2	1	97	1	37
NC_000001.11	223752957	223755479	1	1	1	97	0	37
NC_000001.11	19356752	19357421	2	2	1	96	0	37
NC_000001.11	40067718	40069689	1	1	1	96	0	37
NC_000001.11	40996069	40997393	1	1	1	96	0	37
NC_000001.11	54852387	54853433	2	2	1	96	0	37
NC_000001.11	63454474	63454889	2	2	1	96	0	37
NC_000001.11	75728489	75732643	1	1	1	96	0	37
NC_000001.11	111447145	111447434	2	2	1	96	0	36
NC_000001.11	117939573	117940826	1	1	1	96	0	37
NC_000001.11	153962351	153962528	2	2	1	96	0	37
NC_000001.11	173865283	173865509	2	2	1	96	1	35
NC_000001.11	225424090	225427953	2	2	1	96	0	37
NC_000001.11	235152766	235154880	2	2	1	96	0	37
NC_000001.11	1223358	1223831	2	2	1	95	0	37
NC_000001.11	19345253	19356634	2	2	1	95	2	37
NC_000001.11	23971440	23971572	2	2	1	95	0	35
NC_000001.11	28518309	28529857	1	1	1	95	0	37
NC_000001.11	46643302	46645160	2	2	1	95	0	37
NC_000001.11	109592256	109592344	1	1	1	95	0	37
NC_000001.11	161340656	161356676	1	1	1	95	3	37
NC_000001.11	225922080	225922203	2	2	1	95	0	37
NC_000001.11	225923772	225924043	2	4	1	95	0	37
NC_000001.11	1523568	1523838	1	1	1	94	6	37
NC_000001.11	2402343	2403034	1	1	1	94	0	35
NC_000001.11	23077361	23078989	1	1	1	94	1	37
NC_000001.11	28506085	28508127	1	1	1	94	0	33
NC_000001.11	38019384	38022698	1	1	1	94	0	37
NC_000001.11	40061813	40064226	1	1	1	94	0	37
NC_000001.11	40064371	40064473	1	1	1	94	0	37
NC_000001.11	40076914	40078559	2	2	1	94	0	37
NC_000001.11	42659567	42660861	1	1	1	94	0	37
NC_000001.11	52415387	52416647	1	1	1	94	0	37
NC_000001.11	77966752	77966883	2	2	1	94	0	37
NC_000001.11	93156484	93160128	2	2	1	94	0	37
NC_000001.11	155709825	155717005	1	1	1	94	2	37
NC_000001.11	167920632	167924496	2	2	1	94	0	37
NC_000001.11	244422917	244423952	2	2	1	94	0	37
NC_000001.11	27841235	27843185	1	1	1	93	0	37
NC_000001.11	28208414	28209971	2	2	1	93	158	37
NC_000001.11	46645257	46652580	2	2	1	93	0	36
NC_000001.11	84496371	84497428	1	1	1	93	0	37
NC_000001.11	154255756	154257062	1	1	1	93	0	37
NC_000001.11	161212481	161213379	1	1	1	93	0	37
NC_000001.11	186327661	186331497	2	2	1	93	0	36
NC_000001.11	193049852	193051753	2	2	1	93	0	37
NC_000001.11	202000016	202001375	1	1	1	93	0	37
NC_000001.11	223752072	223752795	1	1	1	93	0	37
NC_000001.11	244424388	244432544	2	2	1	93	0	37
NC_000001.11	6264696	6281101	2	2	1	92	0	37
NC_000001.11	19344435	19345186	2	2	1	92	2	37
NC_000001.11	39561788	39562072	2	2	1	92	0	37
NC_000001.11	42664956	42665979	1	1	1	92	0	37
NC_000001.11	54036719	54040755	2	2	1	92	0	37
NC_000001.11	75790058	75791284	1	1	1	92	0	37
NC_000001.11	84479510	84480955	1	1	1	92	0	37
NC_000001.11	94902259	94903121	2	2	1	92	0	37
NC_000001.11	153634344	153636571	1	1	1	92	0	37
NC_000001.11	154272777	154273335	1	1	1	92	0	37
NC_000001.11	212442626	212444338	1	1	1	92	0	37
NC_000001.11	219987405	219988589	2	2	1	92	0	36
NC_000001.11	220025259	220030385	2	2	1	92	0	37
NC_000001.11	223747166	223749038	1	1	1	92	0	36
NC_000001.11	1374791	1375153	2	2	1	91	0	37
NC_000001.11	23053840	23055068	1	1	1	91	0	36
NC_000001.11	27843331	27847027	1	1	1	91	0	35
NC_000001.11	37968135	37969353	2	2	1	91	0	33
NC_000001.11	39572587	39575758	2	2	1	91	0	37
NC_000001.11	44308402	44313168	2	2	1	91	4	37
NC_000001.11	52414860	52415337	1	1	1	91	0	37
NC_000001.11	71066935	71069275	2	2	1	91	1	37
NC_000001.11	111448805	111449054	2	2	1	91	0	37
NC_000001.11	151762501	151762989	2	2	1	91	0	37
NC_000001.11	160296150	160297342	2	2	1	91	0	37
NC_000001.11	193029450	193029531	2	2	1	91	0	37
NC_000001.11	229463677	229464623	2	2	1	91	0	36
NC_000001.11	956014	956094	2	2	1	90	0	37
NC_000001.11	10463210	10463430	2	2	1	90	0	37
NC_000001.11	23069152	23071224	1	1	1	90	0	37
NC_000001.11	27830892	27832755	1	1	1	90	0	37
NC_000001.11	28743987	28768928	1	1	1	90	1	37
NC_000001.11	40064560	40066214	1	1	1	90	0	37
NC_000001.11	40991249	40991764	1	1	1	90	0	36
NC_000001.11	109573780	109573895	1	1	1	90	0	37
NC_000001.11	193029310	193029387	2	2	1	90	0	36
NC_000001.11	220094484	220096103	1	1	1	90	0	37
NC_000001.11	220134511	220136808	1	1	1	90	0	36
NC_000001.11	223750976	223751996	1	1	1	90	0	37
NC_000001.11	225415333	225417983	2	2	1	90	0	37
NC_000001.11	225567415	225652685	2	2	1	90	0	37
NC_000001.11	19357564	19378539	2	2	1	89	0	37
NC_000001.11	38016421	38017667	1	1	1	89	0	37
NC_000001.11	39565379	39567750	2	2	1	89	0	37
NC_000001.11	44313229	44319627	2	2	1	89	3	37
NC_000001.11	53930146	53939984	2	2	1	89	1	37
NC_000001.11	151760182	151760815	2	2	1	89	0	36
NC_000001.11	160213266	160213421	1	1	1	89	0	37
NC_000001.11	193023947	193028084	2	2	1	89	0	37
NC_000001.11	201135816	201143819	2	2	1	89	0	37
NC_000001.11	202946611	202948303	2	2	1	89	0	37
NC_000001.11	219988824	219996982	2	2	1	89	0	36
NC_000001.11	224398594	224398888	2	2	1	89	0	37
NC_000001.11	6825211	6871756	1	1	1	88	2	37
NC_000001.11	10418926	10419416	1	1	1	88	0	37
NC_000001.11	23071360	23072123	1	1	1	88	0	37
NC_000001.11	38022810	38023544	1	1	1	88	0	37
NC_000001.11	62442300	62443158	1	1	1	88	0	37
NC_000001.11	75761371	75762691	1	1	1	88	0	37
NC_000001.11	84481013	84482914	1	1	1	88	0	37
NC_000001.11	154552465	154552735	2	2	1	88	0	37
NC_000001.11	154555533	154555859	2	2	1	88	0	37
NC_000001.11	155209333	155210345	1	1	1	88	1	37
NC_000001.11	156724349	156726905	2	2	1	88	2	37
NC_000001.11	202333556	202334988	2	2	1	88	1	36
NC_000001.11	219981458	219982771	2	2	1	88	4	37
NC_000001.11	225519566	225530553	2	2	1	88	0	37
NC_000001.11	229445003	229449125	2	2	1	88	0	37
NC_000001.11	1527863	1529222	1	1	1	87	0	36
NC_000001.11	24669588	24670119	1	1	1	87	0	37
NC_000001.11	37567765	37568274	2	2	1	87	0	37
NC_000001.11	40080488	40089409	2	2	1	87	0	37
NC_000001.11	40091400	40092044	2	2	1	87	0	36
NC_000001.11	54875212	54875941	2	2	1	87	2	37
NC_000001.11	62443320	62444737	1	1	1	87	0	37
NC_000001.11	75724818	75728400	1	1	1	87	0	36
NC_000001.11	93872237	93873118	2	2	1	87	0	37
NC_000001.11	109738192	109738284	2	2	1	87	0	37
NC_000001.11	165903280	165905920	1	1	1	87	0	37
NC_000001.11	168184082	168184778	1	1	1	87	0	37
NC_000001.11	999788	999865	2	2	1	86	0	37
NC_000001.11	29160518	29181645	2	2	1	86	0	37
NC_000001.11	37567008	37567672	2	2	1	86	0	35
NC_000001.11	40066321	40067539	1	1	1	86	0	37
NC_000001.11	40092173	40092397	2	2	1	86	0	37
NC_000001.11	45013020	45013135	1	1	1	86	0	37
NC_000001.11	63454969	63478763	2	2	1	86	0	37
NC_000001.11	75745915	75749418	1	1	1	86	0	37
NC_000001.11	150968202	150968394	2	2	1	86	0	35
NC_000001.11	154236612	154237023	1	1	1	86	0	36
NC_000001.11	161213733	161213863	1	1	1	86	0	37
NC_000001.11	165827933	165890203	1	1	1	86	0	37
NC_000001.11	167918360	167919978	2	2	1	86	0	37
NC_000001.11	202942219	202943757	2	2	1	86	0	37
NC_000001.11	223745440	223746996	1	1	1	86	0	37
NC_000001.11	225422278	225423910	2	2	1	86	0	37
NC_000001.11	235160648	235160892	2	2	1	86	0	35
NC_000001.11	954083	955922	2	2	1	85	2	37
NC_000001.11	38012866	38016358	1	1	1	85	0	36
NC_000001.11	39003419	39004044	1	1	1	85	0	37
NC_000001.11	46652629	46653816	2	2	1	85	0	37
NC_000001.11	154589929	154590183	2	2	1	85	0	37
NC_000001.11	156266381	156266540	2	2	1	85	1	37
NC_000001.11	156791793	156794664	1	1	1	85	0	37
NC_000001.11	173830762	173831534	1	1	1	85	0	37
NC_000001.11	175014852	175018417	2	2	1	85	0	37
NC_000001.11	219980858	219981377	2	2	1	85	2	36
NC_000001.11	223755650	223757368	1	1	1	85	0	12
NC_000001.11	235137941	235138090	2	2	1	85	0	37
NC_000001.11	2400936	2402206	1	1	1	84	0	37
NC_000001.11	27838853	27841013	1	1	1	84	0	36
NC_000001.11	52404880	52405679	1	1	1	84	0	37
NC_000001.11	63441104	63446805	2	2	1	84	0	37
NC_000001.11	109738367	109739428	2	2	1	84	0	37
NC_000001.11	110019120	110019547	1	1	1	84	0	37
NC_000001.11	150966863	150967073	2	2	1	84	0	37
NC_000001.11	151232366	151232550	1	1	1	84	0	37
NC_000001.11	151232704	151234196	1	1	1	84	0	36
NC_000001.11	151236764	151238181	1	1	1	84	1	37
NC_000001.11	151265610	151266003	1	1	1	84	0	35
NC_000001.11	153636654	153638294	1	1	1	84	0	37
NC_000001.11	153659567	153661199	1	1	1	84	1	36
NC_000001.11	156232426	156233627	1	1	1	84	0	36
NC_000001.11	156274687	156277084	2	2	1	84	0	37
NC_000001.11	156277242	156277924	2	2	1	84	0	37
NC_000001.11	156738439	156738521	2	2	1	84	0	37
NC_000001.11	168198982	168199902	1	3	1	84	0	37
NC_000001.11	193023037	193023843	2	2	1	84	0	37
NC_000001.11	205719674	205720500	2	2	1	84	1	37
NC_000001.11	220102413	220102494	1	1	1	84	0	37
NC_000001.11	224389861	224393827	2	2	1	84	0	37
NC_000001.11	229464876	229465419	2	2	1	84	0	37
NC_000001.11	1217689	1218457	2	2	1	83	0	37
NC_000001.11	24814220	24827009	1	1	1	83	0	37
NC_000001.11	26170481	26170574	1	1	1	83	0	37
NC_000001.11	37569303	37574342	2	2	1	83	0	36
NC_000001.11	39564543	39564685	2	2	1	83	0	37
NC_000001.11	151185951	151190004	2	4	1	83	0	37
NC_000001.11	154251319	154251480	1	1	1	83	0	37
NC_000001.11	154585345	154585752	2	2	1	83	0	37
NC_000001.11	161213476	161213648	1	1	1	83	0	36
NC_000001.11	186322413	186322517	2	2	1	83	0	37
NC_000001.11	225921372	225921551	2	2	1	83	0	37
NC_000001.11	226146822	226152334	2	2	1	83	0	37
NC_000001.11	230979280	230988319	1	1	1	83	0	36
NC_000001.11	241502571	241504041	2	2	1	83	0	37
NC_000001.11	244417753	244418759	2	2	1	83	0	37
NC_000001.11	1223969	1228467	2	2	1	82	0	37
NC_000001.11	29109438	29112367	1	1	1	82	0	36
NC_000001.11	36289765	36291373	1	1	1	82	0	37
NC_000001.11	36296771	36300885	1	1	1	82	0	35
NC_000001.11	40089513	40091328	2	2	1	82	0	36
NC_000001.11	45014837	45014939	1	1	1	82	0	37
NC_000001.11	47374986	47375196	1	1	1	82	1	37
NC_000001.11	51819874	51821497	2	2	1	82	0	36
NC_000001.11	54047373	54052999	2	2	1	82	0	37
NC_000001.11	77092491	77122274	2	2	1	82	1	36
NC_000001.11	109582566	109586215	1	1	1	82	0	37
NC_000001.11	150966289	150966475	2	2	1	82	1	37
NC_000001.11	151239179	151239954	1	1	1	82	0	37
NC_000001.11	160283640	160285054	2	2	1	82	0	37
NC_000001.11	193016396	193021096	2	2	1	82	0	37
NC_000001.11	219982845	219983188	2	2	1	82	0	37
NC_000001.11	231275499	231276134	1	1	1	82	0	37
NC_000001.11	231528827	231529254	1	1	1	82	0	37
NC_000001.11	231537328	231542480	1	1	1	82	0	37
NC_000001.11	236552108	236553580	2	2	1	82	0	37
NC_000001.11	11675175	11675657	2	2	1	81	1	37
NC_000001.11	33329147	33330070	2	2	1	81	0	37
NC_000001.11	53804010	53806424	2	2	1	81	0	37
NC_000001.11	53928441	53930038	2	2	1	81	0	37
NC_000001.11	68148661	68150187	2	2	1	81	0	37
NC_000001.11	84482996	84489632	1	1	1	81	0	36
NC_000001.11	151166542	151166933	1	1	1	81	2	37
NC_000001.11	154227360	154228614	1	1	1	81	3	36
NC_000001.11	165651088	165651977	1	1	1	81	0	37
NC_000001.11	180413472	180430179	2	2	1	81	0	36
NC_000001.11	201143952	201146739	2	2	1	81	0	36
NC_000001.11	201146849	201151760	2	2	1	81	0	36
NC_000001.11	220033659	220034913	2	2	1	81	0	34
NC_000001.11	230997268	231000137	1	1	1	81	0	37
NC_000001.11	241497971	241500436	2	2	1	81	0	37
NC_000001.11	2399515	2400856	1	1	1	80	0	36
NC_000001.11	6820251	6825091	1	1	1	80	0	37
NC_000001.11	27847093	27850092	1	1	1	80	0	37
NC_000001.11	31919659	31937986	2	2	1	80	0	36
NC_000001.11	37592807	37593761	2	2	1	80	0	37
NC_000001.11	38998312	39000971	1	1	1	80	0	37
NC_000001.11	39562204	39562322	2	2	1	80	1	34
NC_000001.11	40258395	40260838	1	1	1	80	0	35
NC_000001.11	40979830	40983277	1	1	1	80	0	37
NC_000001.11	43359007	43359166	1	1	1	80	0	35
NC_000001.11	46635971	46643193	2	2	1	80	0	36
NC_000001.11	77965232	77966693	2	2	1	80	0	36
NC_000001.11	149924015	149925835	2	2	1	80	0	34
NC_000001.11	155172893	155173220	2	2	1	80	0	37
NC_000001.11	186323871	186325763	2	2	1	80	0	36
NC_000001.11	202943946	202944982	2	2	1	80	0	36
NC_000001.11	220102605	220102686	1	1	1	80	0	37
NC_000001.11	232956444	232969908	1	1	1	80	0	37
NC_000001.11	241513714	241517181	2	2	1	80	0	37
NC_000001.11	244432596	244436824	2	2	1	80	0	37
NC_000001.11	6339590	6349748	2	2	1	79	0	37
NC_000001.11	24651613	24652433	1	3	1	79	0	37
NC_000001.11	29149227	29150102	2	2	1	79	0	37
NC_000001.11	39562417	39563613	2	2	1	79	1	37
NC_000001.11	44221641	44247938	2	2	1	79	0	37
NC_000001.11	68489609	68494429	2	2	1	79	0	37
NC_000001.11	75732742	75732852	1	1	1	79	0	37
NC_000001.11	110018017	110018372	1	1	1	79	0	37
NC_000001.11	117952997	117953475	1	1	1	79	0	37
NC_000001.11	154257435	154258976	1	1	1	79	0	37
NC_000001.11	156266679	156267469	2	2	1	79	0	36
NC_000001.11	161213922	161214155	1	1	1	79	1	37
NC_000001.11	193029658	193049745	2	2	1	79	2	37
NC_000001.11	212433121	212442564	1	1	1	79	0	37
NC_000001.11	212782427	212784362	2	2	1	79	0	37
NC_000001.11	223769910	223770446	1	1	1	79	0	36
NC_000001.11	225514901	225517195	2	2	1	79	0	37
NC_000001.11	235148448	235152705	2	2	1	79	0	36
NC_000001.11	11095882	11098019	2	2	1	78	0	37
NC_000001.11	20745092	20745542	2	2	1	78	0	37
NC_000001.11	20771074	20773450	2	4	1	78	0	35
NC_000001.11	36291547	36292597	1	1	1	78	0	37
NC_000001.11	38018578	38019058	1	1	1	78	0	36
NC_000001.11	41001118	41002159	1	1	1	78	0	36
NC_000001.11	42667441	42676583	1	1	1	78	3	33
NC_000001.11	52059902	52064824	1	1	1	78	1	36
NC_000001.11	109574038	109579203	1	1	1	78	0	37
NC_000001.11	109739909	109740239	2	2	1	78	0	37
NC_000001.11	110019627	110020730	1	1	1	78	0	37
NC_000001.11	150578492	150578842	2	2	1	78	0	37
NC_000001.11	151227401	151231670	1	1	1	78	0	37
NC_000001.11	154551820	154551920	2	2	1	78	0	37
NC_000001.11	154551980	154552092	2	2	1	78	0	37
NC_000001.11	156260627	156261332	2	2	1	78	1	37
NC_000001.11	156738135	156738342	2	2	1	78	0	37
NC_000001.11	161202481	161203436	1	1	1	78	0	37
NC_000001.11	180430263	180492268	2	2	1	78	1	35
NC_000001.11	186314725	186317481	2	2	1	78	1	37
NC_000001.11	186325855	186326103	2	2	1	78	0	37
NC_000001.11	220024457	220025131	2	2	1	78	0	37
NC_000001.11	229295911	229297481	1	1	1	78	0	37
NC_000001.11	235341779	235342010	1	1	1	78	0	37
NC_000001.11	236555940	236556099	2	2	1	78	0	37
NC_000001.11	11674817	11675081	2	2	1	77	0	37
NC_000001.11	20776751	20779811	2	2	1	77	1	35
NC_000001.11	23073404	23077227	1	1	1	77	0	37
NC_000001.11	36287271	36289059	1	3	1	77	0	37
NC_000001.11	37575700	37576427	2	2	1	77	0	36
NC_000001.11	39570003	39571233	2	2	1	77	0	37
NC_000001.11	40059459	40060066	1	1	1	77	0	35
NC_000001.11	53015044	53027968	1	1	1	77	1	37
NC_000001.11	75789357	75789951	1	1	1	77	0	37
NC_000001.11	111447577	111448618	2	2	1	77	0	37
NC_000001.11	117948507	117949750	1	1	1	77	1	36
NC_000001.11	151242568	151246919	1	1	1	77	0	37
NC_000001.11	160290687	160291334	2	2	1	77	0	36
NC_000001.11	161172090	161172226	2	2	1	77	0	37
NC_000001.11	202001768	202003236	1	1	1	77	1	37
NC_000001.11	220011057	220018448	2	2	1	77	0	36
NC_000001.11	220138044	220139007	1	1	1	77	0	37
NC_000001.11	229495566	229495891	2	2	1	77	0	37
NC_000001.11	235138175	235148403	2	2	1	77	0	37
NC_000001.11	31293349	31296610	2	2	1	76	0	37
NC_000001.11	32192732	32193207	1	1	1	76	1	37
NC_000001.11	53923948	53928371	2	2	1	76	0	33
NC_000001.11	112702694	112702998	2	2	1	76	0	37
NC_000001.11	117938559	117939476	1	1	1	76	0	36
NC_000001.11	150969092	150974618	2	2	1	76	0	37
NC_000001.11	151054322	151055015	2	2	1	76	0	37
NC_000001.11	156051328	156051705	2	2	1	76	7	37
NC_000001.11	160280247	160282038	2	2	1	76	0	37
NC_000001.11	160297439	160297555	2	2	1	76	0	37
NC_000001.11	165652036	165654278	1	1	1	76	0	37
NC_000001.11	173840974	173845228	1	1	1	76	0	37
NC_000001.11	186334534	186335067	2	2	1	76	0	37
NC_000001.11	203016141	203018480	1	1	1	76	33	37
NC_000001.11	218305126	218307430	1	1	1	76	0	35
NC_000001.11	220035014	220040184	2	2	1	76	0	37
NC_000001.11	230265368	230274444	1	1	1	76	5	37
NC_000001.11	1522900	1523510	1	1	1	75	2	36
NC_000001.11	6333569	6339432	2	2	1	75	0	37
NC_000001.11	11680472	11680561	2	2	1	75	0	37
NC_000001.11	36140167	36149336	2	2	1	75	0	34
NC_000001.11	68155261	68159122	2	2	1	75	0	37
NC_000001.11	75750547	75761121	1	1	1	75	0	37
NC_000001.11	109586883	109592042	1	1	1	75	0	36
NC_000001.11	117952663	117952945	1	1	1	75	0	37
NC_000001.11	156054958	156055262	1	1	1	75	0	35
NC_000001.11	156055426	156057977	1	1	1	75	0	36
NC_000001.11	162576982	162579427	1	1	1	75	0	37
NC_000001.11	168184879	168191368	1	1	1	75	0	36
NC_000001.11	173825357	173826686	1	1	1	75	0	36
NC_000001.11	201151853	201153857	2	2	1	75	0	37
NC_000001.11	220040270	220046342	2	2	1	75	0	36
NC_000001.11	223744219	223745305	1	1	1	75	0	37
NC_000001.11	224394014	224398096	2	2	1	75	0	36
NC_000001.11	224418417	224419517	2	2	1	75	0	36
NC_000001.11	225921645	225921857	2	2	1	75	0	37
NC_000001.11	244411437	244415980	2	2	1	75	0	37
NC_000001.11	11069731	11070899	2	2	1	74	0	36
NC_000001.11	29065159	29097806	1	1	1	74	0	37
NC_000001.11	37979056	37979464	2	2	1	74	0	35
NC_000001.11	40281528	40285924	1	1	1	74	0	33
NC_000001.11	45015007	45015336	1	1	1	74	0	36
NC_000001.11	93354072	93360492	1	1	1	74	0	36
NC_000001.11	93870793	93872071	2	2	1	74	1	37
NC_000001.11	109579362	109582436	1	1	1	74	0	35
NC_000001.11	111697498	111703335	1	1	1	74	0	37
NC_000001.11	151761553	151762104	2	2	1	74	0	37
NC_000001.11	154596996	154597122	2	2	1	74	0	37
NC_000001.11	156723463	156724147	2	2	1	74	0	36
NC_000001.11	173845292	173850326	1	1	1	74	0	37
NC_000001.11	201871328	201872827	1	1	1	74	0	37
NC_000001.11	202941702	202942024	2	2	1	74	0	37
NC_000001.11	206591846	206593618	2	2	1	74	0	37
NC_000001.11	220032527	220033501	2	2	1	74	0	36
NC_000001.11	229484146	229486370	2	2	1	74	0	37
NC_000001.11	229487614	229489954	2	2	1	74	0	37
NC_000001.11	230274565	230279302	1	1	1	74	2	37
NC_000001.11	241852412	241853357	1	1	1	74	0	37
NC_000001.11	244862731	244863616	2	2	1	74	0	37
NC_000001.11	6281287	6294863	2	2	1	73	0	37
NC_000001.11	24666926	24669122	1	1	1	73	0	37
NC_000001.11	27832817	27838698	1	1	1	73	0	36
NC_000001.11	29115804	29116818	1	1	1	73	1	36
NC_000001.11	37582337	37582777	2	2	1	73	0	37
NC_000001.11	51816390	51818065	2	2	1	73	0	37
NC_000001.11	51821556	51823663	2	2	1	73	0	36
NC_000001.11	54722800	54728345	1	1	1	73	0	37
NC_000001.11	68489035	68489451	2	2	1	73	1	37
NC_000001.11	77161406	77161593	2	2	1	73	0	36
NC_000001.11	84490473	84495372	1	1	1	73	0	35
NC_000001.11	94903189	94903402	2	2	1	73	0	36
NC_000001.11	109739494	109739832	2	2	1	73	0	36
NC_000001.11	117955359	117957067	1	1	1	73	0	36
NC_000001.11	151177032	151178000	2	2	1	73	0	37
NC_000001.11	155212220	155212384	1	1	1	73	0	37
NC_000001.11	156768240	156782281	1	1	1	73	0	37
NC_000001.11	224398227	224398514	2	2	1	73	0	36
NC_000001.11	229475733	229477596	2	2	1	73	0	36
NC_000001.11	236557346	236558236	2	2	1	73	0	36
NC_000001.11	241508786	241511966	2	2	1	73	0	37
NC_000001.11	244420297	244422834	2	2	1	73	1	37
NC_000001.11	24797852	24814093	1	1	1	72	0	37
NC_000001.11	25340580	25342960	1	1	1	72	0	37
NC_000001.11	36293936	36296582	1	1	1	72	0	37
NC_000001.11	52412625	52413878	1	1	1	72	0	37
NC_000001.11	54045787	54047266	2	2	1	72	0	37
NC_000001.11	68150357	68153516	2	2	1	72	0	35
NC_000001.11	93154889	93156299	2	2	1	72	0	35
NC_000001.11	93346866	93353907	1	1	1	72	0	36
NC_000001.11	151760900	151761450	2	2	1	72	0	37
NC_000001.11	154551493	154551770	2	2	1	72	0	37
NC_000001.11	161173728	161173858	2	2	1	72	0	37
NC_000001.11	165631294	165649840	1	1	1	72	3	37
NC_000001.11	173828400	173830659	1	1	1	72	0	37
NC_000001.11	186320419	186322317	2	2	1	72	0	35
NC_000001.11	186322587	186323685	2	2	1	72	0	37
NC_000001.11	186331582	186332194	2	2	1	72	0	37
NC_000001.11	186333395	186334324	2	2	1	72	0	36
NC_000001.11	186336695	186337012	2	2	1	72	0	37
NC_000001.11	206599613	206599732	2	2	1	72	0	37
NC_000001.11	224404571	224411426	2	2	1	72	0	37
NC_000001.11	229297637	229298976	1	3	1	72	0	37
NC_000001.11	229452644	229458160	2	2	1	72	0	36
NC_000001.11	229465520	229466633	2	2	1	72	0	37
NC_000001.11	229506159	229508067	2	2	1	72	0	36
NC_000001.11	6294981	6318491	2	2	1	71	0	37
NC_000001.11	6635701	6636116	2	2	1	71	0	37
NC_000001.11	23072198	23073291	1	1	1	71	0	36
NC_000001.11	38017771	38018463	1	1	1	71	0	37
NC_000001.11	52413992	52414620	1	1	1	71	0	27
NC_000001.11	53028072	53038916	1	1	1	71	1	33
NC_000001.11	53800849	53803927	2	2	1	71	0	37
NC_000001.11	54716020	54716599	1	1	1	71	0	37
NC_000001.11	68159248	68193954	2	2	1	71	0	37
NC_000001.11	70234789	70235500	1	1	1	71	0	37
NC_000001.11	75791572	75792180	1	1	1	71	0	37
NC_000001.11	87340203	87344787	1	1	1	71	0	37
NC_000001.11	110020852	110021673	1	1	1	71	2	37
NC_000001.11	153982809	153983218	2	2	1	71	0	37
NC_000001.11	154585866	154586180	2	2	1	71	0	34
NC_000001.11	155308966	155310042	1	1	1	71	0	37
NC_000001.11	156213177	156232319	1	1	1	71	2	37
NC_000001.11	168191501	168196546	1	1	1	71	0	37
NC_000001.11	186335130	186335337	2	2	1	71	0	37
NC_000001.11	202945170	202946438	2	2	1	71	0	36
NC_000001.11	223761618	223762185	1	1	1	71	0	37
NC_000001.11	228101474	228102079	2	2	1	71	2	36
NC_000001.11	235161068	235161173	2	2	1	71	0	37
NC_000001.11	999614	999691	2	2	1	70	0	36
NC_000001.11	7961794	7962762	1	1	1	70	0	37
NC_000001.11	11676141	11676847	2	2	1	70	3	36
NC_000001.11	77206732	77210435	2	2	1	70	0	36
NC_000001.11	77956701	77960183	2	2	1	70	0	37
NC_000001.11	117954628	117955314	1	1	1	70	0	37
NC_000001.11	151178146	151184316	2	2	1	70	0	37
NC_000001.11	151763147	151763326	2	2	1	70	0	37
NC_000001.11	160282201	160282416	2	2	1	70	0	37
NC_000001.11	160325653	160332447	2	2	1	70	0	36
NC_000001.11	162561778	162566011	1	1	1	70	0	37
NC_000001.11	203007864	203008642	1	1	1	70	2	36
NC_000001.11	206595839	206597099	2	2	1	70	0	37
NC_000001.11	220106061	220107060	1	1	1	70	0	37
NC_000001.11	223772240	223774833	1	1	1	70	0	37
NC_000001.11	228102689	228102898	2	2	1	70	0	36
NC_000001.11	229442041	229444913	2	2	1	70	0	36
NC_000001.11	229500864	229501998	2	2	1	70	0	37
NC_000001.11	244409639	244411286	2	2	1	70	0	37
NC_000001.11	244437769	244451634	2	2	1	70	0	36
NC_000001.11	1257131	1257207	2	2	1	69	0	37
NC_000001.11	1526532	1527694	1	1	1	69	11	36
NC_000001.11	23757126	23759511	1	1	1	69	0	36
NC_000001.11	25351694	25352881	1	1	1	69	0	37
NC_000001.11	28987906	28993329	1	1	1	69	0	37
NC_000001.11	36178824	36178920	1	1	1	69	0	36
NC_000001.11	37574457	37574664	2	2	1	69	0	37
NC_000001.11	39001107	39003346	1	1	1	69	0	35
NC_000001.11	51827870	51834016	2	2	1	69	0	37
NC_000001.11	52023575	52024509	2	2	1	69	0	35
NC_000001.11	52056380	52059834	1	1	1	69	2	32
NC_000001.11	54716718	54717491	1	1	1	69	0	37
NC_000001.11	93875784	93876267	2	2	1	69	0	37
NC_000001.11	109586346	109586728	1	1	1	69	0	36
NC_000001.11	111703477	111704342	1	1	1	69	0	37
NC_000001.11	117940941	117941123	1	1	1	69	0	37
NC_000001.11	149927295	149927725	2	2	1	69	0	34
NC_000001.11	168179182	168183901	1	1	1	69	0	35
NC_000001.11	186314027	186314628	2	2	1	69	1	37
NC_000001.11	186326236	186327459	2	2	1	69	0	36
NC_000001.11	203848408	203849710	1	1	1	69	0	36
NC_000001.11	229288844	229295847	1	1	1	69	0	37
NC_000001.11	229449191	229450524	2	2	1	69	0	36
NC_000001.11	229496048	229498135	2	2	1	69	0	37
NC_000001.11	231275321	231275404	1	1	1	69	0	37
NC_000001.11	236550991	236551998	2	2	1	69	0	36
NC_000001.11	244436894	244437665	2	2	1	69	0	36
NC_000001.11	1338184	1338268	2	2	1	68	0	37
NC_000001.11	10399705	10400392	1	1	1	68	0	36
NC_000001.11	11080550	11080763	2	2	1	68	0	37
NC_000001.11	20745657	20747543	2	2	1	68	0	35
NC_000001.11	20765532	20767583	2	2	1	68	0	37
NC_000001.11	24671596	24672181	1	1	1	68	0	34
NC_000001.11	36394154	36397766	2	2	1	68	0	37
NC_000001.11	44284908	44308309	2	2	1	68	0	37
NC_000001.11	45013216	45013291	1	1	1	68	0	36
NC_000001.11	51809402	51810280	2	2	1	68	0	37
NC_000001.11	53047938	53050608	1	1	1	68	1	37
NC_000001.11	63654467	63659585	1	1	1	68	0	37
NC_000001.11	68137934	68144568	2	2	1	68	0	37
NC_000001.11	68148200	68148562	2	2	1	68	0	37
NC_000001.11	155689175	155709772	1	1	1	68	0	37
NC_000001.11	173837047	173838189	1	1	1	68	0	36
NC_000001.11	186317601	186318446	2	2	1	68	0	37
NC_000001.11	223766432	223769840	1	1	1	68	0	36
NC_000001.11	228102561	228102642	2	2	1	68	0	36
NC_000001.11	229460770	229463542	2	2	1	68	0	37
NC_000001.11	230178312	230203136	1	1	1	68	0	37
NC_000001.11	231276197	231277498	1	1	1	68	0	37
NC_000001.11	6637505	6638294	2	2	1	67	0	37
NC_000001.11	6785576	6820180	1	1	1	67	0	35
NC_000001.11	7777319	7778117	1	1	1	67	0	37
NC_000001.11	11087911	11088122	2	2	1	67	0	32
NC_000001.11	11677615	11680352	2	2	1	67	1	37
NC_000001.11	23792761	23793007	1	1	1	67	0	33
NC_000001.11	32193301	32194064	1	1	1	67	1	35
NC_000001.11	36179026	36179261	1	1	1	67	0	36
NC_000001.11	44649770	44649882	1	1	1	67	0	36
NC_000001.11	45013792	45013908	1	1	1	67	0	37
NC_000001.11	51789434	51789567	2	2	1	67	0	35
NC_000001.11	51792099	51792376	2	2	1	67	0	37
NC_000001.11	53825937	53827998	2	2	1	67	0	37
NC_000001.11	111695410	111697440	1	1	1	67	0	36
NC_000001.11	154588674	154589368	2	2	1	67	0	37
NC_000001.11	160211717	160213109	1	1	1	67	0	37
NC_000001.11	171577638	171579353	1	1	1	67	0	37
NC_000001.11	186341160	186341251	2	2	1	67	0	37
NC_000001.11	186341390	186343325	2	2	1	67	0	37
NC_000001.11	223762252	223764149	1	1	1	67	0	36
NC_000001.11	223764208	223766366	1	1	1	67	0	37
NC_000001.11	225513017	225514595	2	2	1	67	0	36
NC_000001.11	228103050	228103133	2	2	1	67	0	35
NC_000001.11	241882018	241885313	1	1	1	67	0	36
NC_000001.11	1218928	1223243	2	2	1	66	0	37
NC_000001.11	1339813	1340037	2	2	1	66	0	36
NC_000001.11	1490425	1490562	1	1	1	66	0	37
NC_000001.11	1520307	1520547	1	1	1	66	22	36
NC_000001.11	2397221	2399414	1	1	1	66	0	37
NC_000001.11	11080913	11081081	2	2	1	66	0	36
NC_000001.11	19307102	19307313	2	2	1	66	2	37
NC_000001.11	23752031	23752406	1	1	1	66	0	36
NC_000001.11	36139820	36140068	2	2	1	66	0	37
NC_000001.11	38019153	38019252	1	1	1	66	0	37
NC_000001.11	40286030	40290853	1	1	1	66	0	37
NC_000001.11	44644795	44644994	1	1	1	66	0	36
NC_000001.11	47373108	47374908	1	1	1	66	0	37
NC_000001.11	51790991	51791577	2	2	1	66	0	34
NC_000001.11	51814814	51816311	2	4	1	66	0	37
NC_000001.11	51840515	51878274	2	2	1	66	0	37
NC_000001.11	53806518	53807655	2	2	1	66	1	37
NC_000001.11	53940098	53945554	2	2	1	66	2	36
NC_000001.11	63446857	63453917	2	2	1	66	0	37
NC_000001.11	70228556	70232267	1	1	1	66	0	37
NC_000001.11	77968204	77969924	2	2	1	66	0	37
NC_000001.11	117942545	117943395	1	1	1	66	0	37
NC_000001.11	150268128	150268697	2	2	1	66	0	36
NC_000001.11	151053328	151054230	2	2	1	66	0	37
NC_000001.11	154586364	154588124	2	2	1	66	0	37
NC_000001.11	186362381	186362836	2	2	1	66	0	37
NC_000001.11	201989532	201996146	1	1	1	66	0	36
NC_000001.11	212784494	212787558	2	2	1	66	0	37
NC_000001.11	218302560	218305027	1	1	1	66	0	37
NC_000001.11	223770526	223771808	1	1	1	66	0	36
NC_000001.11	229477761	229484053	2	2	1	66	2	36
NC_000001.11	3781337	3781511	2	2	1	65	0	36
NC_000001.11	10399126	10399628	1	1	1	65	0	37
NC_000001.11	11072172	11073933	2	2	1	65	0	36
NC_000001.11	24661397	24662659	1	1	1	65	0	37
NC_000001.11	25814179	25815547	1	1	1	65	0	35
NC_000001.11	40268536	40269974	1	1	1	65	0	36
NC_000001.11	44632386	44635544	1	1	1	65	1	37
NC_000001.11	45606592	45607320	1	1	1	65	0	37
NC_000001.11	54227161	54228254	2	2	1	65	0	37
NC_000001.11	63593735	63629424	1	1	1	65	2	36
NC_000001.11	77122360	77154448	2	2	1	65	0	37
NC_000001.11	93873215	93875644	2	2	1	65	0	37
NC_000001.11	160293464	160294483	2	2	1	65	0	37
NC_000001.11	168196643	168198918	1	1	1	65	0	37
NC_000001.11	173839547	173840865	1	1	1	65	0	37
NC_000001.11	183627595	183630460	2	2	1	65	0	37
NC_000001.11	193096760	193097583	2	2	1	65	0	37
NC_000001.11	201853098	201854594	1	1	1	65	0	34
NC_000001.11	203007575	203007773	1	1	1	65	0	37
NC_000001.11	215608173	215611824	1	1	1	65	0	36
NC_000001.11	219968957	219969057	2	2	1	65	0	37
NC_000001.11	227767084	227780526	1	1	1	65	2	37
NC_000001.11	230250561	230255217	1	1	1	65	0	37
NC_000001.11	236566877	236568995	2	2	1	65	1	36
NC_000001.11	1311072	1311329	1	1	1	64	3	37
NC_000001.11	1485839	1486109	1	1	1	64	5	33
NC_000001.11	11074327	11076841	2	2	1	64	0	37
NC_000001.11	11088199	11090553	2	2	1	64	0	36
NC_000001.11	11675732	11676045	2	2	1	64	3	36
NC_000001.11	15937646	15937811	1	1	1	64	0	36
NC_000001.11	23019948	23030468	1	1	1	64	0	36
NC_000001.11	25352975	25356792	1	1	1	64	0	37
NC_000001.11	32192431	32192656	1	1	1	64	0	36
NC_000001.11	32194161	32194901	1	1	1	64	0	37
NC_000001.11	37587496	37590705	2	2	1	64	0	35
NC_000001.11	40092508	40097114	2	2	1	64	0	36
NC_000001.11	50738955	50744683	2	2	1	64	0	36
NC_000001.11	51805562	51806793	2	2	1	64	0	37
NC_000001.11	52411201	52412513	1	1	1	64	0	37
NC_000001.11	94483240	94487541	1	1	1	64	0	37
NC_000001.11	110014858	110015424	1	1	1	64	0	35
NC_000001.11	117949837	117949994	1	1	1	64	0	37
NC_000001.11	147280192	147284350	1	1	1	64	0	37
NC_000001.11	156273451	156274596	2	2	1	64	0	37
NC_000001.11	162581460	162587474	1	1	1	64	0	37
NC_000001.11	165663145	165665017	2	2	1	64	1	36
NC_000001.11	165683111	165695251	2	2	1	64	0	36
NC_000001.11	183549924	183550750	1	1	1	64	0	37
NC_000001.11	186335544	186336495	2	2	1	64	0	37
NC_000001.11	193212101	193212389	1	1	1	64	0	37
NC_000001.11	220018509	220018994	2	2	1	64	0	37
NC_000001.11	220058993	220059685	2	2	1	64	0	35
NC_000001.11	224411566	224418259	2	2	1	64	0	37
NC_000001.11	232950745	232955556	1	1	1	64	3	37
NC_000001.11	235335335	235341707	1	1	1	64	0	37
NC_000001.11	236559838	236561224	2	2	1	64	0	32
NC_000001.11	1256126	1256991	2	2	1	63	0	36
NC_000001.11	1340317	1340409	2	2	1	63	0	37
NC_000001.11	36179757	36179873	1	1	1	63	0	37
NC_000001.11	37574824	37575594	2	2	1	63	0	36
NC_000001.11	44636163	44644697	1	1	1	63	0	37
NC_000001.11	50583716	50584684	2	2	1	63	0	33
NC_000001.11	70189274	70205389	2	2	1	63	0	37
NC_000001.11	71065753	71066775	2	2	1	63	0	37
NC_000001.11	151166204	151166470	1	1	1	63	1	37
NC_000001.11	151199082	151224247	1	1	1	63	6	32
NC_000001.11	153643365	153645063	1	1	1	63	0	36
NC_000001.11	153982177	153982390	2	2	1	63	1	36
NC_000001.11	201855935	201857095	1	1	1	63	0	37
NC_000001.11	225517307	225519197	2	2	1	63	0	37
NC_000001.11	229458297	229460610	2	2	1	63	0	36
NC_000001.11	229470805	229475637	2	2	1	63	0	37
NC_000001.11	230263006	230265240	1	1	1	63	0	36
NC_000001.11	231227069	231229149	2	2	1	63	0	37
NC_000001.11	231374100	231420997	2	2	1	63	0	37
NC_000001.11	236592111	236592522	2	2	1	63	0	37
NC_000001.11	241500591	241502442	2	2	1	63	0	37
NC_000001.11	244416079	244417627	2	2	1	63	0	37
NC_000001.11	1839239	1890819	2	2	1	62	0	36
NC_000001.11	10463621	10467189	2	2	1	62	0	37
NC_000001.11	11068085	11068644	2	2	1	62	0	37
NC_000001.11	11087592	11087799	2	2	1	62	0	36
NC_000001.11	23786424	23787274	1	1	1	62	0	37
NC_000001.11	23791251	23792656	1	1	1	62	0	37
NC_000001.11	32184617	32187953	1	1	1	62	0	37
NC_000001.11	36176843	36177872	1	1	1	62	0	37
NC_000001.11	36178202	36178418	1	1	1	62	0	37
NC_000001.11	36178597	36178684	1	1	1	62	0	37
NC_000001.11	44645489	44649660	1	1	1	62	0	37
NC_000001.11	46653868	46658126	2	2	1	62	0	37
NC_000001.11	51791662	51792045	2	2	1	62	0	37
NC_000001.11	53039047	53047857	1	1	1	62	0	37
NC_000001.11	53796805	53796898	2	2	1	62	0	37
NC_000001.11	62440038	62441487	1	1	1	62	0	36
NC_000001.11	63651853	63654331	1	1	1	62	0	36
NC_000001.11	86719636	86722539	1	1	1	62	0	35
NC_000001.11	109985173	110009033	1	1	1	62	0	37
NC_000001.11	117954100	117954579	1	1	1	62	0	37
NC_000001.11	153983297	153983520	2	2	1	62	0	36
NC_000001.11	154588259	154588550	2	2	1	62	0	37
NC_000001.11	160297746	160298844	2	2	1	62	0	37
NC_000001.11	160299265	160305432	2	2	1	62	0	36
NC_000001.11	173856742	173857517	1	1	1	62	0	37
NC_000001.11	202001489	202001658	1	1	1	62	0	36
NC_000001.11	207336819	207337328	1	1	1	62	0	37
NC_000001.11	225988389	225991242	2	2	1	62	0	36
NC_000001.11	229490103	229495494	2	2	1	62	0	36
NC_000001.11	229498307	229499683	2	2	1	62	2	37
NC_000001.11	236574334	236574660	2	2	1	62	0	35
NC_000001.11	241858719	241860516	1	1	1	62	0	36
NC_000001.11	1218634	1218768	2	2	1	61	0	37
NC_000001.11	1482304	1482544	1	1	1	61	16	36
NC_000001.11	6232120	6233473	2	2	1	61	2	33
NC_000001.11	6637341	6637446	2	2	1	61	0	37
NC_000001.11	11074009	11074230	2	2	1	61	0	36
NC_000001.11	11077652	11079710	2	2	1	61	0	37
NC_000001.11	12005932	12006537	1	3	1	61	0	37
NC_000001.11	20773611	20776596	2	2	1	61	0	36
NC_000001.11	23030635	23050386	1	1	1	61	0	37
NC_000001.11	23793040	23793150	1	1	1	61	0	33
NC_000001.11	24840042	24840772	1	1	1	61	0	37
NC_000001.11	25805276	25808579	1	1	1	61	0	35
NC_000001.11	37803998	37804301	2	2	1	61	0	34
NC_000001.11	40078659	40080396	2	2	1	61	0	37
NC_000001.11	51834171	51836130	2	2	1	61	0	37
NC_000001.11	54241510	54242163	2	2	1	61	0	36
NC_000001.11	62437401	62439798	1	1	1	61	0	37
NC_000001.11	63490219	63508527	2	2	1	61	0	37
NC_000001.11	86734692	86735078	1	1	1	61	0	37
NC_000001.11	114708655	114709568	2	2	1	61	0	36
NC_000001.11	151238266	151239129	1	1	1	61	0	37
NC_000001.11	156253079	156253448	2	2	1	61	0	35
NC_000001.11	160323531	160325542	2	2	1	61	0	37
NC_000001.11	171558144	171561017	1	1	1	61	0	37
NC_000001.11	180397606	180413365	2	2	1	61	0	37
NC_000001.11	186318604	186318732	2	2	1	61	0	37
NC_000001.11	201847341	201847551	1	1	1	61	1	37
NC_000001.11	223759482	223761580	1	1	1	61	0	37
NC_000001.11	226985341	226986452	1	1	1	61	0	36
NC_000001.11	227734033	227734650	2	2	1	61	0	37
NC_000001.11	231272392	231273921	1	1	1	61	0	37
NC_000001.11	231274063	231275220	1	1	1	61	0	36
NC_000001.11	244418915	244420169	2	2	1	61	0	37
NC_000001.11	1762036	1765227	2	2	1	60	1	36
NC_000001.11	9749914	9751472	2	2	1	60	0	37
NC_000001.11	10461703	10463057	2	2	1	60	0	36
NC_000001.11	11068707	11069558	2	2	1	60	0	36
NC_000001.11	11070974	11072086	2	2	1	60	0	37
NC_000001.11	23050521	23053760	1	1	1	60	0	36
NC_000001.11	24745626	24797741	1	1	1	60	0	37
NC_000001.11	25809151	25809682	1	1	1	60	0	37
NC_000001.11	30933343	30936642	2	2	1	60	0	36
NC_000001.11	36180068	36180247	1	1	1	60	0	37
NC_000001.11	37568358	37568850	2	2	1	60	0	37
NC_000001.11	37590846	37592711	2	2	1	60	0	36
NC_000001.11	47334117	47368468	1	1	1	60	0	36
NC_000001.11	51789658	51790532	2	2	1	60	0	37
NC_000001.11	52086172	52086711	1	1	1	60	12	37
NC_000001.11	63648653	63651668	1	1	1	60	0	32
NC_000001.11	68146013	68148135	2	2	1	60	0	37
NC_000001.11	90020923	90022249	1	1	1	60	0	36
NC_000001.11	93160227	93180053	2	2	1	60	0	35
NC_000001.11	120160531	120163209	2	2	1	60	10	37
NC_000001.11	150968513	150968917	2	2	1	60	0	37
NC_000001.11	151167219	151167325	1	1	1	60	0	37
NC_000001.11	154261698	154263102	1	1	1	60	0	37
NC_000001.11	160282503	160282943	2	2	1	60	0	36
NC_000001.11	160283110	160283529	2	2	1	60	0	37
NC_000001.11	173826787	173828332	1	1	1	60	0	37
NC_000001.11	186318829	186320311	2	2	1	60	0	36
NC_000001.11	186332344	186333121	2	2	1	60	0	37
NC_000001.11	203008811	203014888	1	1	1	60	26	36
NC_000001.11	227748234	227758994	1	1	1	60	0	36
NC_000001.11	229299073	229302861	1	1	1	60	0	37
NC_000001.11	959082	959214	2	2	1	59	0	37
NC_000001.11	2395872	2397115	1	1	1	59	0	37
NC_000001.11	20767665	20770929	2	2	1	59	0	37
NC_000001.11	20857498	20860384	2	2	1	59	0	34
NC_000001.11	32190250	32192310	1	1	1	59	0	37
NC_000001.11	37509324	37509454	2	2	1	59	1	36
NC_000001.11	37808733	37808977	1	1	1	59	0	37
NC_000001.11	43621233	43621934	1	1	1	59	0	33
NC_000001.11	45014577	45014735	1	1	1	59	0	36
NC_000001.11	46658190	46658686	2	2	1	59	0	37
NC_000001.11	47375294	47376703	1	1	1	59	1	37
NC_000001.11	51806914	51809314	2	2	1	59	0	37
NC_000001.11	52024580	52027274	2	2	1	59	0	37
NC_000001.11	77161712	77163845	2	2	1	59	0	36
NC_000001.11	77723444	77725621	2	2	1	59	0	37
NC_000001.11	85252703	85258523	2	2	1	59	0	37
NC_000001.11	110016461	110016666	1	1	1	59	0	37
NC_000001.11	111704487	111709148	1	1	1	59	0	37
NC_000001.11	117936888	117938479	1	1	1	59	0	34
NC_000001.11	153619039	153626319	2	2	1	59	0	37
NC_000001.11	153983582	153984720	2	2	1	59	0	37
NC_000001.11	154590410	154596804	2	2	1	59	0	37
NC_000001.11	154597268	154597827	2	2	1	59	0	37
NC_000001.11	160293235	160293385	2	2	1	59	0	37
NC_000001.11	160294858	160295735	2	2	1	59	0	37
NC_000001.11	183549289	183549763	1	1	1	59	0	35
NC_000001.11	201868797	201869589	1	1	1	59	0	36
NC_000001.11	203015049	203015959	1	1	1	59	28	37
NC_000001.11	231260684	231262722	1	1	1	59	0	37
NC_000001.11	232955720	232956346	1	1	1	59	0	37
NC_000001.11	241517317	241519590	2	2	1	59	0	35
NC_000001.11	1228947	1231891	2	2	1	58	0	37
NC_000001.11	1255488	1256044	2	2	1	58	0	37
NC_000001.11	1485172	1485781	1	1	1	58	4	37
NC_000001.11	1757311	1761951	2	2	1	58	4	36
NC_000001.11	6636247	6637197	2	2	1	58	0	37
NC_000001.11	6645127	6645788	2	2	1	58	0	37
NC_000001.11	11676949	11677542	2	2	1	58	1	36
NC_000001.11	23756386	23756952	1	1	1	58	0	36
NC_000001.11	23779942	23785674	1	1	1	58	0	37
NC_000001.11	37494108	37495884	2	2	1	58	0	36
NC_000001.11	37509543	37513422	2	2	1	58	2	37
NC_000001.11	50490666	50491720	2	2	1	58	0	37
NC_000001.11	52021013	52023490	2	2	1	58	0	37
NC_000001.11	53797145	53800692	2	2	1	58	0	37
NC_000001.11	75749560	75750450	1	1	1	58	0	36
NC_000001.11	94473836	94475142	1	1	1	58	0	33
NC_000001.11	110009146	110011213	1	1	1	58	0	36
NC_000001.11	114709729	114713799	2	2	1	58	0	37
NC_000001.11	117952077	117952296	1	1	1	58	0	36
NC_000001.11	120157193	120160383	2	2	1	58	4	36
NC_000001.11	151242270	151242437	1	1	1	58	0	36
NC_000001.11	154214575	154220341	2	2	1	58	0	37
NC_000001.11	156250997	156251402	2	2	1	58	2	36
NC_000001.11	156251478	156252413	2	2	1	58	3	37
NC_000001.11	156261409	156263394	2	2	1	58	2	37
NC_000001.11	156267679	156268114	2	2	1	58	0	36
NC_000001.11	160290217	160290491	2	2	1	58	0	37
NC_000001.11	160291497	160291818	2	2	1	58	0	36
NC_000001.11	160307246	160309100	2	2	1	58	0	37
NC_000001.11	160312019	160313084	2	2	1	58	0	37
NC_000001.11	160313168	160313989	2	2	1	58	0	36
NC_000001.11	165679583	165680486	2	2	1	58	0	37
NC_000001.11	165680684	165682106	2	2	1	58	0	36
NC_000001.11	180492366	180495460	2	2	1	58	0	37
NC_000001.11	229286567	229288728	1	1	1	58	0	37
NC_000001.11	230249272	230250456	1	1	1	58	0	37
NC_000001.11	230995985	230997120	1	1	1	58	0	37
NC_000001.11	1257311	1263345	2	2	1	57	0	37
NC_000001.11	1490672	1495484	1	1	1	57	4	37
NC_000001.11	7773512	7777159	1	1	1	57	0	36
NC_000001.11	11680614	11681038	2	2	1	57	0	37
NC_000001.11	11989344	11992554	1	1	1	57	0	37
NC_000001.11	24653033	24654854	1	1	1	57	0	35
NC_000001.11	36179316	36179514	1	1	1	57	0	37
NC_000001.11	36179558	36179665	1	1	1	57	0	36
NC_000001.11	36282701	36286367	1	1	1	57	0	37
NC_000001.11	37582937	37583866	2	2	1	57	0	36
NC_000001.11	37701819	37703251	1	1	1	57	0	37
NC_000001.11	40260986	40267785	1	1	1	57	0	37
NC_000001.11	51803965	51805509	2	2	1	57	0	37
NC_000001.11	51818136	51819799	2	2	1	57	0	37
NC_000001.11	54239200	54240904	2	2	1	57	0	36
NC_000001.11	54242213	54243234	2	2	1	57	0	37
NC_000001.11	54721241	54722674	1	1	1	57	0	37
NC_000001.11	77576221	77578773	2	2	1	57	0	37
NC_000001.11	147287734	147291481	1	1	1	57	0	31
NC_000001.11	151167415	151168143	1	1	1	57	0	36
NC_000001.11	151299074	151301843	2	2	1	57	0	37
NC_000001.11	154589463	154589756	2	2	1	57	0	37
NC_000001.11	156137029	156137112	1	1	1	57	0	37
NC_000001.11	162579604	162581286	1	1	1	57	0	36
NC_000001.11	193203853	193212064	1	1	1	57	0	37
NC_000001.11	206609460	206611183	2	2	1	57	0	37
NC_000001.11	212021213	212035343	2	2	1	57	0	37
NC_000001.11	229466757	229470579	2	2	1	57	0	36
NC_000001.11	235328779	235335241	1	1	1	57	0	36
NC_000001.11	236571473	236571567	2	2	1	57	0	34
NC_000001.11	236604128	236604421	2	2	1	57	0	37
NC_000001.11	1489275	1490256	1	1	1	56	7	37
NC_000001.11	11076949	11077364	2	2	1	56	0	37
NC_000001.11	11079823	11080498	2	2	1	56	0	37
NC_000001.11	11920333	11922635	2	2	1	56	0	37
NC_000001.11	11923490	11925204	2	2	1	56	1	37
NC_000001.11	11967092	11970669	1	1	1	56	0	37
NC_000001.11	12004119	12004508	1	1	1	56	0	37
NC_000001.11	27789632	27793532	1	1	1	56	0	37
NC_000001.11	28993543	28997214	1	1	1	56	0	37
NC_000001.11	29112449	29115698	1	1	1	56	0	37
NC_000001.11	44880009	44881611	2	2	1	56	0	36
NC_000001.11	47368616	47372954	1	1	1	56	0	36
NC_000001.11	52027349	52028577	2	2	1	56	0	37
NC_000001.11	61709438	61723712	2	2	1	56	0	37
NC_000001.11	68144653	68145868	2	2	1	56	0	37
NC_000001.11	77166831	77169259	2	2	1	56	0	37
NC_000001.11	77967099	77967626	2	2	1	56	0	35
NC_000001.11	109737170	109737456	2	2	1	56	0	35
NC_000001.11	110012463	110012896	1	1	1	56	0	33
NC_000001.11	110017584	110017945	1	1	1	56	0	36
NC_000001.11	117941848	117942436	1	1	1	56	0	37
NC_000001.11	147266088	147267425	1	1	1	56	0	37
NC_000001.11	147272282	147275353	1	1	1	56	1	37
NC_000001.11	150497748	150498501	1	1	1	56	0	33
NC_000001.11	151055127	151055676	2	2	1	56	0	37
NC_000001.11	151167023	151167120	1	1	1	56	0	37
NC_000001.11	151240040	151242122	1	1	1	56	0	37
NC_000001.11	151307802	151315572	2	2	1	56	0	37
NC_000001.11	156042914	156043997	2	2	1	56	2	36
NC_000001.11	160292199	160292483	2	2	1	56	0	36
NC_000001.11	171566844	171568246	1	1	1	56	0	37
NC_000001.11	173838260	173839366	1	1	1	56	0	37
NC_000001.11	185099963	185100199	1	1	1	56	0	37
NC_000001.11	186337157	186338032	2	2	1	56	0	36
NC_000001.11	201997555	201999901	1	1	1	56	0	37
NC_000001.11	206593794	206595717	2	2	1	56	0	36
NC_000001.11	206730764	206731137	1	1	1	56	0	37
NC_000001.11	207759725	207761248	1	1	1	56	0	35
NC_000001.11	207783331	207785070	1	1	1	56	0	36
NC_000001.11	215619292	215620056	1	1	1	56	0	36
NC_000001.11	225985524	225987895	2	2	1	56	0	33
NC_000001.11	236564662	236565918	2	2	1	56	0	37
NC_000001.11	241879344	241881915	1	1	1	56	0	37
NC_000001.11	953893	954003	2	2	1	55	0	37
NC_000001.11	1341806	1342052	2	2	1	55	0	37
NC_000001.11	9733547	9733971	2	2	1	55	1	37
NC_000001.11	9735175	9735466	2	2	1	55	0	37
NC_000001.11	15938877	15939295	1	1	1	55	0	37
NC_000001.11	24670316	24671385	1	1	1	55	0	37
NC_000001.11	25808790	25809025	1	1	1	55	0	37
NC_000001.11	29015768	29018223	1	1	1	55	0	36
NC_000001.11	37703348	37705440	1	1	1	55	0	36
NC_000001.11	39743298	39743823	1	1	1	55	0	36
NC_000001.11	46658738	46665255	2	2	1	55	0	36
NC_000001.11	50491802	50535368	2	2	1	55	0	37
NC_000001.11	51823787	51825286	2	2	1	55	0	34
NC_000001.11	54040838	54041723	2	2	1	55	0	36
NC_000001.11	63635020	63636233	1	1	1	55	0	32
NC_000001.11	91508398	91511596	1	1	1	55	0	36
NC_000001.11	109737752	109738090	2	2	1	55	0	37
NC_000001.11	110018468	110018551	1	1	1	55	0	37
NC_000001.11	110018651	110019050	1	1	1	55	0	37
NC_000001.11	147291553	147293607	1	1	1	55	0	37
NC_000001.11	150332768	150332978	1	1	1	55	0	36
NC_000001.11	150505706	150506915	1	1	1	55	0	37
NC_000001.11	151294139	151294408	2	2	1	55	0	34
NC_000001.11	153982601	153982718	2	2	1	55	0	36
NC_000001.11	156268184	156268289	2	2	1	55	0	36
NC_000001.11	160291930	160292011	2	2	1	55	0	37
NC_000001.11	160305774	160306353	2	2	1	55	0	37
NC_000001.11	162587669	162588692	1	1	1	55	0	37
NC_000001.11	165665131	165667308	2	2	1	55	0	36
NC_000001.11	165695398	165698377	2	2	1	55	0	37
NC_000001.11	179085894	179087910	1	1	1	55	0	34
NC_000001.11	186361870	186362287	2	2	1	55	0	36
NC_000001.11	203847688	203848330	1	1	1	55	0	36
NC_000001.11	206599093	206599462	2	2	1	55	0	37
NC_000001.11	206729476	206729971	1	1	1	55	0	37
NC_000001.11	212101085	212102841	1	1	1	55	0	37
NC_000001.11	214652990	214655240	1	1	1	55	0	37
NC_000001.11	223712878	223717761	1	1	1	55	0	37
NC_000001.11	225842475	225844497	1	1	1	55	0	37
NC_000001.11	226159359	226161530	2	2	1	55	0	37
NC_000001.11	226983035	226983551	1	1	1	55	0	36
NC_000001.11	227759486	227766958	1	1	1	55	0	37
NC_000001.11	229502103	229506039	2	2	1	55	0	35
NC_000001.11	230067407	230178217	1	1	1	55	0	34
NC_000001.11	230243428	230246062	1	1	1	55	0	37
NC_000001.11	241885508	241889464	1	1	1	55	0	36
NC_000001.11	1525292	1526460	1	1	1	54	50	36
NC_000001.11	2193911	2193997	2	2	1	54	0	34
NC_000001.11	9744006	9744394	2	2	1	54	0	36
NC_000001.11	25801161	25805141	1	1	1	54	0	36
NC_000001.11	29060485	29064981	1	1	1	54	0	37
NC_000001.11	29097936	29109335	1	1	1	54	1	36
NC_000001.11	31319167	31337174	1	1	1	54	0	37
NC_000001.11	36171582	36172463	1	1	1	54	0	37
NC_000001.11	37513539	37514656	2	2	1	54	0	36
NC_000001.11	37695951	37698904	1	1	1	54	0	37
NC_000001.11	37707065	37708321	1	1	1	54	0	37
NC_000001.11	38864715	38866879	2	2	1	54	0	37
NC_000001.11	40766704	40769355	1	1	1	54	3	37
NC_000001.11	44649958	44650703	1	1	1	54	0	37
NC_000001.11	44762659	44766825	1	1	1	54	0	37
NC_000001.11	52405840	52408568	1	1	1	54	0	37
NC_000001.11	53807792	53809694	2	2	1	54	0	37
NC_000001.11	67707713	67777457	2	2	1	54	0	35
NC_000001.11	68194228	68232193	2	2	1	54	0	37
NC_000001.11	77163943	77166718	2	2	1	54	0	32
NC_000001.11	77718048	77718595	2	2	1	54	0	37
NC_000001.11	156041988	156042152	2	2	1	54	1	36
NC_000001.11	160306494	160307162	2	2	1	54	0	36
NC_000001.11	160314126	160323430	2	2	1	54	0	36
NC_000001.11	161172332	161173604	2	2	1	54	0	37
NC_000001.11	165669014	165669261	2	2	1	54	0	37
NC_000001.11	167920091	167920546	2	2	1	54	0	37
NC_000001.11	171787931	171790451	1	1	1	54	0	37
NC_000001.11	186351471	186351975	2	2	1	54	0	37
NC_000001.11	201996264	201997318	1	1	1	54	0	37
NC_000001.11	203838065	203840305	1	1	1	54	0	36
NC_000001.11	206602454	206602950	2	2	1	54	0	37
NC_000001.11	220062955	220067301	2	2	1	54	0	37
NC_000001.11	224419616	224424517	2	2	1	54	2	37
NC_000001.11	226977524	226982026	1	1	1	54	0	37
NC_000001.11	227734817	227735011	2	2	1	54	0	37
NC_000001.11	229486529	229487465	2	2	1	54	0	36
NC_000001.11	231370699	231373979	2	2	1	54	1	36
NC_000001.11	235155113	235160510	2	2	1	54	0	36
NC_000001.11	1338437	1338521	2	2	1	53	0	37
NC_000001.11	1487915	1489203	1	1	1	53	30	37
NC_000001.11	6651603	6652828	2	2	1	53	0	35
NC_000001.11	9734143	9734947	2	2	1	53	0	37
NC_000001.11	9749647	9749763	2	2	1	53	0	36
NC_000001.11	11091180	11091492	2	2	1	53	0	37
NC_000001.11	12004614	12004824	1	1	1	53	0	36
NC_000001.11	29033246	29035825	1	1	1	53	0	37
NC_000001.11	31339049	31346639	1	1	1	53	0	37
NC_000001.11	35563427	35563766	1	1	1	53	0	37
NC_000001.11	51782644	51783914	1	1	1	53	0	37
NC_000001.11	51790650	51790899	2	2	1	53	0	34
NC_000001.11	51810405	51811993	2	2	1	53	0	35
NC_000001.11	53921768	53923903	2	2	1	53	0	36
NC_000001.11	54228478	54228747	2	2	1	53	0	29
NC_000001.11	68488505	68488915	2	2	1	53	0	37
NC_000001.11	70250504	70250610	1	1	1	53	0	37
NC_000001.11	90007751	90010087	1	1	1	53	0	36
NC_000001.11	90018785	90020791	1	1	1	53	0	37
NC_000001.11	91511924	91513057	1	1	1	53	0	37
NC_000001.11	100080660	100082002	1	1	1	53	3	37
NC_000001.11	112703120	112703643	2	2	1	53	0	37
NC_000001.11	117934683	117936768	1	1	1	53	0	37
NC_000001.11	150344262	150344433	1	1	1	53	0	37
NC_000001.11	150577492	150578243	2	2	1	53	0	37
NC_000001.11	151055994	151059478	2	2	1	53	0	35
NC_000001.11	154555965	154558226	2	2	1	53	0	37
NC_000001.11	154585044	154585216	2	2	1	53	0	37
NC_000001.11	154598586	154601040	2	2	1	53	0	37
NC_000001.11	160333680	160335241	2	2	1	53	0	37
NC_000001.11	162566349	162576776	1	1	1	53	1	36
NC_000001.11	183546338	183549207	1	1	1	53	0	35
NC_000001.11	185300559	185300971	2	2	1	53	0	37
NC_000001.11	186338244	186339641	2	2	1	53	0	35
NC_000001.11	186355769	186356285	2	2	1	53	0	36
NC_000001.11	186363002	186363341	2	4	1	53	0	37
NC_000001.11	186367983	186370969	2	2	1	53	0	36
NC_000001.11	201875229	201875943	1	1	1	53	2	35
NC_000001.11	218285456	218302293	1	1	1	53	0	37
NC_000001.11	218307633	218330947	1	1	1	53	0	36
NC_000001.11	223771926	223772180	1	1	1	53	0	36
NC_000001.11	224399035	224400949	2	2	1	53	0	37
NC_000001.11	226152620	226154646	2	2	1	53	0	36
NC_000001.11	226984656	226984875	1	1	1	53	0	36
[truncated: 202,326+ more rows]

## Sheet: Minigene WT (RT-PCR)
first base of the intron (1-based)	last base of the intron (1-based)	strand (0: undefined, 1: +, 2: -)	intron motif: 0: non-canonical; 1: GT/AG, 2: CT/AC, 3: GC/AG, 4: CT/GC, 5: AT/AC, 6: GT/AT	0: unannotated, 1: annotated	number of uniquely mapping reads crossing the junction	number of multi-mapping reads crossing the junction	maximum spliced alignment overhang	transcript defining splice junction	Description	Ratio to E3-E4	normalised	Transcript
1754	2402	1	1	1	16927	174	75	E3-E4	NM_003000.3	1
1018	1667	1	1	1	16797	110	75	E2-E3	NM_003000.3	0.99232
2540	3273	1	1	1	16677	148	75	E4-E5	NM_003000.3	0.985231
790	889	1	1	1	15285	111	75	p(-100)I1	Intron 1 Donor gain (100 bp Intron skipping)1	0.902995	0.838177	WTa1	0,96 1
779	889	1	1	0	2234	186	75	p(-111)I1	Intron 1 Donor gain (111 bp Intron skipping)1	0.131978	0.122505	WTa1
1018	2402	1	1	0	322	3	75	E2-E4	Exon 3 skipping	0.0190229	0.0176574	WTb
2515	3273	1	1	0	307	4	75	p(-25)E4	Partial Exon 4 skipping (25 bp)	0.0181367	0.0168348	WTc
2486	3273	1	1	0	88	0	73	p(-54)E4	Partial Exon 4 skipping (54 bp) ENST00000485515.6	0.00519879	0.00482562	WTd
									1Intron 1 Donor Gain/Intron 1 skipping are caused by missing Exon 1 Donor. Both variations can be found in all variants and are therefore not impacting mingene assay results. Ratios were combined to determine full length transcript ratio and described as "no effect" since examined regions are not affected.
	Total counts transcripts	18236

## Sheet: V1
first base of the intron (1-based)	last base of the intron (1-based)	number of uniquely mapping reads crossing the junction	transcript defining splice junction	splice effect	Ratio to E4-5 junction	normalised	Transcript
2540	3273	21709	E4-E5	WT	1
790	889	19795	p(-100)I1	WT	0.911834
1018	1667	15544	E2-E3	WT	0.716016
1898	2402	14264	E3+144I3	intron 3 retention (DG +144 bp)	0.657055	0.74857	V1a
1018	2402	4791	E2-E4	Exon 3 skipping	0.220692	0.25143	V1b
779	889	2876	p(-111)I1	WT	0.13248
2515	3273	390	p(-25)E4	WT	0.0179649
	1% cut off	217.09
	Total counts transcripts	19055
	intron 2/3 retention	<0,01
1754	2402			E3-E4	1
1018	1667			E2-E3	0.992
2540	3273			E4-E5	0.985
790	889			p(-100)I1	0.903
779	889			p(-111)I1	0.132
1018	2402			E2-E4	0.019
2515	3273			p(-25)E4	0.018
2486	3273			p(-54)E4	0.005
788	889			p(-102)I1	0.005
2828	3273			128I4	0.002
2540	2699			128I4	0.001

## Sheet: V2
first base of the intron (1-based)	last base of the intron (1-based)	number of uniquely mapping reads crossing the junction	transcript defining splice junction	splice effect	Ratio to E4-E5 junction	Transcript
2540	3273	18926	E4-E5	WT	1
1754	2402	17780	E3-E4	WT	0.939448
790	889	11135	p(-100)I1	WT	0.588344
779	889	1764	p(-111)I1	WT	0.0932051
790	1667	1146	E1-E3	Exon 2 skipping	0.0605516	V2b
1018	1667	944	E2-E3	WT	0.0498785	V2c
1048	1665	724	E2+30I2, E3-2I2	E2 + 30 bp Intron 2 retention (AG), E3 + 3 bp Intron retention (DG)	0.0382543	V2d
1254	1667	321	E2+236I2	236 bp Intron 2 retention (DG)	0.0169608	V2e
2515	3273	287	p(-25)E4	WT	0.0151643
			I2 (650nt)	Intron 2 retention	0.83	V2a
	1% cut off	189.26
1754	2402			E3-E4	1
1018	1667			E2-E3	0.992
2540	3273			E4-E5	0.985
790	889			p(-100)I1	0.903
779	889			p(-111)I1	0.132
1018	2402			E2-E4	0.019
2515	3273			p(-25)E4	0.018
2486	3273			p(-54)E4	0.005
788	889			p(-102)I1	0.005
2828	3273			128I4	0.002
2540	2699			128I4	0.001

## Sheet: V3
first base of the intron (1-based)	last base of the intron (1-based)	number of uniquely mapping reads crossing the junction	transcript defining splice junction	splice effect	Ratio to E2-E3 junction	normalised	Transcript
1018	1667	28101	E2-E3	WT	1
1754	3273	26738	E3-E5	E4 skipping	0.951496	0.979378	V3a
790	889	24425	p(-100)I1	WT	0.869186
779	889	3869	p(-111)I1	WT	0.137682
1018	3273	563	E2-E5	Exon 3 and Exon 4 skipping	0.0200349	0.020622	V3b
	1% cut off	281.01
	Total counts transcripts	27301
	Intron 2/3 retention	<0,01
1754	2402			E3-E4	1
1018	1667			E2-E3	0.992
2540	3273			E4-E5	0.985
790	889			p(-100)I1	0.903
779	889			p(-111)I1	0.132
1018	2402			E2-E4	0.019
2515	3273			p(-25)E4	0.018
2486	3273			p(-54)E4	0.005
788	889			p(-102)I1	0.005
2828	3273			128I4	0.002
2540	2699			128I4	0.001

## Sheet: V4
first base of the intron (1-based)	last base of the intron (1-based)	number of uniquely mapping reads crossing the junction	transcript defining splice junction	splice effect	Ratio to E3-E4	Transcript
1754	2402	23704	E3-E4	WT	1	V4
2540	3273	23552	E4-E5	WT	0.993588
1018	1667	23241	E2-E3	WT	0.980467
790	889	19723	p(-100)I1	WT	0.832054
779	889	3004	p(-111)I1	WT	0.12673
2515	3273	437	p(-25)E4	WT	0.0184357
	1% cut off	237.04
	Intron 2/3 retention	<0,01
1754	2402			E3-E4	1
1018	1667			E2-E3	0.992
2540	3273			E4-E5	0.985
790	889			p(-100)I1	0.903
779	889			p(-111)I1	0.132
1018	2402			E2-E4	0.019
2515	3273			p(-25)E4	0.018
2486	3273			p(-54)E4	0.005
788	889			p(-102)I1	0.005
2828	3273			128I4	0.002
2540	2699			128I4	0.001

## Sheet: V5
first base of the intron (1-based)	last base of the intron (1-based)	number of uniquely mapping reads crossing the junction	transcript defining splice junction	splice effect	Ratio to E3-E4	Transcript
1754	2402	23005	E3-E4	WT	1	V5
1018	1667	22981	E2-E3	WT	0.998957
2540	3273	22314	E4-E5	WT	0.969963
790	889	19621	p(-100)I1	WT	0.852902
779	889	3030	p(-111)I1	WT	0.13171
1018	2402	494	E2-E4	WT	0.0214736
2515	3273	456	p(-25)E4	WT	0.0198218
	1% cut off	230.05
	Intron 2/3 retention	<0,01
1754	2402			E3-E4	1
1018	1667			E2-E3	0.992
2540	3273			E4-E5	0.985
790	889			p(-100)I1	0.903
779	889			p(-111)I1	0.132
1018	2402			E2-E4	0.019
2515	3273			p(-25)E4	0.018
2486	3273			p(-54)E4	0.005
788	889			p(-102)I1	0.005
2828	3273			128I4	0.002
2540	2699			128I4	0.001

## Sheet: V7
first base of the intron (1-based)	last base of the intron (1-based)	number of uniquely mapping reads crossing the junction	transcript defining splice junction	splice effect	Ratio to E3-E4	normalised	Transcript
1754	2402	20620	E3-E4	WT	1
2540	3273	20211	E4-E5	WT	0.980165
790	889	17168	p(-100)I1	WT	0.83259
1018	1667	15473	E2-E3	WT	0.750388	0.823733	V7a
1014	1667	3311	p(-4)E2	DG -4 bp from E2D leading to partial skipping Exon 2	0.160572	0.176267	V7b
779	889	2521	p(-111)I1	WT	0.12226
2515	3273	383	p(-25)E4	WT	0.0185742
1018	2402	258	E2-E4	WT	0.0125121
	1% cut off	206.2
	Total counts transcripts	18784
	Intron retention	<0,01
1754	2402			E3-E4	1
1018	1667			E2-E3	0.992
2540	3273			E4-E5	0.985
790	889			p(-100)I1	0.903
779	889			p(-111)I1	0.132
1018	2402			E2-E4	0.019
2515	3273			p(-25)E4	0.018
2486	3273			p(-54)E4	0.005
788	889			p(-102)I1	0.005
2828	3273			128I4	0.002
2540	2699			128I4	0.001

## Sheet: V8
first base of the intron (1-based)	last base of the intron (1-based)	number of uniquely mapping reads crossing the junction	transcript defining splice junction	splice effect	Ratio to E4-5	Transcript
2540	3273	13748	E4-E5	WT	1
1754	2402	12257	E3-E4	WT	0.891548
790	889	9167	p(-100)I1	WT	0.666788
779	889	1582	p(-111)I1	WT	0.115071
1018	1667	618	E2-E3	WT	0.044952	V8b
1048	1665	440	E2+30I2, E3-2I2	E2 + 30 bp Intron 2 retention (AG), E3 + 2 bp Intron retention (DG)	0.0320047	V8c
790	1667	275	E1-E3	Exon 2 skipping	0.0200029	V8d
1254	1667	229	E2+236I2	236 bp Intron 2 retention (DG)	0.016657	V8e
790	2402	169	E1-E4	Exon 2 and 3 skipping	0.0122927	V8f
2515	3273	151	p(-25)E4	WT	0.0109834
1254	2402	146	E2+236I2-E4	236 bp Intron 2 retention (DG), Exon 3 skipping	0.0106197	V8g
1508	1667	145	E2+490I2	490 bp Intron 2 retention (DG)	0.010547	V8h
			I2 (650nt)	Intron 2 retention	0.86	V8a
	1% cut off	137.48
1754	2402			E3-E4	1
1018	1667			E2-E3	0.992
2540	3273			E4-E5	0.985
790	889			p(-100)I1	0.903
779	889			p(-111)I1	0.132
1018	2402			E2-E4	0.019
2515	3273			p(-25)E4	0.018
2486	3273			p(-54)E4	0.005
788	889			p(-102)I1	0.005
2828	3273			128I4	0.002
2540	2699			128I4	0.001

## Sheet: V9
first base of the intron (1-based)	last base of the intron (1-based)	number of uniquely mapping reads crossing the junction	transcript defining splice junction	splice effect	Ratio to E4-5	normalised	Transcript
2540	3273	20987	E4-E5		1
1754	2402	19028	E3-E4		0.906657
790	889	17750	p(-100)I1		0.845762
1018	1667	12101	E2-E3	WT	0.576595	0.652398	9a
1577	1667	5218	120I2/135I2	DG at -91 bp from E3D -> cryptic exon (120 bp)	0.24863
1018	1456	5058	120I2	AG + 439 bp from E2A -> cryptic exon (120 bp)	0.241006	0.272691	9b
779	889	2639	p(-111)I1	WT	0.125745
1018	1441	550	135I2	AG + 424 bp from E2A -> cryptic exon (135 bp)	0.0262067	0.029652	9d
1018	2402	321	E2-E4	WT	0.0152952
2515	3273	298	p(-25)E4	WT	0.0141993
		839.48	I2 (650nt)	Intron 2 retention	0.04	0.0452587	9c
	1% cut off	209.87
	Total counts transcripts	18548.5
1754	2402			E3-E4	1
1018	1667			E2-E3	0.992
2540	3273			E4-E5	0.985
790	889			p(-100)I1	0.903
779	889			p(-111)I1	0.132
1018	2402			E2-E4	0.019
2515	3273			p(-25)E4	0.018
2486	3273			p(-54)E4	0.005
788	889			p(-102)I1	0.005
2828	3273			128I4	0.002
2540	2699			128I4	0.001

[truncated: 47 more sheets: V10, V12, V13, V14, V15, V16, V17, V18, V19, V20, V21, V22, V23, V24, V25, V26, V27, V28, V29, V30 …]
