# Supplementary material for: Minigene-based characterization and classification of splice-associated variants in succinate dehydrogenase B
Source: Research Square preprint supplement (doi:10.21203/rs.3.rs-8661010/v1), 2026-02-24
Supplement: Supplementary file 4 [file de11e46eba950433d4233336.xlsx]

## Sheet: Transcripts
Transcript	Variant	ID (GHGA)	HGVSc	HGVSg (hg38)	genomic position (hg38)	plasmid position variant (minigene reference)	DS_AG	DS_AL	DS_DG	DS_DL	DP_AG	DP_AL	DP_DG	DP_DL	location	Aberrant splicing	ratio	Control	Type	Splice effect	Acceptor/Donor shift	Non cannonical splice motif	Exon skipping	Intron retention	AG position plasmid	DG position plasmid	cDNA_len	termin_prot_len	len_indel_nuc	RNA-HGVS NC_000001.11(NM_003000.3.3)	Protein-HGVS NP_002991.22	Identified by Sanger/Gel	Transcript ACMG Code	Comment
V7a	V7	183473	NM_003000.3:c.197A>G	1-17044764-T-C	17044764	1014	0	0	0.91	0.01	-635	124	1	-3	E2	0	0.82		no functional assesment1	no effect							840	280	0			no	N/A1	1The variant is located at the Exon 1/Exon 2 splice junction. Due to the absence of the Exon 1 donor, the results of the splicing assay cannot be functionally assessed
V7b	V7	183473	NM_003000.3:c.197A>G	1-17044764-T-C	17044764	1014	0	0	0.91	0.01	-635	124	1	-3	E2	1	0.18		no functional assesment1	partial exon skipping	E2DL/E2DG		p(-4)E2			1014	836	74	4	NM_003000.3:r.197_200del	NP_002991.2:p.(Lys67ValfsTer8)	no	N/A1	1The variant is located at the Exon 1/Exon 2 splice junction. Due to the absence of the Exon 1 donor, the results of the splicing assay cannot be functionally assessed
V2a	V2	183468	NM_003000.3:c.200+1G>A	1-17044760-C-T	17044760	1018	0.01	0.19	0.05	0.95	1325	128	-3	1	2D	1	0.83		no functional assesment1	intron retention	E2DL/E3AL			I2 (650nt)			12455 2	67	11615 2	NM_003000.3:r.200_201ins[200+1_201-1]	NP_002991.2:p.(Cys68Ter)	no	N/A1,2	1The variant is located at the Exon 1/Exon 2 splice junction. Due to the absence of the Exon 1 donor, the results of the splicing assay cannot be functionally assessed, 2Total Intron retention in MG cannot be translated to in vivo splicing, 3061 G>T (deep intron 4 region)
V2b	V2	183468	NM_003000.3:c.200+1G>A	1-17044760-C-T	17044760	1018	0.01	0.19	0.05	0.95	1325	128	-3	1	2D	1	0.06		no functional assesment1	single exon skipping	E2AL/E2DL		E2				712	36	128	NM_003000.3:r.73_200del	NP_002991.2:p.(Ala25MetfsTer12)	yes	N/A1	1The variant is located at the Exon 1/Exon 2 splice junction. Due to the absence of the Exon 1 donor, the results of the splicing assay cannot be functionally assessed, 3061 G>T (deep intron 4 region)
V2c	V2	183468	NM_003000.3:c.200+1G>A	1-17044760-C-T	17044760	1018	0.01	0.19	0.05	0.95	1325	128	-3	1	2D	0	0.05		no functional assesment1	no effect							840	280	0			no	N/A1	1The variant is located at the Exon 1/Exon 2 splice junction. Due to the absence of the Exon 1 donor, the results of the splicing assay cannot be functionally assessed, 3061 G>T (deep intron 4 region)
V2d	V2	183468	NM_003000.3:c.200+1G>A	1-17044760-C-T	17044760	1018	0.01	0.19	0.05	0.95	1325	128	-3	1	2D	1	0.04		no functional assesment1	intron retention	E2DL/I2DG, E3AL/I2AG			E2+30I2, E3-2I2	1048	1665	872	67	32	NM_003000.3:r.200_201ins[a; 200+2_200+30; 201-2_201-1]	NP_002991.2:p.(Cys68Ter)	no	N/A1	1The variant is located at the Exon 1/Exon 2 splice junction. Due to the absence of the Exon 1 donor, the results of the splicing assay cannot be functionally assessed, 3061 G>T (deep intron 4 region)
V2e	V2	183468	NM_003000.3:c.200+1G>A	1-17044760-C-T	17044760	1018	0.01	0.19	0.05	0.95	1325	128	-3	1	2D	1	0.02		no functional assesment1	intron retention	E2DL/I2DG			E2+236I2		1254	1076	67	236	NM_003000.3:r.200_201ins[200+1_200+236]	NP_002991.2:p.(Cys68Ter)	yes	N/A1	1The variant is located at the Exon 1/Exon 2 splice junction. Due to the absence of the Exon 1 donor, the results of the splicing assay cannot be functionally assessed, 3061 G>T (deep intron 4 region)
V8a	V8	183474	NM_003000.3:c.200+5G>C	1-17044756-C-G	17044756	1022	0.01	0.25	0.02	0.73	1329	132	-657	5	I2	1	0.86		no functional assesment1	intron retention	E2DL/E3AL			I2 (650nt)			12455 2	67	11615 2	NM_003000.3:r.200_201ins[200+1_201-1]	NP_002991.2:p.(Cys68Ter)	no	N/A1,2	1The variant is located at the Exon 1/Exon 2 splice junction. Due to the absence of the Exon 1 donor, the results of the splicing assay cannot be functionally assessed, 2Total Intron retention in MG cannot be translated to in vivo splicing, 1739G>T
V8b	V8	183474	NM_003000.3:c.200+5G>C	1-17044756-C-G	17044756	1022	0.01	0.25	0.02	0.73	1329	132	-657	5	I2	0	0.04		no functional assesment1	no effect							840	280	0			no	N/A1	1The variant is located at the Exon 1/Exon 2 splice junction. Due to the absence of the Exon 1 donor, the results of the splicing assay cannot be functionally assessed, 1739G>T
V8c	V8	183474	NM_003000.3:c.200+5G>C	1-17044756-C-G	17044756	1022	0.01	0.25	0.02	0.73	1329	132	-657	5	I2	1	0.03		no functional assesment1	intron retention	E2DL/I2DG, E3AL/I2AG	AG Donor, TT Acceptor		E2+30I2, E3-2I2	1048	1665	872	67	32	NM_003000.3:r.200_201ins[200+1_200+30; 201-2_201-1]	NP_002991.2:p.(Cys68Ter)	yes	N/A1	1The variant is located at the Exon 1/Exon 2 splice junction. Due to the absence of the Exon 1 donor, the results of the splicing assay cannot be functionally assessed, 1739G>T
V8d	V8	183474	NM_003000.3:c.200+5G>C	1-17044756-C-G	17044756	1022	0.01	0.25	0.02	0.73	1329	132	-657	5	I2	1	0.02		no functional assesment1	single exon skipping	E2AL/E2DL		E2				712	36	128	NM_003000.3:r.73_200del	NP_002991.2:p.(Ala25MetfsTer12)	yes	N/A1	1The variant is located at the Exon 1/Exon 2 splice junction. Due to the absence of the Exon 1 donor, the results of the splicing assay cannot be functionally assessed, 1739G>T
V8e	V8	183474	NM_003000.3:c.200+5G>C	1-17044756-C-G	17044756	1022	0.01	0.25	0.02	0.73	1329	132	-657	5	I2	1	0.02		no functional assesment1	intron retention	E2DL/I2DG			E2+236I2		1254	1076	67	236	NM_003000.3:r.200_201ins[200+1_200+236]	NP_002991.2:p.(Cys68Ter)	yes	N/A1	1The variant is located at the Exon 1/Exon 2 splice junction. Due to the absence of the Exon 1 donor, the results of the splicing assay cannot be functionally assessed, 1739G>T
V8f	V8	183474	NM_003000.3:c.200+5G>C	1-17044756-C-G	17044756	1022	0.01	0.25	0.02	0.73	1329	132	-657	5	I2	1	0.01		no functional assesment1	multiexon skipping	E2AL/E2DL, E3AL/E3DL		E2, E3				626	32	214	NM_003000.3:r.73_286del	NP_002991.2:p.(Arg27ValTer6)	yes	N/A1	1The variant is located at the Exon 1/Exon 2 splice junction. Due to the absence of the Exon 1 donor, the results of the splicing assay cannot be functionally assessed, 1739G>T
V8g	V8	183474	NM_003000.3:c.200+5G>C	1-17044756-C-G	17044756	1022	0.01	0.25	0.02	0.73	1329	132	-657	5	I2	1	0.01		no functional assesment1	intron retention, single exon skipping	E2DL/I2DG, E3AL/E3DL		E3	E2+236I2		1254	990	67	150	NM_003000.3:r.201_286delins200+1_200+236	NP_002991.2:p.(Cys68Ter)	no	N/A1	1The variant is located at the Exon 1/Exon 2 splice junction. Due to the absence of the Exon 1 donor, the results of the splicing assay cannot be functionally assessed, 1739G>T
V8h	V8	183474	NM_003000.3:c.200+5G>C	1-17044756-C-G	17044756	1022	0.01	0.25	0.02	0.73	1329	132	-657	5	I2	1	0.01		no functional assesment1	intron retention	E2DL/I2DG			E2+490I2		1508	N/A4	N/A4	N/A4	N/A4	N/A4	no	N/A1,4	1The variant is located at the Exon 1/Exon 2 splice junction. Due to the absence of the Exon 1 donor, the results of the splicing assay cannot be functionally assessed, 4Transcript cannot be assesed as Intron retetention crossses MG Intron border, 1739G>T
V47a	V47	188425	NM_003000.3:c.201-96A>G	1-17033241-T-C	17033241	1572	0.25	0.01	0.57	0.05	115	-96	1	-17	I2	0	0.61		full length	no effect							840	280	0			yes	BP7_S
V47b	V47	188425	NM_003000.3:c.201-96A>G	1-17033241-T-C	17033241	1572	0.25	0.01	0.57	0.05	115	-96	1	-17	I2	1	0.35		PTC	pseudo exon	I2AG/I2DG			115I2	1456	1572	955	73	115	NM_003000.3:r.200-201ins[201-211_201-97]	NP_002991.2:p.(Cys68AsnTer6)	yes	PVS1
V47c	V47	188425	NM_003000.3:c.201-96A>G	1-17033241-T-C	17033241	1572	0.25	0.01	0.57	0.05	115	-96	1	-17	I2	1	0.04		PTC	pseudo exon	I2AG/I2DG			130I2	1441	1572	970	78	130	NM_003000.3:r.200-201ins[201-226_201-97]	NP_002991.2:p.(Lys67AsnTer12)	no	PVS1
V9a	V9	183475	NM_003000.3:c.201-91C>G	1-17033236-G-C	17033236	1577	0.31	0.01	0.81	0.05	120	-91	1	-12	I2	0	0.65		full length	no effect							840	280	0			yes	BP7_S
V9b	V9	183475	NM_003000.3:c.201-91C>G	1-17033236-G-C	17033236	1577	0.31	0.01	0.81	0.05	120	-91	1	-12	I2	1	0.27		PTC	pseudo exon	I2AG/I2DG			120I2	1456	1577	960	73	120	NM_003000.3:r.200-201ins[201-211_201-92]	NP_002991.2:p.(Cys68AsnTer6)	no	PVS1
V9c	V9	183475	NM_003000.3:c.201-91C>G	1-17033236-G-C	17033236	1577	0.31	0.01	0.81	0.05	120	-91	1	-12	I2	1	0.05		uncharacterized2	intron retention	E2DL/E3AL			I2 (650nt)			12455 2	67	11615 2	NM_003000.3:r.200_201ins[200+1_201-1]	NP_002991.2:p.(Cys68Ter)	no	N/A2	2Total Intron retention in MG cannot be translated to in vivo splicing
V9d	V9	183475	NM_003000.3:c.201-91C>G	1-17033236-G-C	17033236	1577	0.31	0.01	0.81	0.05	120	-91	1	-12	I2	1	0.03		PTC	pseudo exon	I2AG/I2DG			135I2	1441	1577	975	78	135	NM_003000.3:r.200-201ins[201-226_201-92]	NP_002991.2:p.(Lys67AsnTer12)	no	PVS1
V10a	V10	182858	NM_003000.3:c.201-14T>G	1-17033159-A-C	17033159	1654	0.02	0.76	0	0.82	-1	-14	-1	-99	I2	1	0.74		PTC	single exon skipping	E3AL/E3DL		E3				754	88	86	NM_003000.3:r.201_286del	NP_002991.2:p.(Cys68HisfsTer21)	yes	PVS1
V10b	V10	182858	NM_003000.3:c.201-14T>G	1-17033159-A-C	17033159	1654	0.02	0.76	0	0.82	-1	-14	-1	-99	I2	0	0.17		full length	no effect							840	280	0			no	BP7_S
V10c	V10	182858	NM_003000.3:c.201-14T>G	1-17033159-A-C	17033159	1654	0.02	0.76	0	0.82	-1	-14	-1	-99	I2	1	0.09		PTC	intron retention	E3AL/I2AG			E3-13I2	1654		853	70	13	NM_003000.3:r.200_201ins[201-13_201-1]	NP_002991.2:p.(Lys67AsnfsTer4)	yes	PVS1
V48a	V48	188430	NM_003000.3:c.201-3T>A	1-17033148-A-T	17033148	1665	0	0.64	0	0.8	-75	-3	3	-88	I2	0	0.66		full length	no effect							840	280	0			yes	BP7_S
V48b	V48	188430	NM_003000.3:c.201-3T>A	1-17033148-A-T	17033148	1665	0	0.64	0	0.8	-75	-3	3	-88	I2	1	0.34		PTC	single exon skipping	E3AL/E3DL		E3				754	88	86	NM_003000.3:r.201_286del	NP_002991.2:p.(Cys68HisfsTer21)	no	PVS1
V12a	V12	183062	NM_003000.3:c.201-2A>T	1-17033147-T-A	17033147	1666	0.01	0.97	0	0.91	-36	-2	50	-87	3A	1	0.89		PTC	single exon skipping	E3AL/E3DL		E3				754	88	86	NM_003000.3:r.201_286del	NP_002991.2:p.(Cys68HisfsTer21)	yes	PVS1
V12b	V12	183062	NM_003000.3:c.201-2A>T	1-17033147-T-A	17033147	1666	0.01	0.97	0	0.91	-36	-2	50	-87	3A	1	0.07		PTC	partial exon skipping	E3AL/E3AG		p(-34)E3		1701		806	75	34	NM_003000.3:r.201_234del	NP_002991.2:p.(Cys68LeufsTer8)	no	PVS1
V12c	V12	183062	NM_003000.3:c.201-2A>T	1-17033147-T-A	17033147	1666	0.01	0.97	0	0.91	-36	-2	50	-87	3A	0	0.04		full length	no effect		TG acceptor					840	280	0			no	BP7_S
V56a	V56	189441	NM_003000.3:c.201-2A>C	1-17033147-T-A	17033147	1666	0.01	0.97	0	0.9	-36	-2	50	-87	3A	1	0.89		PTC	single exon skipping	E3AL/E3DL		E3				754	88	86	NM_003000.3:r.201_286del	NP_002991.2:p.(Cys68HisfsTer21)	yes	PVS1
V56b	V56	189441	NM_003000.3:c.201-2A>C	1-17033147-T-A	17033147	1666	0.01	0.97	0	0.9	-36	-2	50	-87	3A	1	0.06		PTC	partial exon skipping	E3AL/E3AG		p(-34)E3		1701		806	75	34	NM_003000.3:r.201_234del	NP_002991.2:p.(Cys68LeufsTer8)	no	PVS1
V56c	V56	189441	NM_003000.3:c.201-2A>C	1-17033147-T-A	17033147	1666	0.01	0.97	0	0.9	-36	-2	50	-87	3A	0	0.03		full length	no effect							840	280	0			no	BP7_S
V56d	V56	189441	NM_003000.3:c.201-2A>C	1-17033147-T-A	17033147	1666	0.01	0.97	0	0.9	-36	-2	50	-87	3A	1	0.02		PTC	intron retention	E3AL/I2AG			E3-4I2	1663		844	80	4	NM_003000.3:r.200_201ins[201-4_201-1]	NP_002991.2:p.(Lys67AsnfsTer14)	no	PVS1
V13a	V13	182859	NM_003000.3:c.201-1G>C	1-17033146-C-G	17033146	1667	0.01	0.97	0	0.9	-73	-1	51	-86	3A	1	0.4		PTC	partial exon skipping	E3AL/E3AG	AT acceptor	p(-2)E3		1669		838	78	2	NM_003000.3:r.201_202del	NP_002991.2:p.(Cys68TrpfsTer11)	yes	PVS1
V13b	V13	182859	NM_003000.3:c.201-1G>C	1-17033146-C-G	17033146	1667	0.01	0.97	0	0.9	-73	-1	51	-86	3A	1	0.36		PTC	partial exon skipping	E3AL/E3AG		p(-34)E3		1701		806	75	34	NM_003000.3:r.201_234del	NP_002991.2:p.(Cys68LeufsTer8)	no	PVS1
V13c	V13	182859	NM_003000.3:c.201-1G>C	1-17033146-C-G	17033146	1667	0.01	0.97	0	0.9	-73	-1	51	-86	3A	1	0.09		PTC	intron retention	E3AL/I2AG	TG acceptor		E3-4I2	1663		844	80	4	NM_003000.3:r.200_201ins[201-4_201-1]	NP_002991.2:p.(Lys67AsnfsTer14)	no	PVS1
V13d	V13	182859	NM_003000.3:c.201-1G>C	1-17033146-C-G	17033146	1667	0.01	0.97	0	0.9	-73	-1	51	-86	3A	1	0.08		PTC	single exon skipping	E3AL/E3DL		E3				754	88	86	NM_003000.3:r.201_286del	NP_002991.2:p.(Cys68HisfsTer21)	no	PVS1
V13e	V13	182859	NM_003000.3:c.201-1G>C	1-17033146-C-G	17033146	1667	0.01	0.97	0	0.9	-73	-1	51	-86	3A	1	0.05		in-frame	partial exon skipping	E3AL/E3AG	GG Acceptor	p(-6)E3		1673		834	278	6	NM_003000.3:r.201_206del	NP_002991.2:p.(Lys67_Gly69del)	no	PVS1_M	Small deletion in 2Fe-2S ferredoxin domain close to beta sheet structure
V13f	V13	182859	NM_003000.3:c.201-1G>C	1-17033146-C-G	17033146	1667	0.01	0.97	0	0.9	-73	-1	51	-86	3A	0	0.03		full length	no effect		AC Acceptor					840	280	0			no	BP7_S
V49a	V49	188431	NM_003000.3:c.202T>A	1-17033144-A-T	17033144	1669	0.18	0.34	0	0.5	-2	1	1	-84	E3	0	0.87		full length	no effect							840	280	0			yes	BP7_S	Close to beta sheet structure
V49b	V49	188431	NM_003000.3:c.202T>A	1-17033144-A-T	17033144	1669	0.18	0.34	0	0.5	-2	1	1	-84	E3	1	0.11		PTC	single exon skipping	E3AL/E3DL		E3				754	88	86	NM_003000.3:r.201_286del	NP_002991.2:p.(Cys68HisfsTer21)	no	PVS1
V49c	V49	188431	NM_003000.3:c.202T>A	1-17033144-A-T	17033144	1669	0.18	0.34	0	0.5	-2	1	1	-84	E3	1	0.02		in-frame	partial exon skipping	E3AL/E3AG		p(-3)E3		1670		837	279	3	NM_003000.3:r.201_203del	NP_002991.2:p.(Lys67_Cys68del)	no	PVS1_M	Small deletion in 2Fe-2S ferredoxin domain close to beta sheet structure
V54a	V54	188460	NM_003000.3:c.219G>A	1-17033127-C-T	17033127	1686	0	0.27	0	0.48	-54	18	18	-67	E3	0	1		full length	no effect							840	280	0			yes	BP7_S
V4	V4	183470	NM_003000.3:c.225T>C	1-17033121-A-G	17033121	1692	0.01	0	0.03	0	24	0	-61	-205	E3	0	1	negative	full length	no effect							840	280	0			yes	BP7_S
V14a	V14	183464	NM_003000.3:c.232A>T	1-17033114-T-A	17033114	1699	0	0.57	0	0.71	-3	31	31	-54	E3	0	0.94		full length	no effect							840	280	0			yes	BP7_S
V14b	V14	183464	NM_003000.3:c.232A>T	1-17033114-T-A	17033114	1699	0	0.57	0	0.71	-3	31	31	-54	E3	1	0.06		PTC	single exon skipping	E3AL/E3DL		E3				754	88	86	NM_003000.3:r.201_286del	NP_002991.2:p.(Cys68HisfsTer21)	no	PVS1
V55a	V55	188461	NM_003000.3:c.245A>T	1-17033101-T-A	17033101	1712	0	0.3	0	0.47	-71	44	44	-41	E3	0	1		full length	no effect							840	280	0			yes	BP7_S
V15a	V15	183465	NM_003000.3:c.286G>C	1-17033060-C-G	17033060	1753	0	0.67	0.19	0.8	-109	85	-144	0	E3	0	0.51		full length	no effect							840	280	0			yes	BP7_S
V15b	V15	183465	NM_003000.3:c.286G>C	1-17033060-C-G	17033060	1753	0	0.67	0.19	0.8	-109	85	-144	0	E3	1	0.3		PTC	single exon skipping	E3AL/E3DL		E3				754	88	86	NM_003000.3:r.201_286del	NP_002991.2:p.(Cys68HisfsTer21)	yes	PVS1
V15c	V15	183465	NM_003000.3:c.286G>C	1-17033060-C-G	17033060	1753	0	0.67	0.19	0.8	-109	85	-144	0	E3	1	0.19		PTC	intron retention	E3DL/I3DG			E3+144I3		1898	984	132	144	NM_003000.3:r.286_287ins[286+1_286+144]	NP_002991.2:p.(Gly96ArgfsTer37)	no	PVS1
V1a	V1	183467	NM_003000.3:c.286+1G>A	1-17033059-C-T	17033059	1754	0	0.74	0.33	0.94	-108	86	-143	1	3D	1	0.75	MASTER 1	PTC	intron retention	E3DL/I3DG			E3+144I3		1898	984	132	144	NM_003000.3:r.286_287ins[286+1_286+144]	NP_002991.2:p.(Gly96AspfsTer37)	yes	PVS1
V1b	V1	183467	NM_003000.3:c.286+1G>A	1-17033059-C-T	17033059	1754	0	0.74	0.33	0.94	-108	86	-143	1	3D	1	0.25	MASTER 1	PTC	single exon skipping	E3AL/E3DL		E3				754	88	86	NM_003000.3:r.201_286del	NP_002991.2:p.(Cys68HisfsTer21)	yes	PVS1
V16a	V16	182860	NM_003000.3:c.286+2T>A	1-17033058-A-T	17033058	1755	0	0.78	0.27	0.94	-107	87	-142	2	3D	1	0.5		PTC	single exon skipping	E3AL/E3DL		E3				754	88	86	NM_003000.3:r.201_286del	NP_002991.2:p.(Cys68HisfsTer21)	no	PVS1
V16b	V16	182860	NM_003000.3:c.286+2T>A	1-17033058-A-T	17033058	1755	0	0.78	0.27	0.94	-107	87	-142	2	3D	1	0.5		PTC	intron retention	E3DL/I3DG			E3+144I3		1898	984	132	144	NM_003000.3:r.286_287ins[286+1_286+144]	NP_002991.2:p.(Ile97GlufsTer36)	yes	PVS1
V17a	V17	183466	NM_003000.3:c.286+3G>C	1-17033057-C-G	17033057	1756	0	0.55	0.11	0.67	3	88	-141	3	I3	1	0.64		PTC	single exon skipping	E3AL/E3DL		E3				754	88	86	NM_003000.3:r.201_286del	NP_002991.2:p.(Cys68HisfsTer21)	yes	PVS1
V17b	V17	183466	NM_003000.3:c.286+3G>C	1-17033057-C-G	17033057	1756	0	0.55	0.11	0.67	3	88	-141	3	I3	0	0.32		full length	no effect							840	280	0			no	BP7_S
V17c	V17	183466	NM_003000.3:c.286+3G>C	1-17033057-C-G	17033057	1756	0	0.55	0.11	0.67	3	88	-141	3	I3	1	0.04		PTC	intron retention	E3DL/I3DG			E3+144I3		1898	984	132	144	NM_003000.3:r.286_287ins[286+1_286+144]	NP_002991.2:p.(Ile97GlnfsTer36)	no	PVS1
V18a	V18	183476	NM_003000.3:c.286+4A>T	1-17033056-T-A	17033056	1757	0	0.68	0.14	0.78	4	89	-140	4	I3	0	0.51		full length	no effect							840	280	0			no	BP7_S
V18b	V18	183476	NM_003000.3:c.286+4A>T	1-17033056-T-A	17033056	1757	0	0.68	0.14	0.78	4	89	-140	4	I3	1	0.42		PTC	single exon skipping	E3AL/E3DL		E3				754	88	86	NM_003000.3:r.201_286del	NP_002991.2:p.(Cys68HisfsTer21)	yes	PVS1
V18c	V18	183476	NM_003000.3:c.286+4A>T	1-17033056-T-A	17033056	1757	0	0.68	0.14	0.78	4	89	-140	4	I3	1	0.07		PTC	intron retention	E3DL/I3DG			E3+144I3		1898	984	132	144	NM_003000.3:r.286_287ins[286+1_286+144]	NP_002991.2:p.(Ile97ValfsTer36)	no	PVS1
V19a	V19	183477	NM_003000.3:c.286+5G>C	1-17033055-C-G	17033055	1758	0	0.65	0.17	0.78	-25	90	-139	5	I3	0	0.57		full length	no effect							840	280	0			yes	BP7_S
V19b	V19	183477	NM_003000.3:c.286+5G>C	1-17033055-C-G	17033055	1758	0	0.65	0.17	0.78	-25	90	-139	5	I3	1	0.3		PTC	single exon skipping	E3AL/E3DL		E3				754	88	86	NM_003000.3:r.201_286del	NP_002991.2:p.(Cys68HisfsTer21)	yes	PVS1
V19c	V19	183477	NM_003000.3:c.286+5G>C	1-17033055-C-G	17033055	1758	0	0.65	0.17	0.78	-25	90	-139	5	I3	1	0.13		PTC	intron retention	E3DL/I3DG			E3+144I3		1898	984	132	144	NM_003000.3:r.286_287ins[286+1_286+144]	NP_002991.2:p.(Ile97AspfsTer36)	no	PVS1
V20a	V20	183478	NM_003000.3:c.287-12T>A	1-17028748-A-T	17028748	2391	0	0.51	0.01	0.49	-2	-12	4	-123	I3	0	1		full length	no effect							840	280	0			yes	BP7_S
V21a	V21	183479	NM_003000.3:c.287-10T>G	1-17028746-A-C	17028746	2393	0	0.65	0	0.58	-146	-10	-1128	-121	I3	0	1		full length	no effect							840	280	0			yes	BP7_S
V22a	V22	183481	NM_003000.3:c.287-8T>G	1-17028744-A-C	17028744	2395	0	0.51	0	0.47	-133	-8	-1126	-119	I3	0	1		full length	no effect							840	280	0			yes	BP7_S
V23a	V23	183480	NM_003000.3:c.287-6T>G	1-17028742-A-C	17028742	2397	0	0.67	0	0.57	-131	-6	-1124	-142	I3	0	0.98		full length	no effect							840	280	0			yes	BP7_S
V23b	V23	183480	NM_003000.3:c.287-6T>G	1-17028742-A-C	17028742	2397	0	0.67	0	0.57	-131	-6	-1124	-142	I3	1	0.02		PTC	single exon skipping	E4AL/E4DL		E4				703	107	137	NM_003000.3:r.287_423del	NP_002991.2:p.(Ile97PhefsTer11)	no	PVS1
V24a	V24	183482	NM_003000.3:c.287-5T>G	1-17028741-A-C	17028741	2398	0	0.81	0	0.8	-141	-5	28	-141	I3	0	0.94		full length	no effect							840	280	0			yes	BP7_S	Del 2416 (T)
V24b	V24	183482	NM_003000.3:c.287-5T>G	1-17028741-A-C	17028741	2398	0	0.81	0	0.8	-141	-5	28	-141	I3	1	0.04		PTC	single exon skipping	E4AL/E4DL		E4				703	107	137	NM_003000.3:r.287_423del	NP_002991.2:p.(Ile97PhefsTer11)	no	PVS1	Del 2416 (T)
V24c	V24	183482	NM_003000.3:c.287-5T>G	1-17028741-A-C	17028741	2398	0	0.81	0	0.8	-141	-5	28	-141	I3	1	0.02		PTC	multiexon skipping	E3AL/E3DL, E4AL/E4DL		E3, E4				617	69	223	NM_003000.3:r.201_423del	NP_002991.2:p.(Cys68IleTer2)	no	PVS1	Del 2416 (T)
V25a	V25	183483	NM_003000.3:c.287-3C>G	1-17028739-G-C	17028739	2400	0	0.94	0	0.94	351	-3	30	-139	I3	1	0.82		PTC	single exon skipping	E4AL/E4DL		E4				703	107	137	NM_003000.3:r.287_423del	NP_002991.2:p.(Ile97PhefsTer11)	yes	PVS1
V25b	V25	183483	NM_003000.3:c.287-3C>G	1-17028739-G-C	17028739	2400	0	0.94	0	0.94	351	-3	30	-139	I3	0	0.14		full length	no effect							840	280	0			no	BP7_S
V25c	V25	183483	NM_003000.3:c.287-3C>G	1-17028739-G-C	17028739	2400	0	0.94	0	0.94	351	-3	30	-139	I3	1	0.03		PTC	multiexon skipping	E3AL/E3DL, E4AL/E4DL		E3, E4				617	69	223	NM_003000.3:r.201_423del	NP_002991.2:p.(Cys68IleTer2)	no	PVS1
V25d	V25	183483	NM_003000.3:c.287-3C>G	1-17028739-G-C	17028739	2400	0	0.94	0	0.94	351	-3	30	-139	I3	1	0.01		PTC	partial exon skipping	E4AL/E4AG		p(-125)E4		2527		715	111	125	NM_003000.3:r.287_411del	NP_002991.2:p.(Ile97SerfsTer15)	no	PVS1
V3a	V3	183469	NM_003000.3:c.287-2A>T	1-17028738-T-A	17028738	2401	0	0.94	0.02	0.95	-38	-2	31	-138	4A	1	0.98		PTC	single exon skipping	E4AL/E4DL		E4				703	107	137	NM_003000.3:r.287_423del	NP_002991.2:p.(Ile97PhefsTer11)	yes	PVS1
V3b	V3	183469	NM_003000.3:c.287-2A>T	1-17028738-T-A	17028738	2401	0	0.94	0.02	0.95	-38	-2	31	-138	4A	1	0.02		PTC	multiexon skipping	E3AL/E3DL, E4AL/E4DL		E3, E4				617	69	223	NM_003000.3:r.201_423del	NP_002991.2:p.(Cys68IleTer2)	no	PVS1
V26a	V26	183484	NM_003000.3:c.287-1G>T	1-17028737-C-A	17028737	2402	0	0.94	0.02	0.95	-37	-1	32	-137	4A	1	0.64		PTC	single exon skipping	E4AL/E4DL		E4				703	107	137	NM_003000.3:r.287_423del	NP_002991.2:p.(Ile97PhefsTer11)	yes	PVS1	Del 2382 (T)
V26b	V26	183484	NM_003000.3:c.287-1G>T	1-17028737-C-A	17028737	2402	0	0.94	0.02	0.95	-37	-1	32	-137	4A	1	0.18		in-frame	partial exon skipping	E4AL/E4AG		p(-36)E4		2438		804	268	36	NM_003000.3:r.287_322del	NP_002991.2:p.(Ile97_Gly108del)	no	PVS1_S	2Fe-2S ferroxidin domain, 3 FES binding sites, Decipher shows 6 pathogenic variants within region, Del 2382 (T)
V26c	V26	183484	NM_003000.3:c.287-1G>T	1-17028737-C-A	17028737	2402	0	0.94	0.02	0.95	-37	-1	32	-137	4A	1	0.07		PTC	partial exon skipping	E4AL/E4AG		p(-125)E4		2527		715	111	125	NM_003000.3:r.287_411del	NP_002991.2:p.(Ile97SerfsTer15)	no	PVS1	Del 2382 (T)
V26d	V26	183484	NM_003000.3:c.287-1G>T	1-17028737-C-A	17028737	2402	0	0.94	0.02	0.95	-37	-1	32	-137	4A	1	0.04		uncharacterized2	intron retention	E3DL/E4AL			I3 (649 nt)			5163 2	132	4323 2	NM_003000.3:r.286_287ins[286+1_286+4323]	NP_002991.2:p.(Ile97GlufsTer36)	no	N/A2	2Total Intron retention in MG cannot be translated to in vivo splicing, Del 2382 (T)
V26e	V26	183484	NM_003000.3:c.287-1G>T	1-17028737-C-A	17028737	2402	0	0.94	0.02	0.95	-37	-1	32	-137	4A	1	0.04		PTC	multiexon skipping	E3AL/E3DL, E4AL/E4DL		E3, E4				617	69	223	NM_003000.3:r.201_423del	NP_002991.2:p.(Cys68IleTer2)	no	PVS1	Del 2382 (T)
V26f	V26	183484	NM_003000.3:c.287-1G>T	1-17028737-C-A	17028737	2402	0	0.94	0.02	0.95	-37	-1	32	-137	4A	1	0.03		in-frame	partial exon skipping	E4AL/E4AG		p(-48)E4		2450		792	264	48	NM_003000.3:r.287_334del	NP_002991.2:p.(Gly96_Leu111del)	no	PVS1_S	2Fe-2S ferroxidin domain, 3 FES binding sites, Decipher shows 6 pathogenic variants within region, Del 2382 (T)
V26g	V26	183484	NM_003000.3:c.287-1G>T	1-17028737-C-A	17028737	2402	0	0.94	0.02	0.95	-37	-1	32	-137	4A	0	0.01		full length	no effect							840	280	0			no	BP7_S	Del 2382 (T)
V58a	V58	189443	NM_003000.3:c.287-1G>C	1-17028737-C-G	17028737	2402	0	0.94	0.02	0.95	-37	-1	32	-137	4A	1	0.86	MASTER 2	PTC	single exon skipping	E4AL/E4DL		E4				703	107	137	NM_003000.3:r.287_423del	NP_002991.2:p.(Ile97PhefsTer11)	yes	PVS1
V58b	V58	189443	NM_003000.3:c.287-1G>C	1-17028737-C-G	17028737	2402	0	0.94	0.02	0.95	-37	-1	32	-137	4A	1	0.04	MASTER 2	PTC	multiexon skipping	E3AL/E3DL, E4AL/E4DL		E3, E4				617	69	223	NM_003000.3:r.201_423del	NP_002991.2:p.(Cys68IleTer2)	no	PVS1
V58c	V58	189443	NM_003000.3:c.287-1G>C	1-17028737-C-G	17028737	2402	0	0.94	0.02	0.95	-37	-1	32	-137	4A	1	0.04	MASTER 2	in-frame	partial exon skipping	E4AL/E4AG		p(-36)E4		2438		804	268	36	NM_003000.3:r.287_322del	NP_002991.2:p.(Ile97_Gly108del)	no	PVS1_S	2Fe-2S ferroxidin domain, 3 FES binding sites
V58d	V58	189443	NM_003000.3:c.287-1G>C	1-17028737-C-G	17028737	2402	0	0.94	0.02	0.95	-37	-1	32	-137	4A	1	0.03	MASTER 2	PTC	partial exon skipping	E4AL/E4AG		p(-124)E4		2527		715	111	125	NM_003000.3:r.287_411del	NP_002991.2:p.(Ile97SerfsTer15)	no	PVS1
V58e	V58	189443	NM_003000.3:c.287-1G>C	1-17028737-C-G	17028737	2402	0	0.94	0.02	0.95	-37	-1	32	-137	4A	1	0.03	MASTER 2	uncharacterized2	intron retention	E3DL/E4AL			I3 (649 nt)			5163 2	132	4323 2	NM_003000.3:r.286_287ins[286+1_287-1]	NP_002991.2:p.(Ile97GlufsTer36)	no	N/A2	2Total Intron retention in MG cannot be translated to in vivo splicing
V52a	V52	188458	NM_003000.3:c.287G>T	1-17028736-C-A	17028736	2403	0	0.44	0.01	0.39	-36	0	33	-111	E4	0	1		full length	no effect							840	280	0			yes	BP7_S
V5	V5	183471	NM_003000.3:c.300T>C	1-17028723-A-G	17028723	2416	0	0	0.09	0	13	0	-69	46	E4	0	1	negative	full length	no effect							840	280	0			yes	BP7_S
V27a	V27	183485	NM_003000.3:c.365A>G	1-17028658-T-C	17028658	2481	0	0.01	0.92	0.34	934	78	1	-33	E4	0	1		full length	no effect							840	280	0			yes	BP7_S
V28a	V28	183486	NM_003000.3:c.372C>A	1-17028651-G-T	17028651	2488	0.06	0	0.65	0.88	-212	941	3	-51	E4	1	0.97		in-frame	partial exon skipping	E4DL/E4DG		p(-54)E4			2486	786	262	54	NM_003000.3:r.370_423del5	NP_002991.2:p.(Val124_Pro141del)	yes	PVS1_N/A5	5The transcript corresponds to the alternative transcript ENST00000485515.6
V28b	V28	183486	NM_003000.3:c.372C>A	1-17028651-G-T	17028651	2488	0.06	0	0.65	0.88	-212	941	3	-51	E4	0	0.03		full length	no effect							840	280	0			no	BP7_S
V29a	V29	183487	NM_003000.3:c.398T>G	1-17028625-A-C	17028625	2514	0.05	0	0.27	0.94	111	967	0	-25	E4	1	1		PTC	partial exon skipping	E4DL/E4DG		p(-25)E4			2515	815	134	25	NM_003000.3:r.399_423del	NP_002991.2:p.(Met133ArgfsTer2)	yes	PVS1
V30a	V30	187268	NM_003000.3:c.399G>C	1-17028624-C-G	17028624	2515	0.05	0	0.03	0.73	-185	-624	-24	1	E4	0	1		full length	no effect							840	280	0			yes	BP7_S
V31a	V31	187467	NM_003000.3:c.400T>G	1-17028623-A-C	17028623	2516	0.07	0	0.03	0.73	-184	969	-23	2	E4	0	1		full length	no effect							840	280	0			yes	BP7_S
V32a	V32	187468	NM_003000.3:c.401A>T	1-17028622-T-A	17028622	2517	0.02	0	0.02	0.72	-183	-622	-22	3	E4	0	1		full length	no effect							840	280	0			yes	BP7_S
V33a	V33	187473	NM_003000.3:c.402T>A	1-17028621-A-T	17028621	2518	0.05	0	0.27	0.81	115	-10	4	-21	E4	1	1		PTC	partial exon skipping	E4DL/E4DG		p(-25)E4			2515	815	134	25	NM_003000.3:r.399_423del	NP_002991.2:p.(Tyr134IlefsTer1)	no	PVS1
V34a	V34	187478	NM_003000.3:c.403G>T	1-17028620-C-A	17028620	2519	0	0.08	0.13	0.72	-9	116	34	5	E4	0	1		full length	no effect							840	280	0			yes	BP7_S
V53a	V53	188459	NM_003000.3:c.413A>G	1-17028610-T-C	17028610	2529	0	0.11	0.42	0.28	291	126	44	-10	E4	0	0.68		full length	no effect							840	280	0			yes	BP7_S
V53b	V53	188459	NM_003000.3:c.413A>G	1-17028610-T-C	17028610	2529	0	0.11	0.42	0.28	291	126	44	-10	E4	1	0.17		in-frame	partial exon skipping	E4DL/E4DG		p(-54)E4			2486	786	262	54	NM_003000.3:r.370_423del5	NP_002991.2:p.(Val124_Pro141del)	no	PVS1_N/A5	5The transcript corresponds to the alternative transcript ENST00000485515.6
V53c	V53	188459	NM_003000.3:c.413A>G	1-17028610-T-C	17028610	2529	0	0.11	0.42	0.28	291	126	44	-10	E4	1	0.15		PTC	partial exon skipping	E4DL/E4DG		p(-25)E4			2515	815	134	25	NM_003000.3:r.399_423del	NP_002991.2:p.(Tyr134IlefsTer1)	no	PVS1
V50a	V50	188432	NM_003000.3:c.423C>G	1-17028600-G-C	17028600	2539	0.06	0	0.03	0.52	-161	992	0	25	E4	0	1		full length	no effect							840	280	0			yes	BP7_S
V35a	V35	187479	NM_003000.3:c.423+1G>T	1-17028599-C-A	17028599	2540	0	0.11	0.5	0.97	-133	137	55	1	4D	1	0.73		PTC	partial exon skipping	E4DL/E4DG		p(-25)E4			2515	815	134	25	NM_003000.3:r.399_423del	NP_002991.2:p.(Tyr134IlefsTer1)	no	PVS1
V35b	V35	187479	NM_003000.3:c.423+1G>T	1-17028599-C-A	17028599	2540	0	0.11	0.5	0.97	-133	137	55	1	4D	1	0.27		in-frame	partial exon skipping	E4DL/E4DG		p(-54)E4			2486	786	262	54	NM_003000.3:r.370_423del5	NP_002991.2:p.(Val124_Pro141del)	no	PVS1_N/A5	5The transcript corresponds to the alternative transcript ENST00000485515.6
V36a	V36	187480	NM_003000.3:c.423+2T>G	1-17028598-A-C	17028598	2541	0	0.15	0.5	0.97	1587	138	56	2	4D	1	0.51		in-frame	partial exon skipping	E4DL/E4DG		p(-54)E4			2486	786	262	54	NM_003000.3:r.370_423del5	NP_002991.2:p.(Val124_Pro141del)	yes	PVS1_N/A5	5The transcript corresponds to the alternative transcript ENST00000485515.6
V36b	V36	187480	NM_003000.3:c.423+2T>G	1-17028598-A-C	17028598	2541	0	0.15	0.5	0.97	1587	138	56	2	4D	1	0.49		PTC	partial exon skipping	E4DL/E4DG		p(-25)E4			2515	815	134	25	NM_003000.3:r.399_423del	NP_002991.2:p.(Tyr134IlefsTer1)	no	PVS1
V37a	V37	187485	NM_003000.3:c.423+3G>T	1-17028597-C-A	17028597	2542	0	0.14	0.5	0.87	-131	139	57	3	I4	1	0.63		PTC	partial exon skipping	E4DL/E4DG		p(-25)E4			2515	815	134	25	NM_003000.3:r.399_423del	NP_002991.2:p.(Tyr134IlefsTer1)	yes	PVS1
V37b	V37	187485	NM_003000.3:c.423+3G>T	1-17028597-C-A	17028597	2542	0	0.14	0.5	0.87	-131	139	57	3	I4	1	0.35		in-frame	partial exon skipping	E4DL/E4DG		p(-54)E4			2486	786	262	54	NM_003000.3:r.370_423del5	NP_002991.2:p.(Val124_Pro141del)	no	PVS1_N/A5	5The transcript corresponds to the alternative transcript ENST00000485515.6
V37c	V37	187485	NM_003000.3:c.423+3G>T	1-17028597-C-A	17028597	2542	0	0.14	0.5	0.87	-131	139	57	3	I4	0	0.02		full length	no effect							840	280	0			no	BP7_S
V38a	V38	187490	NM_003000.3:c.423+4A>T	1-17028596-T-A	17028596	2543	0	0.09	0.54	0.96	-130	140	58	4	I4	1	0.69		PTC	partial exon skipping	E4DL/E4DG		p(-25)E4			2515	815	134	25	NM_003000.3:r.399_423del	NP_002991.2:p.(Tyr134IlefsTer1)	yes	PVS1
V38b	V38	187490	NM_003000.3:c.423+4A>T	1-17028596-T-A	17028596	2543	0	0.09	0.54	0.96	-130	140	58	4	I4	1	0.31		in-frame	partial exon skipping	E4DL/E4DG		p(-54)E4			2486	786	262	54	NM_003000.3:r.370_423del5	NP_002991.2:p.(Val124_Pro141del)	no	PVS1_N/A5	5The transcript corresponds to the alternative transcript ENST00000485515.6
V39a	V39	187491	NM_003000.3:c.423+5G>C	1-17028595-C-G	17028595	2544	0	0.12	0.52	0.97	-129	141	59	5	I4	1	0.72		PTC	partial exon skipping	E4DL/E4DG		p(-25)E4			2515	815	134	25	NM_003000.3:r.399_423del	NP_002991.2:p.(Tyr134IlefsTer1)	yes	PVS1
V39b	V39	187491	NM_003000.3:c.423+5G>C	1-17028595-C-G	17028595	2544	0	0.12	0.52	0.97	-129	141	59	5	I4	1	0.28		in-frame	partial exon skipping	E4DL/E4DG		p(-54)E4			2486	786	262	54	NM_003000.3:r.370_423del5	NP_002991.2:p.(Val124_Pro141del)	no	PVS1_N/A5	5The transcript corresponds to the alternative transcript ENST00000485515.6
V40a	V40	187492	NM_003000.3:c.423+6T>G	1-17028594-A-C	17028594	2545	0	0.17	0.46	0.89	1591	142	60	6	I4	1	0.53		in-frame	partial exon skipping	E4DL/E4DG		p(-54)E4			2486	786	262	54	NM_003000.3:r.370_423del5	NP_002991.2:p.(Val124_Pro141del)	yes	PVS1_N/A5	5The transcript corresponds to the alternative transcript ENST00000485515.6, Ins 2561_2562 (T), SpliceAI no predicted impact
V40b	V40	187492	NM_003000.3:c.423+6T>G	1-17028594-A-C	17028594	2545	0	0.17	0.46	0.89	1591	142	60	6	I4	1	0.46		PTC	partial exon skipping	E4DL/E4DG		p(-25)E4			2515	815	134	25	NM_003000.3:r.399_423del	NP_002991.2:p.(Tyr134IlefsTer1)	no	PVS1	Ins 2561_2562 (T)
V40c	V40	187492	NM_003000.3:c.423+6T>G	1-17028594-A-C	17028594	2545	0	0.17	0.46	0.89	1591	142	60	6	I4	0	0.02		full length	no effect							840	280	0			no	BP7_S	Ins 2561_2562 (T)
V42a	V42	188413	NM_003000.3:c.423+156G>T	1-17028444-C-A	17028444	2695	0.55	0.01	0.56	0.07	-5	-579	-132	181	I4	0	0.89		full length	no effect							840	280	0			yes	BP7_S
V42b	V42	188413	NM_003000.3:c.423+156G>T	1-17028444-C-A	17028444	2695	0.55	0.01	0.56	0.07	-5	-579	-132	181	I4	1	0.11		PTC	pseudo exon	I4AG/I4DG			128I4	2699	2828	968	176	128	NM_003000.3:r.423_424ins[423+161_423+288]	NP_002991.2:p.(Asp142GluTer35)	no	PVS1
V44a	V44	188417	NM_003000.3:c.423+190A>C	1-17028410-T-G	17028410	2729	0.47	0.02	0.51	0.06	29	-545	-98	215	I4	0	0.99		full length	no effect							840	280	0			yes	BP7_S
V44b	V44	188417	NM_003000.3:c.423+190A>C	1-17028410-T-G	17028410	2729	0.47	0.02	0.51	0.06	29	-545	-98	215	I4	1	0.01		PTC	pseudo exon	I4AG/I4DG			128I4	2699	2828	968	176	128	NM_003000.3:r.423_424ins[423+161_423+288]	NP_002991.2:p.(Asp142GluTer35)	no	PVS1
V45a	V45	188418	NM_003000.3:c.423+294G>T	1-17028306-C-A	17028306	2833	0.63	0	0.67	0.06	133	1	6	1	I4	0	0.91		full length	no effect							840	280	0			yes	BP7_S	3237_3239 Del (TTC)
V45b	V45	188418	NM_003000.3:c.423+294G>T	1-17028306-C-A	17028306	2833	0.63	0	0.67	0.06	133	1	6	1	I4	1	0.09		PTC	pseudo exon	I4AG/I4DG			128I4	2699	2828	968	176	128	NM_003000.3:r.423_424ins[423+161_423+288]	NP_002991.2:p.(Asp142GluTer35)	no	PVS1	3237_3239 Del (TTC)
V46a	V46	188424	NM_003000.3:c.423+296T>A	1-17028304-A-T	17028304	2835	0.43	0.01	0.52	0.04	135	-439	3	8	I4	0	0.97		full length	no effect							840	280	0			yes	BP7_S
V46b	V46	188424	NM_003000.3:c.423+296T>A	1-17028304-A-T	17028304	2835	0.43	0.01	0.52	0.04	135	-439	3	8	I4	1	0.03		PTC	pseudo exon	I4AG/I4DG			133I4	2699	2833	973	176	133	NM_003000.3:r.423_424ins[423+161_423+293]	NP_002991.2:p.(Asp142GluTer35)	no	PVS1
V41a	V41	188412	NM_003000.3:c.424-151T>G	1-17028016-A-C	17028016	3123	0.77	0.12	0.6	0.05	-1	-151	-76	-256	I4	0	0.91		full length	no effect							840	280	0			yes	BP7_S
V41b	V41	188412	NM_003000.3:c.424-151T>G	1-17028016-A-C	17028016	3123	0.77	0.12	0.6	0.05	-1	-151	-76	-256	I4	1	0.04		in-frame	partial exon skipping	E4DL/E4DG		p(-54)E4			2486	786	262	54	NM_003000.3:r.370_423del5	NP_002991.2:p.(Val124_Pro141del)	no	PVS1_N/A5	5The transcript corresponds to the alternative transcript ENST00000485515.6
V41c	V41	188412	NM_003000.3:c.424-151T>G	1-17028016-A-C	17028016	3123	0.77	0.12	0.6	0.05	-1	-151	-76	-256	I4	1	0.03		PTC	partial exon skipping	E4DL/E4DG		p(-25)E4			2515	815	134	25	NM_003000.3:r.399_423del	NP_002991.2:p.(Tyr134IlefsTer1)	no	PVS1
V41d	V41	188412	NM_003000.3:c.424-151T>G	1-17028016-A-C	17028016	3123	0.77	0.12	0.6	0.05	-1	-151	-76	-256	I4	1	0.02		PTC	intron retention	E5AL/I4AG			E5-150I4	3123		990	159	150	NM_003000.3:r.423_424ins[424-150_424-1]	NP_002991.2:p.(Asp142IlefsTer18)	no	PVS1
V43a	V43	188414	NM_003000.3:c.424-7A>G	1-17027872-T-C	17027872	3267	0.94	0.81	0	0.03	-1	-7	-112	-123	I4	1	0.95		no functional assesment3	intron retention	E5AL/I4AG			E5-6I4	3267		846	282	6	NM_003000.3:r.423_424ins[424-6_424-1]	NP_002991.2:p.(Asp142_Leu143insProGln)	yes	N/A3	3The variant is located at the Exon 5/Exon 6 splice junction. Due to the absence of the Exon 6 acceptor, the results of the splicing assay cannot be functionally assessed
V43b	V43	188414	NM_003000.3:c.424-7A>G	1-17027872-T-C	17027872	3267	0.94	0.81	0	0.03	-1	-7	-112	-123	I4	0	0.05		no functional assesment3	no effect							840	280	0			no	N/A3	3The variant is located at the Exon 5/Exon 6 splice junction. Due to the absence of the Exon 6 acceptor, the results of the splicing assay cannot be functionally assessed
V57a	V57	189442	NM_003000.3:c.424-1G>A	1-17027866-C-T	17027866	3273	0.52	0.93	0	0.3	-2	-1	59	-106	5A	1	1		no functional assesment3	partial exon skipping	E5AL/E5AG		p(-1)E5		3274		839	142	1	NM_003000.3:r.424del	NP_002991.2:p.(Asp142IlefsTer1)	yes	N/A3	3The variant is located at the Exon 5/Exon 6 splice junction. Due to the absence of the Exon 6 acceptor, the results of the splicing assay cannot be functionally assessed
WTa	MG_WT	182861															0.96		full length	no effect												yes
WTb	MG_WT	182861															0.02		PTC	single exon skipping	E3AL/E3DL		E3				754	88	86	NM_003000.3:r.201_286del	NP_002991.2:p.(Cys68HisfsTer21)	no
WTc	MG_WT	182861															0.02		PTC	partial exon skipping	E4DL/E4DG		p(-25)E4			2515	815	134	25	NM_003000.3:r.399_423del	NP_002991.2:p.(Tyr134IlefsTer1)	no
WTd	MG_WT	182861															<0,01		in-frame	partial exon skipping	E4DL/E4DG		p(-54)E4			2486	786	262	54	NM_003000.3:r.370_423del5	NP_002991.2:p.(Val124_Pro141del)	no		5The transcript corresponds to the alternative transcript ENST00000485515.6
